# Supplementary material for: Prediction of Clinically Relevant Safety Signals of Nephrotoxicity through Plasma Metabolite Profiling
Source: Biomed Res Int. 2013 May 21;2013:202497. doi: 10.1155/2013/202497 (PMC3673329; doi:10.1155/2013/202497)
Supplement: Supplementary file 1 — Supplementary Figures provide the detailed Pattern Ranking results for cyclosporin A, doxorubicin, captopril and lisinopril, while Supplementary Table 1 provides the measured metabolites and their fold changes for all treatment groups. [file 202497.f1.zip]

Archive with 9 entries (9 files):
- SuppFigure_1.xlsx
- SuppFigure_2.xlsx
- SuppFigure_3.xlsx
- SuppFigure_4.xlsx
- SuppFigure_5.xlsx
- SuppFigure_6.xlsx
- SuppFigure_7.xlsx
- SuppFigure_8.xlsx
- SupplementaryTable1.xls
