# Supplementary material for: Prediction of Clinically Relevant Safety Signals of Nephrotoxicity through Plasma Metabolite Profiling
Source: Biomed Res Int. 2013 May 21;2013:202497. doi: 10.1155/2013/202497 (PMC3673329; doi:10.1155/2013/202497)
Supplement: Supplementary file 1 — Supplementary Figures provide the detailed Pattern Ranking results for cyclosporin A, doxorubicin, captopril and lisinopril, while Supplementary Table 1 provides the measured metabolites and their fold changes for all treatment groups. [file 202497.f1.zip › SuppFigure_1.xlsx]

## Sheet: Cyclosporin A HD
Rank no.	Pattern Name	Median r	Assessment
1	Adrenals_steroid synthesis Inhibition_female high dose	0.891948	Equivocal
2	Duodenum_iron-deficiency_male high dose	0.842614	Match
3	Bone marrow_suppression_male high dose day 28	0.832749	Mis-match
4	Blood_platelet aggregation inhibition_female high dose (Putative)	0.826221	Mis-match
5	Blood_anemia_male high dose	0.810634	Weak Match
6	Immune System_Immunsuppression_male low dose day 28	0.81018	Match
7	Liver_paracetamol-derived_female high dose	0.791753	Match
8	Spleen_methemoglobinemia_female high dose	0.789846	Match
9	Liver_paracetamol-derived_male high dose	0.780161	Match
10	Hormones_testosterone_female high dose	0.777013	Equivocal
11	Bone_ostoblast inhibitor_male high dose day 28	0.773379	Weak Match
12	Blood_anemia_female high dose	0.768848	Match
13	Kidney_glomerular-tubular defect_female high dose	0.761581	Match
14	Spleen_methemoglobinemia_female high dose	0.759441	Match
15	Nervous system_serotonin receptor antagonist_female high dose	0.742981	Weak Match
16	Kidney_interstitial nephritis_male high dose	0.741916	Match
17	Kidney_diuretik-like_female high dose day 28	0.725634	Match
18	Bone_osteoblast inhibitor_male high dose	0.717996	Match
19	Adrenals_hypocortisolism_male high dose day 28	0.714523	Mis-match
20	Spleen_Methemoglobinemia_male high dose	0.699675	Match
21	Bone marrow_suppression platins_female low dose	0.698502	Mis-match
22	Kidney_tubular necrosis_female high dose day 28	0.696164	Mis-match
			Assessment	Explanation
			Match	Metabolite changes matching with respective pattern
			Weak Match	Metabolite changes weakly matching with respective pattern
			Equivocal	Equivocal - no conclusion possible
			Mis-match	Metabolite changes not matching with respective pattern
