# Supplementary material for: Prediction of Clinically Relevant Safety Signals of Nephrotoxicity through Plasma Metabolite Profiling
Source: Biomed Res Int. 2013 May 21;2013:202497. doi: 10.1155/2013/202497 (PMC3673329; doi:10.1155/2013/202497)
Supplement: Supplementary file 1 — Supplementary Figures provide the detailed Pattern Ranking results for cyclosporin A, doxorubicin, captopril and lisinopril, while Supplementary Table 1 provides the measured metabolites and their fold changes for all treatment groups. [file 202497.f1.zip › SuppFigure_2.xlsx]

## Sheet: Cyclosporin A LD
Rank no.	Pattern Name	Median r	Assessment
1	Immune System_Immunsuppression_male low dose day 28	0.980651	Match
2	Adrenals_steroid synthesis Inhibition_female high dose	0.911716	Equivocal
3	Duodenum_iron-deficiency_female high dose	0.80712	Weak Match
4	Bone marrow_suppression_male high dose day 28	0.799048	Mis-match
5	Bone_ostoblast inhibitor_male high dose day 28	0.793946	Mis-match
6	Liver_paracetamol-derived_female high dose	0.792493	Weak Match
7	Blood_anemia_female high dose	0.787021	Mis-match
8	Hormones_GnRH agonist_female high dose (putative)	0.774794	Mis-match
9	Nervous system_serotonin receptor antagonist_female high dose	0.763049	Mis-match
10	Spleen_Methemoglobinemia_male high dose	0.759049	Mis-match
11	Blood_platelet aggregation inhibition_female high dose (Putative)	0.757589	Mis-match
12	Liver_enzyme induction_female high dose	0.71799	Mis-match
13	vehicle oil_females	0.699304	Mis-match
14	Blood_porphyrin inhibition_female high dose	0.697891	Mis-match
15	Hormones_testosterone_female high dose	0.688214	Mis-match
16	Liver_paracetamol-derived_male high dose	0.660795	Weak Match
17	Liver_toxicity_female high dose	0.650854	Mis-match
18	Spleen_methemoglobinemia_female high dose	0.638354	Mis-match
19	Thyroid_indirect, liver enzyme induction_female high dose	0.635365	Mis-match
20	Adrenals_hypocortisolism_male high dose day 28	0.632468	Mis-match
21	Liver_enzyme induction_male high dose	0.629698	Mis-match
22	Thyroid_hyperthyreodism_female high dose	0.628773	Mis-match
			Assessment	Explanation
			Match	Metabolite changes matching with respective pattern
			Weak Match	Metabolite changes weakly matching with respective pattern
			Equivocal	Equivocal - no conclusion possible
			Mis-match	Metabolite changes not matching with respective pattern
