# Supplementary material for: Prediction of Clinically Relevant Safety Signals of Nephrotoxicity through Plasma Metabolite Profiling
Source: Biomed Res Int. 2013 May 21;2013:202497. doi: 10.1155/2013/202497 (PMC3673329; doi:10.1155/2013/202497)
Supplement: Supplementary file 1 — Supplementary Figures provide the detailed Pattern Ranking results for cyclosporin A, doxorubicin, captopril and lisinopril, while Supplementary Table 1 provides the measured metabolites and their fold changes for all treatment groups. [file 202497.f1.zip › SuppFigure_3.xlsx]

## Sheet: Doxorubicin HD
Rank no.	Pattern Name	Median r	Assessment
1	Systemic_antiproliferative_female high dose	0.95698	Match
2	Liver_Tox_male high dose	0.921322	Match
3	Liver_enzyme induction_male high dose	0.859406	Match
4	Blood_anemia_male high dose	0.858907	Weak Match
5	Hormones_antiandrogen_male high dose	0.787322	Weak Match
6	Blood_anemia_female high dose	0.776338	Weak Match
7	Nervous system_serotonine reuptake inhibition_male high dose	0.752134	Mis-match
8	Bone marrow_suppression_male high dose day 28	0.747296	Match
9	Bone marrow_suppression_female high dose day 28 (putative)	0.739344	Weak Match
10	Phthalates_short-chain_male high dose (putative)	0.737352	Equivocal
11	Kidney_diuretic effect_male low dose	0.736483	Mis-match
12	Thyroid_indirect, liver enzyme indunction_male high dose	0.715597	Match
13	Adrenals_hypocortisolism_male high dose day 28	0.71552	Mis-match
14	Immune System_Immunsuppression_male low dose day 28	0.697464	Mis-match
15	Adrenals_cortex_synthesis inhibition_male high dose	0.687459	Equivocal
16	Bone marrow supression platins_male low dose day 28	0.675134	Mis-match
17	Liver_enzyme induction_male high dose day 7	0.663167	Match
18	Liver_paracetamol-derived_male high dose	0.661987	Mis-match
19	Adrenals_steroid synthesis Inhibition_female high dose	0.656752	Mis-match
20	Thyroid_direct inhibition strong_male high dose	0.656315	Mis-match
21	CNS_antipsychotic drugs_dopamine receptor block_male high dose	0.652242	Mis-match
22	Kidney_tubular necrosis_female high dose day 28	0.635728	Mis-match
			Assessment	Explanation
			Match	Metabolite changes matching with respective pattern
			Weak Match	Metabolite changes weakly matching with respective pattern
			Equivocal	Equivocal - no conclusion possible
			Mis-match	Metabolite changes not matching with respective pattern
