# Supplementary material for: Prediction of Clinically Relevant Safety Signals of Nephrotoxicity through Plasma Metabolite Profiling
Source: Biomed Res Int. 2013 May 21;2013:202497. doi: 10.1155/2013/202497 (PMC3673329; doi:10.1155/2013/202497)
Supplement: Supplementary file 1 — Supplementary Figures provide the detailed Pattern Ranking results for cyclosporin A, doxorubicin, captopril and lisinopril, while Supplementary Table 1 provides the measured metabolites and their fold changes for all treatment groups. [file 202497.f1.zip › SuppFigure_4.xlsx]

## Sheet: Doxorubicin LD
Rank no.	Pattern Name	Median r	Assessment
1	Bone marrow_suppression platins_female low dose	0.879177	Weak Match
2	Immune System_Immunsuppression_male low dose day 28	0.82049	Mis-match
3	Bone_osteoblast inhibitor_male high dose	0.759895	Equivocal
4	Bone marrow_suppression_male high dose day 28	0.742354	Weak Match
5	Blood_anemia_male high dose	0.726901	Mis-match
6	Adrenals_hypocortisolism_male high dose day 28	0.722543	Mis-match
7	Adrenals_steroid synthesis Inhibition_female high dose	0.708527	Equivocal
8	Bone marrow supression platins_male low dose day 28	0.697688	Equivocal
9	Bone marrow_suppression_female high dose day 28 (putative)	0.680182	Mis-match
10	Kidney_tubular necrosis_female high dose day 28	0.666919	Match
11	Kidney_diuretik-like_female high dose day 28	0.666096	Mis-match
12	Hormones_GnRH agonist_female high dose (putative)	0.627549	Mis-match
13	Spleen_haematopoiesis_male high dose	0.619356	Mis-match
14	CNS_GABA receptor agonist_male low dose day 28	0.617996	Mis-match
15	Nervous System_dopamin agonist_female high dose day 28	0.610999	Mis-match
16	Hormones_testosterone_female high dose	0.599462	Mis-match
17	Adrenals_hypocortisolism_female high dose day 28	0.547992	Mis-match
18	Liver_peroxisome proliferation_female high dose	0.547038	Mis-match
19	Kidney_tubular defect_female high dose	0.546275	Mis-match
20	Liver_peroxisomal proliferation_female high dose day 28	0.535446	Mis-match
21	Nervous system_serotonin receptor antagonist_female high dose	0.531433	Mis-match
22	Blood_anemia_female high dose	0.521525	Mis-match
			Assessment	Explanation
			Match	Metabolite changes matching with respective pattern
			Weak Match	Metabolite changes weakly matching with respective pattern
			Equivocal	Equivocal - no conclusion possible
			Mis-match	Metabolite changes not matching with respective pattern
