# Supplementary material for: Prediction of Clinically Relevant Safety Signals of Nephrotoxicity through Plasma Metabolite Profiling
Source: Biomed Res Int. 2013 May 21;2013:202497. doi: 10.1155/2013/202497 (PMC3673329; doi:10.1155/2013/202497)
Supplement: Supplementary file 1 — Supplementary Figures provide the detailed Pattern Ranking results for cyclosporin A, doxorubicin, captopril and lisinopril, while Supplementary Table 1 provides the measured metabolites and their fold changes for all treatment groups. [file 202497.f1.zip › SuppFigure_5.xlsx]

## Sheet: Captopril HD
Rank no.	Pattern Name	Median r	Assessment
1	Kidney_glomerular-tubular defect_male high dose	0.896379	Match
2	Kidney_glomerular-tubular defect_male high dose day 7 (putative)	0.856161	Match
3	Kidney_glomerular-tubular defect_female high dose	0.815235	Match
4	Hormones_testosterone_female high dose	0.706925	Mis-match
5	Blood_anemia_female high dose	0.619334	Mis-match
6	Adrenals_steroid synthesis Inhibition_female high dose	0.61423	Weak Match
7	Liver PXR_female high dose	0.608096	Mis-match
8	CNS_GABA receptor agonist_male low dose day 28	0.593616	Mis-match
9	Blood_porphyrin inhibition_female high dose	0.58348	Mis-match
10	Kidney_tubular defect_male high dose	0.577977	Mis-match
11	Liver_peroxisomal proliferation_male high dose	0.567436	Mis-match
12	Bone marrow_suppression platins_female low dose	0.553363	Mis-match
13	Nervous system_sympathic noradrenalin increase_male high dose (putative)	0.546549	Mis-match
14	Immune System_Immunsuppression_male low dose day 28	0.529451	Mis-match
15	Pancreas_insulin secretion_female high dose day 7 (putative)	0.522604	Mis-match
16	Kidney_tubular defect_female high dose	0.522336	Mis-match
17	Liver_peroxisomal proliferation_female high dose day 14	0.509664	Mis-match
18	Kidney direct tubular effect_male high dose day 28	0.499636	Mis-match
19	Thyroid_hyperthyreodism_female high dose	0.495807	Mis-match
20	Kidney_diuretik-like_female high dose day 28	0.491561	Mis-match
21	Blood_porphyrin inhibition_female high dose day 28	0.48489	Mis-match
22	Liver_enzyme induction_female high dose day 14	0.483812	Mis-match
			Assessment	Explanation
			Match	Metabolite changes matching with respective pattern
			Weak Match	Metabolite changes weakly matching with respective pattern
			Equivocal	Equivocal - no conclusion possible
			Mis-match	Metabolite changes not matching with respective pattern
