# Supplementary material for: Prediction of Clinically Relevant Safety Signals of Nephrotoxicity through Plasma Metabolite Profiling
Source: Biomed Res Int. 2013 May 21;2013:202497. doi: 10.1155/2013/202497 (PMC3673329; doi:10.1155/2013/202497)
Supplement: Supplementary file 1 — Supplementary Figures provide the detailed Pattern Ranking results for cyclosporin A, doxorubicin, captopril and lisinopril, while Supplementary Table 1 provides the measured metabolites and their fold changes for all treatment groups. [file 202497.f1.zip › SuppFigure_6.xlsx]

## Sheet: Captopril LD
Rank no.	Pattern Name	Median r	Assessment
1	Liver_oxidative stress_male high dose day 28 (putative)	0.969535	Match
2	Bone marrow_suppression platins_female low dose	0.852788	Match
3	liver_oxidative stress_male low and high dose (putative)	0.813593	Match
4	Bone marrow supression platins_male low dose day 28	0.80788	Match
5	liver_oxidative stress_male low and high dose (putative)	0.78988	Match
6	Kidney_tubular defect_male high dose	0.778131	Weak Match
7	Phthalates_long-chain_male high dose (putative)	0.735239	Weak Match
8	Liver_PPAR alpha agonist_male high dose	0.714653	Mis-match
9	Kidney direct tubular effect_male high dose day 28	0.697105	Match
10	Adrenals_hypocortisolism_male high dose day 28	0.695511	Mis-match
11	Kidney_tubular defect_female high dose	0.675251	Mis-match
12	Bone marrow_suppression_male high dose day 28	0.669855	Mis-match
13	Bone_mineralisation_male high dose day 28	0.669695	Mis-match
14	Bone marrow_suppression_female high dose day 28 (putative)	0.648616	Mis-match
15	Kidney_tubular necrosis_female high dose day 28	0.639817	Mis-match
16	Kidney_glomerular-tubular defect_male high dose	0.627168	Mis-match
17	Liver_peroxisomal proliferation_male high dose	0.622475	Mis-match
18	Immune System_Immunsuppression_male low dose day 28	0.610641	Mis-match
19	Kidney_glomerular-tubular defect_male high dose day 7 (putative)	0.58376	Weak Match
20	Hormones_testosterone_male high dose	0.573543	Mis-match
21	Liver_fibrate phthalate phenoxy_male high dose day 28	0.564686	Mis-match
22	Testes_Toxicity_male high dose	0.563066	Mis-match
			Assessment	Explanation
			Match	Metabolite changes matching with respective pattern
			Weak Match	Metabolite changes weakly matching with respective pattern
			Equivocal	Equivocal - no conclusion possible
			Mis-match	Metabolite changes not matching with respective pattern
