# Supplementary material for: Prediction of Clinically Relevant Safety Signals of Nephrotoxicity through Plasma Metabolite Profiling
Source: Biomed Res Int. 2013 May 21;2013:202497. doi: 10.1155/2013/202497 (PMC3673329; doi:10.1155/2013/202497)
Supplement: Supplementary file 1 — Supplementary Figures provide the detailed Pattern Ranking results for cyclosporin A, doxorubicin, captopril and lisinopril, while Supplementary Table 1 provides the measured metabolites and their fold changes for all treatment groups. [file 202497.f1.zip › SuppFigure_7.xlsx]

## Sheet: Lisinopril HD
Rank no.	Pattern Name	Median r	Assessment
1	Kidney_ACE inhibitor like_male high dose	0.920086	Match
2	Blood_platelet aggregation inhibition_female high dose (Putative)	0.780355	Weak Match
3	Nutrition biomarker of feed exposure_males day 7 and day 14	0.769447	Mis-match
4	Nervous system_serotonine reuptake inhibition_male high dose	0.748156	Mis-match
5	Thyroid_indirect, liver enzyme indunction_male high dose	0.747324	Mis-match
6	Liver_enzyme induction_male high dose	0.687514	Mis-match
7	Kidney_diuretic effect_male low dose	0.681813	Match
8	Duodenum_iron-deficiency_female high dose	0.675338	Mis-match
9	Nervous system_serotonin receptor antagonist_female high dose	0.643272	Mis-match
10	Pharma_PDE-V inibition_male high dose day 28	0.624365	Mis-match
11	Liver_Tox_male high dose	0.621263	Mis-match
12	Liver_enzyme induction_female high dose	0.617928	Mis-match
13	Thyroid_direct inhibition strong_male high dose	0.595169	Mis-match
14	CNS_GABA receptor agonist_female low dose day 28	0.549403	Mis-match
15	Liver_enzyme induction_female high dose day 14	0.540661	Mis-match
16	Adrenals_cortex_synthesis inhibition_male high dose	0.533896	Mis-match
17	Hormones_testosterone_female high dose	0.533154	Mis-match
18	Liver_peroxisomal proliferation_female high dose day 14	0.514866	Mis-match
19	CNS_dopamine antagonists_female high dose	0.509821	Mis-match
20	CNS_GABA receptor agonist_male low dose day 28	0.50869	Mis-match
21	Adrenals_steroid synthesis Inhibition_female high dose	0.50731	Mis-match
22	Immune System_Immunsuppression_male low dose day 28	0.504489	Mis-match
			Assessment	Explanation
			Match	Metabolite changes matching with respective pattern
			Weak Match	Metabolite changes weakly matching with respective pattern
			Equivocal	Equivocal - no conclusion possible
			Mis-match	Metabolite changes not matching with respective pattern
