# Supplementary material for: Prediction of Clinically Relevant Safety Signals of Nephrotoxicity through Plasma Metabolite Profiling
Source: Biomed Res Int. 2013 May 21;2013:202497. doi: 10.1155/2013/202497 (PMC3673329; doi:10.1155/2013/202497)
Supplement: Supplementary file 1 — Supplementary Figures provide the detailed Pattern Ranking results for cyclosporin A, doxorubicin, captopril and lisinopril, while Supplementary Table 1 provides the measured metabolites and their fold changes for all treatment groups. [file 202497.f1.zip › SuppFigure_8.xlsx]

## Sheet: Lisinopril LD
Rank no.	Pattern Name	Median r	Assessment
1	Kidney_ACE inhibitor like_male high dose	0.79546	Match
2	Reduced feed consumption_male day 7	0.718522	Weak Match
3	Eye_HPPD-inhibition_male high dose	0.713615	Mis-match
4	Liver_oxidative stress_male high dose day 28 (putative)	0.675683	Mis-match
5	Hormones_GnRH agonist_male high dose	0.661382	Mis-match
6	Pharma_PDE-V inibition_male high dose day 28	0.613626	Mis-match
7	vehicle oil_males	0.568548	Mis-match
8	Liver PXR_male high dose	0.557607	Mis-match
9	Blood_platelet aggregation inhibition_female high dose (Putative)	0.555294	Mis-match
10	Pancreas_endocrine modulation_female high dose	0.55222	Mis-match
11	liver_oxidative stress_male low and high dose (putative)	0.541117	Mis-match
12	Kidney_tubular necrosis_female high dose day 28	0.497517	Mis-match
13	Kidney_ADH inhibitor_male high dose day 28	0.482698	Mis-match
14	Spleen_methemoglobinemia_female high dose	0.480221	Mis-match
15	liver_oxidative stress_male low and high dose (putative)	0.46882	Mis-match
16	Spleen_methemoglobinemia_female high dose	0.4617	Mis-match
17	Adrenals_cortex dihydrotestosterone-reducer_female high dose (putative)	0.460458	Mis-match
18	Bone_mineralisation_male high dose day 28	0.450628	Mis-match
19	CNS_antipsychotic drugs_dopamine receptor block_male high dose	0.428833	Mis-match
20	Kidney_glomerular-tubular defect_female high dose	0.428322	Mis-match
21	CNS_receptor block serotonine-dopamine_female high dose	0.41748	Mis-match
22	Kidney_diuretic effect_male low dose	0.411697	Mis-match
			Assessment	Explanation
			Match	Metabolite changes matching with respective pattern
			Weak Match	Metabolite changes weakly matching with respective pattern
			Equivocal	Equivocal - no conclusion possible
			Mis-match	Metabolite changes not matching with respective pattern
