# Supplementary material for: Prediction of Clinically Relevant Safety Signals of Nephrotoxicity through Plasma Metabolite Profiling
Source: Biomed Res Int. 2013 May 21;2013:202497. doi: 10.1155/2013/202497 (PMC3673329; doi:10.1155/2013/202497)
Supplement: Supplementary file 1 — Supplementary Figures provide the detailed Pattern Ranking results for cyclosporin A, doxorubicin, captopril and lisinopril, while Supplementary Table 1 provides the measured metabolites and their fold changes for all treatment groups. [file 202497.f1.zip › SupplementaryTable1.xls]

## Sheet: Phenytoin
Profile name:	Phenytoin
pValue:	0.05
			Phenytoin HD	Cyclosporin A (MOA35) HD	Cyclosporin A (MOA35) HD	Cyclosporin A (MOA35) HD	Cyclosporin A (MOA35) HD	Cyclosporin A (MOA35) HD	Phenytoin LD	Cyclosporin A (MOA35) LD	Cyclosporin A (MOA35) LD	Cyclosporin A (MOA35) LD	Cyclosporin A (MOA35) LD	Cyclosporin A (MOA35) LD
Metabolite	Class	Subclass	f7	f14	f28	m7	m14	m28	f7	f14	f28	m7	m14	m28
Aspartate	Amino acids	Amino acids, acidic	0.9	1.26	0.96	0.78	0.66	0.85	0.9	0.98	0.8	0.87	0.71	1.16
Glutamate	Amino acids	Amino acids, acidic	0.93	0.88	0.97	0.96	0.71	0.93	0.98	1.04	0.81	0.92	0.85	0.94
Phenylalanine	Amino acids	Amino acids, aromatic	1.28	1.33	1.01	1.12	1.08	1.06	1.06	0.99	1.23	0.97	0.97	1.17
Tryptophan	Amino acids	Amino acids, aromatic	1.02	0.86	1.09	1.03	0.97	1.07	0.95	1.07	1.08	1.06	0.93	1.01
Tyrosine	Amino acids	Amino acids, aromatic	0.96	0.85	0.94	0.93	1.08	0.93	0.92	0.99	1.13	0.88	1.04	0.99
Arginine	Amino acids	Amino acids, basic	1.02	1.05	0.92	1.06	1.25	1.17	1.2	1.07	1.03	1.11	1.04	1.35
Asparagine	Amino acids	Amino acids, basic	1.23	1.04	0.98	0.93	0.98	0.88	1.1	1.01	1.06	0.82	0.88	0.97
Glutamine	Amino acids	Amino acids, basic	1.37	0.82	1.05	1.15	1.41	1.2	1.21	1.24	1.19	1.04	1.04	1.04
Histidine	Amino acids	Amino acids, basic	1.58	1.44	1.19	1.14	1.51	1.11	1.08	1.05	1.27	1.07	1.01	0.98
Lysine	Amino acids	Amino acids, basic	0.73	0.61	0.75	0.85	0.94	0.87	1.06	1.02	1.03	0.96	0.98	0.95
Isoleucine	Amino acids	Amino acids, branched chain	1.39	1.39	1.01	1.01	1.17	1.11	1.07	1.02	1.23	0.91	0.97	1.23
Leucine	Amino acids	Amino acids, branched chain	1.49	1.46	1.01	1.04	1.18	1.14	1.07	0.99	1.14	0.92	0.95	1.28
Valine	Amino acids	Amino acids, branched chain	1.48	1.42	1.04	1.05	1.24	1.13	1.07	1.01	1.22	0.89	0.99	1.18
Alanine	Amino acids	Amino acids, neutral	1.04	1.16	0.98	0.9	1.09	0.91	1.08	1.02	1.06	0.9	1.08	0.97
Glycine	Amino acids	Amino acids, neutral	1.15	1.24	1.24	1.02	1.12	1.07	1.09	0.94	1.22	0.91	0.99	0.96
Proline	Amino acids	Amino acids, neutral	1.09	1.1	1.05	0.95	1	0.98	1.09	0.98	1.08	0.91	0.98	1.03
Serine	Amino acids	Amino acids, neutral	1.24	1.33	1.31	1	1.22	1.03	1.02	0.98	1.09	0.89	1.05	1.06
Threonine	Amino acids	Amino acids, neutral	1.83	1.7	1.16	1.09	1.2	1.08	1.04	1	1.17	0.99	1.06	0.93
Cysteine (additional: Cystine)	Amino acids	Amino acids, S-containing	0.62	0.65	0.99	0.79	0.91	0.71	0.91	1.29	0.86	1.1	0.86	0.73
Cystine	Amino acids	Amino acids, S-containing	0.45	0.44	0.92	0.73	1.06	0.87	0.95	1.35	0.71	0.99	0.97	0.59
Methionine	Amino acids	Amino acids, S-containing	1.17	1.15	1.01	0.99	1.1	1.04	1.06	1.12	1.1	0.95	1	1.16
Taurine	Amino acids	Amino acids, S-containing	1.13	1.29	1.08	1	1.07	1.26	0.95	1.01	0.73	0.73	0.68	1.14
5-Oxoproline (additional: Folic acid, Glutamate, Glutamine)	Amino acids related	Amino acid metabolites	0.98	1.07	1.03	0.91	1.05	1	0.98	0.98	1.01	0.92	1	1
Ketoleucine	Amino acids related	Amino acid metabolites	0.68	0.85	0.7	1.18	1.32	0.74	0.74	0.97	0.82	0.96	1.36	0.92
trans-4-Hydroxyproline	Amino acids related	Collagen metabolism	0.77	0.73	1.04	0.67	0.75	0.71	0.96	0.93	0.95	0.95	0.97	0.99
Creatine	Amino acids related	Creatine metabolism	1.22	1.08	0.99	1.14	1.04	1.18	1.2	0.88	1.04	1	0.86	1.12
Creatinine	Amino acids related	Creatine metabolism	0.85	0.82	0.93	0.76	0.89	0.91	0.94	0.86	0.89	1.01	1	0.91
3-Hydroxyindole (additional: 3-Indoxylsulfate)	Amino acids related	Tryptophan metabolism	1.34	0.98	0.68	0.78	0.93	1.01	1.15	0.97	0.85	1.39	1.14	1.04
3-Indoxylsulfate	Amino acids related	Tryptophan metabolism	1.29	0.84	0.82	0.85	0.78	1.02	1.07	0.8	0.75	1.1	0.92	1.78
Indole-3-acetic acid	Amino acids related	Tryptophan metabolism	0.72	0.58	0.39	1.5	0.83	0.52	0.64	0.94	0.82	1.02	1.01	1.27
Indole-3-lactic acid	Amino acids related	Tryptophan metabolism	0.97	0.87	0.96	0.85	0.97	1.07	0.76	1.07	1.13	0.9	0.89	1.02
Kynurenic acid	Amino acids related	Tryptophan metabolism	0.81	0.98	1.32	1	0.83	0.78	1.09	0.98	1.15	1.05	0.92	0.79
Citrulline	Amino acids related	Urea cycle and related	1.01	1.24	1.2	1.01	1.2	1.15	0.94	0.98	0.98	0.9	0.97	0.9
Ornithine (additional: Arginine, Citrulline)	Amino acids related	Urea cycle and related	1.25	1.36	1.16	0.98	1.13	1.22	0.92	1.02	1.06	0.87	0.89	1.06
Urea	Amino acids related	Urea cycle and related	1.15	1.2	0.9	1.04	1.13	1.1	0.89	1.35	0.96	0.78	0.99	1
Glucosamine	Carbohydrates and related	Aminosugars	1.09	0.81	1.35	1.2	1.68	0.94	1.02	1.52	1.24	0.74	1.3	0.73
Mannosamine	Carbohydrates and related	Aminosugars	1.18	1.04	1.23	0.96	1.19	1	1.05	1.44	1.27	0.8	0.89	0.8
Sucrose	Carbohydrates and related	Disaccharides	0.47	1.92	1.16	1.65	1	0.86	0.77	1.13	1.09	1.21	1.25	0.92
Glucose (additional: Galactose, Gluconic acid, Mannitol)	Carbohydrates and related	Monosaccharides	1.09	0.85	0.89	0.77	1	0.8	1.02	1	0.8	0.9	1.26	0.94
Mannose	Carbohydrates and related	Monosaccharides	1.01	0.9	1	0.93	1.07	1.08	1.06	1.02	1	1.02	1.09	1.13
Ribal (additional: 2'-Deoxyadenosine, 2'-Deoxycytidine, 2'-Deoxyguanosine, 2'-Deoxythymidine, 2'-Deoxyuridine)	Carbohydrates and related	Nucleobase related saccharides	0.91	0.96	0.92	0.96	1	0.82	0.9	0.98	0.99	1.16	1.01	1.14
1,5-Anhydrosorbitol	Carbohydrates and related	Polyols	1.12	0.96	1.08	1.07	1.17	1.06	0.96	1.03	1	0.86	1.06	1.28
myo-Inositol	Carbohydrates and related	Polyols	1.02	1.04	1.09	0.84	0.86	0.97	0.98	0.94	0.69	0.81	0.75	0.94
scyllo-Inositol	Carbohydrates and related	Polyols	1.15	1.26	1.21	1.24	1.4	1.59	0.92	1.17	0.91	1.09	1.07	1.24
Xylitol	Carbohydrates and related	Polyols	3	3.41	2.12	1.32	1.56	1.8	1.28	1.72	1.23	1.06	1.33	1.3
Erythronic acid	Carbohydrates and related	Sugar acids	0.82	0.92	0.82	0.95	1	0.96	0.77	1	0.97	0.91	1.14	0.94
Glucuronic acid	Carbohydrates and related	Sugar acids	2.78	3.3	1.65	1.9	2.39	1.71	1.53	2.12	1.15	1.26	1.23	1.25
Cholic acid	Complex lipids, fatty acids and related	Bile acids	23.91	388.69	51.68	51.14	77.73	15.08	2.4	23.38	78.51	2.09	47.61	8.79
Ceramide (d18:1,C24:0)	Complex lipids, fatty acids and related	Ceramides	1.54	1.59	2.17	1.25	1.72	1.58	1.14	1.38	1.15	1.19	1.06	1.11
Cholesterol, total	Complex lipids, fatty acids and related	Cholesterol and related	1.7	2.11	1.93	1.2	1.19	1.27	1	1.33	1.07	1.02	1.01	1.22
DAG (C18:1,C18:2)	Complex lipids, fatty acids and related	Diacylglycerols	1.31	1.99	2.14	0.57	0.74	0.86	1.46	1.05	2.05	1.5	1.38	1.45
14-Methylhexadecanoic acid	Complex lipids, fatty acids and related	Fatty acids, branched	0.97	0.99	1.04	1	1.14	1.09	1.1	0.98	0.94	1.05	1.04	0.98
16-Methylheptadecanoic acid	Complex lipids, fatty acids and related	Fatty acids, branched	1.16	1.1	1.46	0.89	0.97	1.27	0.99	1	1.11	1.31	1.1	0.95
17-Methyloctadecanoic acid	Complex lipids, fatty acids and related	Fatty acids, branched	1.15	1.38	1.43	0.96	0.84	1.1	1.15	1.35	1.24	1	0.97	0.95
Eicosaenoic acid (C20:1) No 02	Complex lipids, fatty acids and related	Fatty acids, mono-unsaturated	1.4	1.45	1.09	0.73	1.55	1.3	0.91	0.95	0.99	0.62	0.95	0.85
Elaidic acid (C18:trans[9]1)	Complex lipids, fatty acids and related	Fatty acids, mono-unsaturated	1.4	1.83	1.36	0.93	0.97	1.14	1.06	1.23	1.15	0.81	0.79	0.95
Nervonic acid (C24:cis[15]1)	Complex lipids, fatty acids and related	Fatty acids, mono-unsaturated	1.98	2.15	2.3	1.6	1.81	1.64	1.09	1.62	0.92	0.78	1.15	0.98
Oleic acid (C18:cis[9]1)	Complex lipids, fatty acids and related	Fatty acids, mono-unsaturated	1.54	1.62	1.89	0.99	1.1	1.05	1.31	1.36	1.31	1.16	1.03	1.27
Palmitoleic acid (C16:cis[9]1)	Complex lipids, fatty acids and related	Fatty acids, mono-unsaturated	1.71	1.19	2.92	1.01	0.96	1.19	1.22	1.24	1.29	0.99	1.11	1.22
Arachidonic acid (C20:cis[5,8,11,14]4)	Complex lipids, fatty acids and related	Fatty acids, poly-unsaturated	1.61	1.92	1.74	1.09	1.04	1.08	1.05	1.31	0.98	1.1	1.06	1.18
dihomo-gamma-Linolenic acid (C20:cis[8,11,14]3)	Complex lipids, fatty acids and related	Fatty acids, poly-unsaturated	1.76	2.66	3.73	1.27	2.09	1.45	1.04	1.16	1.04	1.5	1.09	1.29
Docosahexaenoic acid (C22:cis[4,7,10,13,16,19]6)	Complex lipids, fatty acids and related	Fatty acids, poly-unsaturated	2.02	2.25	1.6	1.14	1.05	1.06	1.09	1.4	0.94	1.03	0.88	0.92
Docosapentaenoic acid (C22:cis[7,10,13,16,19]5)	Complex lipids, fatty acids and related	Fatty acids, poly-unsaturated	1.79	1.86	1.89	1.17	1.06	0.97	1.08	1.12	1.05	0.93	0.92	1.08
gamma-Linolenic acid (C18:cis[6,9,12]3)	Complex lipids, fatty acids and related	Fatty acids, poly-unsaturated	1.21	2.07	2.84	1.04	1.32	1.09	0.87	1.29	1.15	1.12	1.22	1.53
Linoleic acid (C18:cis[9,12]2)	Complex lipids, fatty acids and related	Fatty acids, poly-unsaturated	1.84	2.09	1.88	1.06	1.19	1.53	1.32	1.23	1.38	1.3	1	1.47
Behenic acid (C22:0)	Complex lipids, fatty acids and related	Fatty acids, saturated	1.79	1.74	1.54	1.15	1.26	1.21	1.17	1.27	1.07	1.12	1	1.09
Eicosanoic acid (C20:0)	Complex lipids, fatty acids and related	Fatty acids, saturated	1.21	1.46	1.76	0.94	1.17	1.36	0.89	1.15	1.23	0.68	1.05	0.99
Heneicosanoic acid (C21:0) (additional: Behenic acid (C22:0))	Complex lipids, fatty acids and related	Fatty acids, saturated	1.12	1.36	1.3	1.02	1.02	1.13	1.02	1.09	1.09	1.12	1.17	0.95
Heptadecanoic acid (C17:0)	Complex lipids, fatty acids and related	Fatty acids, saturated	1.61	1.8	1.55	1.19	1.12	1.12	1.06	1.12	1.07	1.05	1.05	1.04
Isopalmitic acid (C16:0)	Complex lipids, fatty acids and related	Fatty acids, saturated	1.37	1.68	1.76	0.81	1.03	1.78	1.2	1.33	1.05	1.18	0.89	1.29
Lignoceric acid (C24:0)	Complex lipids, fatty acids and related	Fatty acids, saturated	1.69	1.86	1.73	1.42	1.44	1.34	1.05	1.31	0.93	1.02	0.93	1.13
Myristic acid (C14:0)	Complex lipids, fatty acids and related	Fatty acids, saturated	1.71	1.58	1.57	1.01	0.97	1.16	1.41	1.35	1.05	1.01	0.82	1.43
Palmitic acid (C16:0)	Complex lipids, fatty acids and related	Fatty acids, saturated	1.9	1.96	1.81	1	1.05	1.18	1.25	1.21	1.18	1.08	1	1.34
Stearic acid (C18:0)	Complex lipids, fatty acids and related	Fatty acids, saturated	1.35	1.62	1.63	1.05	1.2	1.37	0.93	1.27	0.94	1.14	1.09	1.18
Tricosanoic acid (C23:0)	Complex lipids, fatty acids and related	Fatty acids, saturated	2.21	2.33	1.72	1.18	1.04	1.02	1.26	1.45	1.06	1.03	0.93	0.99
Dodecanol	Complex lipids, fatty acids and related	Fatty alcohols	1.86	1.79	1.35	1.07	1.09	0.95	1.4	1.57	0.99	1.16	1.24	1.05
Glycerol, lipid fraction	Complex lipids, fatty acids and related	Fatty alcohols	1.78	2.53	1.86	0.82	1.01	0.98	1.09	1.26	1.33	1.44	1.14	1.48
Hexadecanol	Complex lipids, fatty acids and related	Fatty alcohols	1.35	1.4	1.56	1.17	1.21	1.58	1.23	1.08	1.36	1.03	0.89	1.29
Galactose, lipid fraction	Complex lipids, fatty acids and related	Glycolipids	1.36	1.65	1.34	1.24	0.88	1.21	0.89	1.3	0.99	0.95	1.02	0.97
myo-Inositol, lipid fraction	Complex lipids, fatty acids and related	Glycolipids	1.55	1.72	1.63	1.28	1.18	1.19	1.05	1.25	1.04	0.94	1.03	1
Glycerol, polar fraction	Complex lipids, fatty acids and related	Lipid precursors	0.77	0.7	0.89	1	0.98	0.79	0.9	1.11	0.82	1.06	0.94	0.85
Glycerol-3-phosphate, polar fraction	Complex lipids, fatty acids and related	Lipid precursors	0.94	0.78	0.74	0.48	0.61	0.86	0.7	0.7	0.59	0.66	0.64	0.89
Lysophosphatidylcholine (C16:0)	Complex lipids, fatty acids and related	Lysophosphatidylcholines	1.03	1.13	1.03	0.91	0.84	0.93	0.81	1.01	1.22	0.83	0.89	1.02
Lysophosphatidylcholine (C17:0)	Complex lipids, fatty acids and related	Lysophosphatidylcholines	1.09	1.27	1.15	0.93	0.95	0.96	1.02	0.92	1.04	0.93	0.89	0.93
Lysophosphatidylcholine (C18:0)	Complex lipids, fatty acids and related	Lysophosphatidylcholines	0.99	1.01	0.98	0.98	0.99	0.99	1.01	1	1	0.99	0.98	1
Lysophosphatidylcholine (C18:1)	Complex lipids, fatty acids and related	Lysophosphatidylcholines	1.2	1.44	1.32	1.03	1.1	0.95	1.06	1.07	1.05	1	0.95	0.93
Lysophosphatidylcholine (C18:2)	Complex lipids, fatty acids and related	Lysophosphatidylcholines	1.02	1.02	1.09	1.03	0.97	1.08	0.95	0.95	0.93	1.04	1.14	1.11
Lysophosphatidylcholine (C20:4)	Complex lipids, fatty acids and related	Lysophosphatidylcholines	1.08	1.05	1.02	0.96	1	0.97	0.96	0.99	0.98	1.01	0.98	0.97
Lysophosphatidylethanolamine (C22:5)	Complex lipids, fatty acids and related	Lysophosphatidylethanolamines	1.09	1.31	1.25	0.8	0.9	0.87	1.03	1.14	1.06	0.8	1.08	0.78
Phosphatidylcholine (C16:0,C16:0)	Complex lipids, fatty acids and related	Phosphatidylcholines	1.14	1.13	1.22	0.9	0.84	0.94	0.98	0.9	1.02	0.84	1.01	1.02
Phosphatidylcholine (C16:0,C18:2)	Complex lipids, fatty acids and related	Phosphatidylcholines	1.03	1.02	1	1	1.03	0.98	1.01	1.01	1.01	1.02	1	0.99
Phosphatidylcholine (C16:0,C20:4) (additional: Phosphatidylcholine (C18:2,C18:2))	Complex lipids, fatty acids and related	Phosphatidylcholines	1.04	1.01	1.01	1	1.02	1.01	0.97	1.03	0.97	1.02	1.01	0.99
Phosphatidylcholine (C16:0,C20:5)	Complex lipids, fatty acids and related	Phosphatidylcholines	1.03	1.17	1.13	1.04	1.09	1.21	1	1.05	1.02	1.08	1.08	1.1
Phosphatidylcholine (C16:0,C22:6) (additional: Phosphatidylcholine (C18:2,C20:4))	Complex lipids, fatty acids and related	Phosphatidylcholines	1.19	1.13	1.08	1.03	1	0.98	1.04	1.06	1.07	0.97	0.94	0.95
Phosphatidylcholine (C16:1,C18:2)	Complex lipids, fatty acids and related	Phosphatidylcholines	1.75	1.83	2.15	1.32	0.89	1.01	1.04	1.41	1.39	1.31	1.27	1.46
Phosphatidylcholine (C18:0,C18:1)	Complex lipids, fatty acids and related	Phosphatidylcholines	1.33	1.56	1.37	1	1.24	1.23	0.99	1.2	1.06	1.12	1.13	1.11
Phosphatidylcholine (C18:0,C18:2)	Complex lipids, fatty acids and related	Phosphatidylcholines	1.25	1.07	1.03	1.03	1.18	1.1	1.01	1	1.16	1.13	1.02	1.02
Phosphatidylcholine (C18:0,C20:3) (additional: Phosphatidylcholine (C20:1,C18:2), Phosphatidylcholine (C20:2,C18:1))	Complex lipids, fatty acids and related	Phosphatidylcholines	0.98	1.12	1.18	0.99	1.14	1.07	0.95	1.11	0.93	1.1	1.08	1.02
Phosphatidylcholine (C18:0,C20:4)	Complex lipids, fatty acids and related	Phosphatidylcholines	0.99	0.99	0.97	0.99	1	0.99	0.99	1.01	1	0.99	1	0.99
Phosphatidylcholine (C18:0,C22:6)	Complex lipids, fatty acids and related	Phosphatidylcholines	1.16	1.08	0.99	1.04	0.88	0.93	1.07	1.1	0.95	0.93	0.84	0.96
Phosphatidylcholine (C18:1,C18:2) (additional: Phosphatidylcholine (C16:0,C20:3))	Complex lipids, fatty acids and related	Phosphatidylcholines	1.16	1.37	1.27	1.12	1.03	1.11	1	1.13	0.94	1.09	1	1.07
Phosphatidylcholine No 02	Complex lipids, fatty acids and related	Phosphatidylcholines	1.44	1.39	1.28	1.06	0.99	0.96	1.05	1.19	1.01	0.9	1.09	0.99
Glycerol phosphate, lipid fraction	Complex lipids, fatty acids and related	Phospholipid metabolites	1.86	1.85	1.87	1.04	1.2	1.03	1.06	1.38	0.94	1.06	0.99	1.14
myo-Inositol-2-phosphate, lipid fraction (myo-Inositolphospholipids)	Complex lipids, fatty acids and related	Phospholipid metabolites	2.1	2.39	1.82	1.4	1.32	0.99	1.21	1.62	1.14	1.18	0.94	1.22
Phosphate, lipid fraction	Complex lipids, fatty acids and related	Phospholipid metabolites	1.3	1.57	1.49	1.07	1.2	1.1	0.98	1.2	1.12	0.94	0.94	1.11
Choline plasmalogen (C18,C20:4)	Complex lipids, fatty acids and related	Plasmalogens	1.42	1.44	1.48	1.16	1.09	1.05	1.08	1.16	1.1	1.05	0.98	1.02
3-O-Methylsphingosine (d18:1) (additional: Sphingolipids, erythro-Sphingosine (d18:1), threo-Sphingosine (d18:1))	Complex lipids, fatty acids and related	Sphingolipids	2.44	2.34	2.05	1.52	1.64	1.52	1.15	1.75	0.98	0.75	1.06	1.23
4-Hydroxysphinganine (t18:0, Phytosphingosine), total	Complex lipids, fatty acids and related	Sphingolipids	1.84	2.45	1.9	1.3	1.21	1.34	1.04	1.44	1.03	1.02	0.76	1.21
5-O-Methylsphingosine (d18:1) (additional: Sphingolipids, erythro-Sphingosine (d18:1), threo-Sphingosine (d18:1))	Complex lipids, fatty acids and related	Sphingolipids	2.17	2.33	2.18	1.59	1.57	1.56	1.22	1.73	1.05	0.8	0.97	1.17
erythro-Sphingosine (d18:1) (additional: Sphingolipids)	Complex lipids, fatty acids and related	Sphingolipids	1.86	2.02	1.87	1.54	1.7	1.45	1.1	1.54	0.93	0.88	1.02	1.18
threo-Sphingosine (d18:1) (additional: Sphingolipids)	Complex lipids, fatty acids and related	Sphingolipids	1.84	1.81	1.82	1.43	1.54	1.33	1.1	1.39	1.07	0.89	0.99	1.16
Sphingomyelin (d18:1,C16:0)	Complex lipids, fatty acids and related	Sphingomyelins	1.18	0.97	1.09	1.16	1.34	1.06	1.02	0.97	1.62	1.01	1.04	1.01
Sphingomyelin (d18:1,C23:0)	Complex lipids, fatty acids and related	Sphingomyelins	1.55	1.6	1.42	1.2	1.06	1.1	0.92	1.28	1.18	1.04	1.07	1.16
Sphingomyelin (d18:1,C24:0)	Complex lipids, fatty acids and related	Sphingomyelins	1.38	1.28	1.34	1.22	1.35	1.25	0.95	1.14	1.07	1.13	1.1	1.1
Sphingomyelin (d18:2,C16:0)	Complex lipids, fatty acids and related	Sphingomyelins	1.55	1.68	1.46	1.49	1.05	1.46	0.93	1.18	1.28	1.26	1.11	1.06
Sphingomyelin (d18:2,C18:0)	Complex lipids, fatty acids and related	Sphingomyelins	1.19	1.34	1.31	1.2	1.19	1.43	1.09	1.03	0.79	1.14	0.84	0.99
TAG (C16:0,C16:1)	Complex lipids, fatty acids and related	Triacylglycerols	1.52	1.79	3.5	0.56	0.71	0.93	1.85	0.64	1.71	1.2	1.68	1.81
TAG (C16:0,C18:1,C18:3) (additional: TAG (C16:0,C18:2,C18:2), TAG (C16:1,C18:1,C18:2))	Complex lipids, fatty acids and related	Triacylglycerols	2.53	1.53	2.16	0.64	0.8	1.36	1.59	0.87	1.37	1.83	1.31	1.55
TAG (C16:0,C18:2)	Complex lipids, fatty acids and related	Triacylglycerols	2.38	2.01	2.31	0.64	0.91	1	1.49	0.83	2.15	1.19	1.04	1.15
TAG (C18:1,C18:2)	Complex lipids, fatty acids and related	Triacylglycerols	2.45	2.48	2.5	0.67	0.89	1.01	1.92	1.1	2.4	1.83	1.21	1.39
TAG (C18:2,C18:2)	Complex lipids, fatty acids and related	Triacylglycerols	2.88	2.08	2	0.82	0.94	1.02	1.3	1.11	2.07	1.76	1.24	1.51
TAG (C18:2,C18:3)	Complex lipids, fatty acids and related	Triacylglycerols	3.4	2.57	2.99	0.61	0.7	1.1	1.21	1.35	2.34	1.7	1.46	2.66
Citrate	Energy metabolism and related	Citrate cycle	0.79	0.89	0.89	0.87	0.88	0.95	0.96	1.04	0.8	1.06	1.12	0.81
Malate	Energy metabolism and related	Citrate cycle	0.55	0.77	0.82	1.03	0.79	0.73	0.87	1.03	0.73	1	1.58	0.85
Succinate	Energy metabolism and related	Citrate cycle	1.13	1.37	1.04	0.94	1.02	1.01	1.05	0.92	1.16	0.98	0.97	1.03
2-Hydroxybutyrate	Energy metabolism and related	Energy metabolism, miscellaneous	0.37	0.33	0.36	0.75	0.64	0.67	0.59	0.81	0.5	0.83	0.99	0.64
3-Phosphoglycerate (3-PGA)	Energy metabolism and related	Glycolysis/Gluconeogenesis	0.68	0.64	1.34	0.77	0.62	2.12	0.55	0.75	0.63	0.81	0.88	0.98
Fructose-6-phosphate (additional: Glucose-6-phosphate, myo-Inositol-1-phosphate, myo-Inositol-2-phosphate, myo-Inositol-4-phosphate)	Energy metabolism and related	Glycolysis/Gluconeogenesis	1.35	0.92	0.65	0.87	0.64	0.78	0.85	0.71	0.44	0.81	0.75	1.04
Lactate	Energy metabolism and related	Glycolysis/Gluconeogenesis	0.5	0.6	0.66	0.78	0.86	1	0.51	0.92	0.56	0.85	1.8	0.52
Pyruvate (additional: Phosphoenolpyruvate (PEP))	Energy metabolism and related	Glycolysis/Gluconeogenesis	0.56	0.57	0.39	0.91	0.89	0.75	0.67	1.12	0.86	0.99	1.45	0.75
3-Hydroxybutyrate	Energy metabolism and related	Ketone bodies	1.05	0.98	1.03	0.97	0.74	0.83	1.05	1.16	1.01	1	0.87	0.89
3,4-Dihydroxyphenylacetic acid (DOPAC)	Hormones, signal substances and related	Catecholamine catabolites	0.74	1.33	1.2	1.28	1.21	0.98	1.13	1.12	0.95	1.03	0.99	1.15
3,4-Dihydroxyphenylglycol (DOPEG)	Hormones, signal substances and related	Catecholamine catabolites	0.97	1.3	0.98	1.2	1.1	0.75	1.1	1.26	0.96	1.19	1	0.96
3-Methoxytyrosine	Hormones, signal substances and related	Catecholamine catabolites	1.11	1.29	1.25	1.11	1.38	0.98	1.06	1.03	1.18	1.04	1.07	1.08
4-Hydroxy-3-methoxyphenylglycol (HMPG)	Hormones, signal substances and related	Catecholamine catabolites	0.78	0.99	0.94	1.2	1.26	0.98	1.13	1.26	1.29	1.1	1.2	0.87
Homovanillic acid (HVA)	Hormones, signal substances and related	Catecholamine catabolites	0.8	1.42	1.03	0.88	1.19	0.93	1.29	1.46	0.91	1.17	1.02	0.68
Metanephrine	Hormones, signal substances and related	Catecholamine catabolites	0.81	0.83	0.59	0.8	0.57	0.94	0.88	1.17	0.65	0.89	0.65	0.91
Normetanephrine	Hormones, signal substances and related	Catecholamine catabolites	0.71	0.77	0.86	0.82	0.79	0.94	0.92	0.9	0.89	0.86	0.89	0.85
3,4-Dihydroxyphenylalanine (DOPA)	Hormones, signal substances and related	Catecholamine precursors	0.95	1.14	0.87	1.22	0.97	0.83	1.22	1.23	1.26	1.07	0.99	0.78
Adrenaline (Epinephrine)	Hormones, signal substances and related	Catecholamines	0.87	0.5	1.05	1.07	0.75	0.93	0.73	1.41	0.73	1.69	0.81	1.56
Dopamine	Hormones, signal substances and related	Catecholamines	0.73	1.23	0.91	0.58	0.62	0.98	0.71	1.26	0.71	1.04	0.55	0.93
Noradrenaline (Norepinephrine)	Hormones, signal substances and related	Catecholamines	0.84	0.94	0.93	1.2	0.71	0.85	1.2	1.37	0.99	0.86	0.91	0.9
Histamine	Hormones, signal substances and related	Other hormones, signal substances and related	1.13	1.55	1.15	0.73	0.6	0.8	0.72	0.86	0.55	0.61	0.57	0.87
Serotonin (5-HT)	Hormones, signal substances and related	Serotonin and serotonin metabolism	2.37	3.13	1.74	0.76	0.47	0.32	1.73	2.08	1.16	0.64	0.72	1.13
18-Hydroxy-11-deoxycorticosterone	Hormones, signal substances and related	Steroids and related	0.7	1.12	1.09	2.22	0.71	0.34	0.59	1.64	1.67	0.5	0.47	0.27
21-Hydroxyprogesterone (11-Deoxycorticosterone)	Hormones, signal substances and related	Steroids and related	0.98	0.91	1.8	2.65	1.44	0.47	0.33	1.35	1.49	0.48	0.6	0.21
Androstenedione	Hormones, signal substances and related	Steroids and related	0.63	1.23	1	2.14	0.1	1.13	1.89	1.73	1.74	1.75	1.04	2.79
Corticosterone	Hormones, signal substances and related	Steroids and related	0.88	2.48	1.54	2.13	0.8	0.5	0.58	1.63	1.76	0.42	0.58	0.39
Progesterone	Hormones, signal substances and related	Steroids and related	0.85	0.18	0.74	1.77	1.28	0.36	1.3	1.23	0.61	0.6	0.39	0.09
Testosterone	Hormones, signal substances and related	Steroids and related	0.47	1.03	0.73	1.16	0.11	1.09	0.76	0.55	0.6	2.22	1.11	1.87
beta-Sitosterol	Miscellaneous	Diet related	1.49	2.06	2.27	1.22	1.14	0.9	1.3	1.95	1.51	1.02	0.88	1.03
Campesterol	Miscellaneous	Diet related	1.28	1.87	1.73	1.2	1.01	0.76	1.23	1.75	1.22	1	0.72	1
Glycolate	Miscellaneous	Miscellaneous	0.79	1.1	1.22	1.27	1.05	1.19	1.01	1.27	1	1.47	1.11	1.07
Hippuric acid	Miscellaneous	Miscellaneous	0.26	0.53	0.29	0.78	1.42	0.59	0.5	1.37	0.67	2.31	2.44	0.56
Phosphate (inorganic and from organic phosphates)	Miscellaneous	Miscellaneous	0.73	0.82	0.86	0.94	1.02	1.09	0.84	0.87	1.32	1.08	1.05	1.25
Salicylic acid	Miscellaneous	Miscellaneous	0.48	0.83	0.89	1.1	0.6	0.97	0.92	0.71	0.97	1.12	1.12	1.5
Spermidine	Miscellaneous	Polyamines	0.94	0.62	1.15	1.07	1.18	0.93	1.02	0.91	0.55	1.09	1.02	0.56
Allantoin	Nucleobases and related	Purine metabolism	0.74	0.83	0.93	0.72	0.8	0.74	0.97	0.9	0.66	1.17	1.14	0.66
Uric acid	Nucleobases and related	Purine metabolism	0.86	0.77	1.1	0.7	0.81	1.15	0.93	0.77	0.57	0.79	0.97	0.63
Cytosine (additional: 2'-Deoxycytidine)	Nucleobases and related	Pyrimidine metabolism	0.96	0.93	0.82	0.93	1.08	0.86	0.96	1.13	0.81	1.12	1.1	0.98
Pseudouridine	Nucleobases and related	Pyrimidine metabolism	0.86	0.91	0.84	0.92	0.91	0.79	0.84	1.12	0.78	1.12	1.02	0.89
Uracil	Nucleobases and related	Pyrimidine metabolism	0.95	1.05	0.87	0.87	0.96	0.93	0.86	1.03	0.81	0.84	1.11	0.85
Unknown lipid (28000473)	Unknown	Unknown lipid	1.5	2.38	2.32	1.04	1.04	1.03	1.02	1.35	1.04	0.95	0.76	0.84
Unknown lipid (68000015)	Unknown	Unknown lipid	1.24	1.2	1.09	1.28	0.87	0.97	1.03	0.93	1.05	0.98	0.95	1.03
Unknown lipid (68000017)	Unknown	Unknown lipid	1.5	1.67	1.31	1.17	1.35	1.38	1.21	1.19	1.27	0.99	1.07	1.22
Unknown lipid (68000020)	Unknown	Unknown lipid	0.98	1.33	1.38	0.95	1.02	1.18	0.96	1.21	1.02	1.03	0.98	1.17
Unknown lipid (68000028)	Unknown	Unknown lipid	1.6	1.82	3.06	0.53	0.92	1.13	1.83	0.95	2.74	1.3	2.07	2.14
Unknown lipid (68000033)	Unknown	Unknown lipid	0.78	0.95	0.95	0.74	0.72	0.78	1.11	0.93	0.91	0.74	0.86	0.73
Unknown lipid (68000034)	Unknown	Unknown lipid	1.01	1.11	0.95	1.03	0.91	0.78	0.95	1.01	1.03	0.96	0.92	0.86
Unknown lipid (68000035)	Unknown	Unknown lipid	1.18	1.24	1.23	0.96	1.03	1.04	0.99	0.99	1.1	1.06	1.09	1.09
Unknown lipid (68000038)	Unknown	Unknown lipid	1.22	1.38	1.15	0.91	0.83	0.79	1.18	1.02	1.13	0.94	0.84	0.85
Unknown lipid (68000045)	Unknown	Unknown lipid	0.89	0.86	0.67	1.47	0.97	0.95	0.97	1.02	0.69	0.9	0.89	0.64
Unknown lipid (68000047)	Unknown	Unknown lipid	1.39	1.53	1.33	1.21	1.05	0.91	1.06	1.15	1.24	1.08	1.04	0.98
Unknown lipid (68000052)	Unknown	Unknown lipid	1	1	1.02	0.96	1.02	1.01	0.99	1	1.03	1	1.01	1
Unknown lipid (68000056)	Unknown	Unknown lipid	3.53	1.29	2.69	0.98	0.68	1.04	2.05	0.85	1.91	1.68	1.65	1.91
Unknown lipid (68000058)	Unknown	Unknown lipid	1.26	3.04	2.07	0.81	0.69	1.13	1.57	1.17	2.08	1.36	1.04	1.74
Unknown lipid (68000059)	Unknown	Unknown lipid	2.55	2.84	2.07	0.68	1.11	1.08	1.42	1.05	2.02	1.75	1.23	1.7
Unknown lipid (68000060)	Unknown	Unknown lipid	1.59	1.66	1.36	0.79	0.74	0.82	1	0.85	1.06	0.8	0.74	0.88
Unknown polar (38000389)	Unknown	Unknown polar	2.65	0.42	0.86	1.25	1.81	0.56	0.88	0.99	0.82	1.85	2.01	0.56
Unknown polar (38000433)	Unknown	Unknown polar	1.23	0.82	0.7	0.8	1.09	0.97	1	1.3	0.96	0.92	1.19	0.9
Unknown polar (38000449)	Unknown	Unknown polar	3.18	0.47	0.9	1.26	1.4	0.6	1.56	1.07	0.74	1.79	2.63	0.67
Unknown polar (58000010)	Unknown	Unknown polar	1.07	1.28	1.13	1.01	1.12	0.95	1.07	1.49	0.91	0.93	0.97	1.23
Unknown polar (58000013)	Unknown	Unknown polar	1.73	1.94	1.05	1.08	0.99	1.03	1.32	1.33	1.85	1	0.92	1.14
Unknown polar (58000014)	Unknown	Unknown polar	1.01	1.05	0.53	0.67	0.84	0.87	1.03	1.74	1.13	0.84	1.07	0.89
Unknown polar (58000017)	Unknown	Unknown polar	NA	NA	NA	1.51	NA	0.59	NA	NA	NA	0.85	1.82	1.28
Unknown polar (58000018)	Unknown	Unknown polar	1.22	1.15	1.13	0.96	1.03	1.01	1.21	0.66	1.48	0.91	0.95	0.97
Unknown polar (58000019)	Unknown	Unknown polar	2.31	1.54	1.22	0.84	0.82	1.08	1.27	1.09	1.48	1.1	1.02	0.92
Unknown polar (58000132)	Unknown	Unknown polar	0.98	0.91	1.12	0.85	1	0.91	1.13	0.93	1.16	1.23	0.95	0.85
Unknown polar (58000133)	Unknown	Unknown polar	1.14	1.09	1.04	0.87	0.91	0.92	1.25	0.78	1.12	1.03	0.95	0.91
Unknown polar (58000136)	Unknown	Unknown polar	0.99	1.17	0.92	0.85	0.92	1.03	0.92	0.89	1.1	1.05	1.06	0.85
Unknown polar (58000140)	Unknown	Unknown polar	0.79	1.33	0.75	0.81	1.23	0.95	0.97	1.12	0.88	0.88	0.93	0.94
Unknown polar (58000141)	Unknown	Unknown polar	1.09	1.32	1.17	0.91	0.95	0.94	1.08	0.74	1.56	1.04	1	0.95
Unknown polar (58000142)	Unknown	Unknown polar	0.69	0.86	1.09	0.81	1.03	0.88	1.11	1.01	0.94	0.9	1	1.05
Unknown polar (58000143)	Unknown	Unknown polar	1.67	1.12	1.13	0.87	1.14	0.93	1.35	0.94	1.56	0.73	1.07	0.81
Unknown polar (58000144)	Unknown	Unknown polar	1.31	1.18	0.92	0.91	0.98	1.06	0.93	0.91	1.93	0.99	0.98	1.2
Unknown polar (58000145)	Unknown	Unknown polar	1.01	0.91	1.41	0.84	1.04	1.02	1.11	0.85	1.2	1.07	0.87	1.06
Unknown polar (58000146)	Unknown	Unknown polar	1.39	1.2	0.79	0.99	0.91	1.1	1.54	0.95	1.51	1	0.87	1.24
Unknown polar (58000147)	Unknown	Unknown polar	1.23	1.24	0.97	0.74	0.94	1	1.51	1.04	1.11	0.98	0.84	1.06
Unknown polar (58000148)	Unknown	Unknown polar	1.18	1.1	1.15	0.95	0.99	1.09	1.02	1.02	1.22	1.09	1.12	0.88
Unknown polar (58000149)	Unknown	Unknown polar	1.04	1.54	1.06	1.06	1.02	1.06	1.1	0.76	1.21	1.1	1.03	1.11
Unknown polar (58000152)	Unknown	Unknown polar	1.01	1.1	1.08	0.85	0.86	0.86	0.96	1.05	1.47	1.12	1.26	0.84
Unknown polar (58000153)	Unknown	Unknown polar	0.97	1.06	1.23	1.07	1.06	0.99	0.8	0.82	1.22	1.04	1	1.14
Unknown polar (58000154)	Unknown	Unknown polar	1.03	1.26	1.06	0.87	1.03	1	1.08	1.08	1.28	0.79	1.1	1.05
Unknown polar (58000155)	Unknown	Unknown polar	1.27	0.8	1	0.91	1.06	1.07	1.02	0.76	1.32	1.01	0.95	1.14
Unknown polar (58000156)	Unknown	Unknown polar	1.1	1.24	1.12	1.03	0.92	0.99	1.02	0.78	1.32	1.06	0.97	1.09
Unknown polar (58000157)	Unknown	Unknown polar	1.18	0.83	1.18	0.9	1.01	1.01	1.42	0.69	1.27	1.02	1.02	1.11
Unknown polar (58000158)	Unknown	Unknown polar	0.93	1.44	1.02	0.41	1.69	0.99	1.04	0.84	0.91	0.68	1.12	0.81
Unknown polar (58000159)	Unknown	Unknown polar	0.91	1.06	1.09	0.98	1.04	0.89	0.99	0.96	0.7	1	0.91	1.22
Unknown polar (58000160)	Unknown	Unknown polar	1.15	0.99	0.94	0.87	0.99	0.96	0.97	1.21	1.31	1.09	0.91	1.05
Unknown polar (58000161)	Unknown	Unknown polar	1.38	1.05	1.23	0.68	0.94	1.1	0.83	1.19	1.26	0.95	0.91	1.28
Unknown polar (58000162)	Unknown	Unknown polar	1.43	0.49	0.75	0.83	1.08	0.93	1.04	0.69	1.17	0.97	1.05	0.96
Unknown polar (58000164)	Unknown	Unknown polar	1.07	0.78	0.91	0.86	0.96	1.01	0.88	0.74	1.19	1.09	0.93	1.13
Unknown polar (58000165)	Unknown	Unknown polar	1.14	0.81	0.99	0.93	0.93	0.91	0.84	0.8	0.96	0.93	0.92	1.03
Unknown polar (58000166)	Unknown	Unknown polar	1.24	1.11	1.29	0.95	1.02	1.11	1.03	1.06	1.1	1.03	0.89	1.12
Unknown polar (58000167)	Unknown	Unknown polar	1.31	1.1	0.99	1	0.87	1.07	0.97	0.84	1.03	1.04	1.05	1.02
Unknown polar (58000168)	Unknown	Unknown polar	1.03	0.74	0.97	0.96	1.09	0.86	1.16	1.06	0.9	0.98	1.23	1.07
Unknown polar (58000169)	Unknown	Unknown polar	1	0.71	0.92	0.8	1	1.02	1.39	1.01	0.85	0.98	0.91	1
Unknown polar (58000170)	Unknown	Unknown polar	0.92	0.88	0.86	0.96	0.94	0.99	1.23	0.91	0.92	1.05	1.02	1.44
Unknown polar (58000171)	Unknown	Unknown polar	0.99	1.03	0.98	0.98	1.09	0.98	0.99	1.01	1.05	1.01	1.08	1.09
Unknown polar (58000172)	Unknown	Unknown polar	0.81	0.91	0.92	1.2	1	0.83	0.87	1.27	1.02	1.04	0.91	1
Pantothenic acid	Vitamins, cofactors and related	Acyl-carriers and related	0.69	0.66	1.23	0.67	1.04	1.36	0.97	1.19	1.08	1.04	1.02	1.25
Ascorbic acid (additional: Glucose)	Vitamins, cofactors and related	Ascorbic acid and related	0.92	1.14	0.95	0.88	0.92	0.92	0.83	1.06	0.88	0.93	1.11	0.96
Threonic acid	Vitamins, cofactors and related	Ascorbic acid and related	1.52	1.69	1.2	1.08	1.26	1.29	1.03	1.39	0.93	0.92	1.41	1.18
Coenzyme Q9	Vitamins, cofactors and related	Redox-carrier and related	1.86	1.77	2.26	0.72	0.81	0.9	1	1.18	1.22	1.15	1.05	1.01
alpha-Tocopherol	Vitamins, cofactors and related	Tocopherols and related	1.6	1.55	1.32	1.05	1.07	1.07	0.94	1.2	0.98	1.1	1.15	1.16

## Sheet: Cyclosporin A
Profile name:	Cyclosporin A
pValue:	0.05
			Cyclosporin A (MOA35) HD	Cyclosporin A (MOA35) HD	Cyclosporin A (MOA35) HD	Cyclosporin A (MOA35) HD	Cyclosporin A (MOA35) HD	Cyclosporin A (MOA35) HD	Cyclosporin A (MOA35) LD	Cyclosporin A (MOA35) LD	Cyclosporin A (MOA35) LD	Cyclosporin A (MOA35) LD	Cyclosporin A (MOA35) LD	Cyclosporin A (MOA35) LD
Metabolite	Class	Subclass	f7	f14	f28	m7	m14	m28	f7	f14	f28	m7	m14	m28
Threonine	Amino acids	Amino acids, neutral	1.87	2.13	2.06	1.41	1.49	1.42	1.35	1.5	1.52	1.33	1.44	1.29
Tryptophan	Amino acids	Amino acids, aromatic	0.65	0.61	0.6	0.93	0.64	0.8	0.76	0.79	0.81	0.84	0.71	0.78
Arginine	Amino acids	Amino acids, basic	1.1	0.9	1.13	0.99	0.89	0.97	0.9	0.95	1.03	0.89	1.11	1.17
Citrulline	Amino acids related	Urea cycle and related	1.36	1.42	1.57	0.91	1	1.22	1.05	1.31	1.26	0.98	1.12	1.36
Glutamate	Amino acids	Amino acids, acidic	1.1	1.24	1.11	0.92	0.92	0.92	0.98	1.03	1.11	0.91	1.06	1.16
Phenylalanine	Amino acids	Amino acids, aromatic	1.04	1	1.02	1.08	0.94	1.08	0.79	1	0.84	1.01	0.96	0.94
alpha-Tocopherol	Vitamins, cofactors and related	Tocopherols and related	0.94	0.93	0.83	0.94	1.05	1.16	0.94	1.06	0.99	1.11	1.35	1.3
Pantothenic acid	Vitamins, cofactors and related	Acyl-carriers and related	1.2	1.59	1.88	1.16	1.69	2.39	1.06	1.15	1.29	1.4	1.93	2.06
Taurine	Amino acids	Amino acids, S-containing	0.84	1.28	0.92	0.8	1.08	1.21	0.88	1.14	0.94	0.84	1.17	1.12
Malate	Energy metabolism and related	Citrate cycle	0.7	0.64	0.68	0.87	0.74	0.87	0.81	0.54	0.79	0.85	1.1	1.25
Fructose-6-phosphate (additional: Glucose-6-phosphate, myo-Inositol-1-phosphate, myo-Inositol-2-phosphate, myo-Inositol-4-phosphate)	Energy metabolism and related	Glycolysis/Gluconeogenesis	0.48	1.65	1.29	0.92	1.15	1.3	0.61	1.27	1.45	0.85	0.98	1.36
Salicylic acid	Miscellaneous	Miscellaneous	0.79	1.1	0.99	0.95	1.12	1.03	0.85	1.15	1.1	1.03	0.97	0.96
Coenzyme Q9	Vitamins, cofactors and related	Redox-carrier and related	1.56	1.58	1.75	1.39	1.48	1.6	1.02	1.18	1.41	1.18	1.28	1.46
Cholic acid	Complex lipids, fatty acids and related	Bile acids	3.49	16.32	0.26	47.16	8.33	49.22	0.3	5.01	0.56	18.83	14.09	193.86
Creatinine	Amino acids related	Creatine metabolism	1.19	1.2	0.93	0.99	1.01	1.05	0.83	0.93	0.86	0.88	0.9	0.93
Creatine	Amino acids related	Creatine metabolism	1.11	1.37	1.17	1.14	1.46	1.24	0.92	1.04	0.95	0.98	1.5	1.12
Kynurenic acid	Amino acids related	Tryptophan metabolism	NA	NA	NA	NA	NA	NA	NA	NA	1.24	NA	NA	NA
Taurocholic acid	Complex lipids, fatty acids and related	Bile acids	NA	NA	NA	NA	NA	NA	NA	NA	NA	NA	NA	NA
Glycochenodeoxycholic acid (additional: Glycodeoxycholic acid)	Complex lipids, fatty acids and related	Bile acids	NA	NA	NA	NA	NA	NA	NA	NA	NA	NA	NA	NA
Glycerol, lipid fraction	Complex lipids, fatty acids and related	Fatty alcohols	2.11	1.99	2.09	2.34	1.7	1.97	1.51	2.16	2.02	2.16	1.47	1.8
Palmitic acid (C16:0)	Complex lipids, fatty acids and related	Fatty acids, saturated	1.57	1.57	1.65	1.43	1.38	1.43	1.2	1.32	1.47	1.41	1.33	1.37
Linoleic acid (C18:cis[9,12]2)	Complex lipids, fatty acids and related	Fatty acids, poly-unsaturated	1.74	1.71	1.8	2.04	1.74	1.75	1.5	1.52	1.77	1.7	1.93	1.46
Oleic acid (C18:cis[9]1)	Complex lipids, fatty acids and related	Fatty acids, mono-unsaturated	1.48	1.59	1.73	1.73	1.54	1.65	1.32	1.45	1.55	1.57	1.6	1.37
Stearic acid (C18:0)	Complex lipids, fatty acids and related	Fatty acids, saturated	1.13	1.21	1.34	1.08	1.24	1.16	1.15	1.13	1.25	1.04	1.15	1.24
Arachidonic acid (C20:cis[5,8,11,14]4)	Complex lipids, fatty acids and related	Fatty acids, poly-unsaturated	1.33	1.3	1.31	1.11	1.14	1.05	1.08	1.09	1.18	1.13	1.16	1.25
Docosahexaenoic acid (C22:cis[4,7,10,13,16,19]6)	Complex lipids, fatty acids and related	Fatty acids, poly-unsaturated	1.98	2.02	1.99	2.04	2.05	1.82	1.54	1.93	1.63	1.82	1.89	1.63
Cholesterol, total	Complex lipids, fatty acids and related	Cholesterol and related	1.15	1.22	1.27	1.05	1.1	1.09	1.03	1.01	1.14	1.16	1.07	1.12
beta-Sitosterol	Miscellaneous	Diet related	1.65	2.15	2.11	1.2	1.76	1.75	1.37	1.85	1.79	1.34	1.97	1.71
Glycerol phosphate, lipid fraction	Complex lipids, fatty acids and related	Phospholipid metabolites	1.51	1.48	1.09	1.25	1.26	1.26	1.2	1.19	1.29	1.1	1.12	1.47
Galactose, lipid fraction	Complex lipids, fatty acids and related	Glycolipids	1.08	1.11	0.94	1.15	0.89	0.93	1.22	1.07	1.22	1.11	0.97	1.12
Lignoceric acid (C24:0)	Complex lipids, fatty acids and related	Fatty acids, saturated	1.01	1.06	0.92	1.01	1.04	0.94	0.98	1	1.03	1.17	1.17	1.26
Campesterol	Miscellaneous	Diet related	1.21	1.34	1.37	1	1.25	1.24	1.19	1.32	1.39	1.24	1.53	1.67
Hexadecanol	Complex lipids, fatty acids and related	Fatty alcohols	1.11	1.03	1.01	1.02	1.18	0.85	0.83	0.74	0.88	1.21	1.35	0.92
Heneicosanoic acid (C21:0) (additional: Behenic acid (C22:0))	Complex lipids, fatty acids and related	Fatty acids, saturated	1.08	1.23	0.97	0.98	1.02	0.99	1.01	1.09	1.16	1.12	1.16	1.26
Dodecanol	Complex lipids, fatty acids and related	Fatty alcohols	1	1.22	1	1.09	1.31	1.1	1.06	1.33	1.15	1.22	1.29	1.33
Heptadecanoic acid (C17:0)	Complex lipids, fatty acids and related	Fatty acids, saturated	1.22	1.13	1.26	1.14	1.28	1.22	1.1	1.18	1.41	1.09	1.26	1.29
Eicosanoic acid (C20:0)	Complex lipids, fatty acids and related	Fatty acids, saturated	1.72	1.92	1.82	1.65	1.86	1.46	1.36	1.73	1.65	2.06	2.3	2.09
Tricosanoic acid (C23:0)	Complex lipids, fatty acids and related	Fatty acids, saturated	0.81	1.04	0.75	0.71	0.83	0.89	0.94	0.97	1.11	0.87	1.02	0.99
Phosphate, lipid fraction	Complex lipids, fatty acids and related	Phospholipid metabolites	1.38	1.31	1.11	1.15	1.12	1.04	1.15	1.1	1.24	1.22	1.19	1.1
Myristic acid (C14:0)	Complex lipids, fatty acids and related	Fatty acids, saturated	1.29	1.12	1.29	1.22	1.16	0.82	1.19	1.07	1.26	1.05	1.03	0.92
myo-Inositol-2-phosphate, lipid fraction (myo-Inositolphospholipids)	Complex lipids, fatty acids and related	Phospholipid metabolites	1.15	1.39	0.93	1.24	1.44	0.9	1.07	0.84	0.83	1.07	1.07	1.48
Behenic acid (C22:0)	Complex lipids, fatty acids and related	Fatty acids, saturated	1.16	1.24	0.91	1.09	1.36	1.05	1.05	1.18	1.16	1.27	1.45	1.34
4-Hydroxysphinganine (t18:0, Phytosphingosine), total	Complex lipids, fatty acids and related	Sphingolipids	1.34	1.41	1.36	1.54	1.25	1.3	1.24	1.21	1.45	1.35	1.66	1.57
Nervonic acid (C24:cis[15]1)	Complex lipids, fatty acids and related	Fatty acids, mono-unsaturated	1.14	1.02	1.11	0.88	1.05	0.83	1.02	0.98	1.09	0.73	0.83	0.94
Urea	Amino acids related	Urea cycle and related	1.4	1.36	1.25	1.27	1.42	1.51	1.03	0.96	1.09	1.11	0.98	1.03
Isopalmitic acid (C16:0)	Complex lipids, fatty acids and related	Fatty acids, saturated	0.9	0.82	1.02	0.9	1	0.87	0.9	0.82	1.09	1.29	1.21	1.22
Palmitoleic acid (C16:cis[9]1)	Complex lipids, fatty acids and related	Fatty acids, mono-unsaturated	1.11	1.12	0.91	1.06	0.75	0.68	1.01	1.08	1.19	1.49	0.98	0.88
Unknown lipid (28000473)	Unknown	Unknown lipid	1.27	1.31	1.39	0.63	0.88	0.63	1.52	1.14	1.16	0.74	0.77	0.79
14-Methylhexadecanoic acid	Complex lipids, fatty acids and related	Fatty acids, branched	1.1	1.07	1.06	1.04	0.9	1.17	1.06	1.17	1.13	1.35	1.12	1.14
gamma-Linolenic acid (C18:cis[6,9,12]3)	Complex lipids, fatty acids and related	Fatty acids, poly-unsaturated	1.95	2.08	2.18	2.22	1.91	2.59	1.42	1.6	1.54	2.14	1.72	1.9
16-Methylheptadecanoic acid	Complex lipids, fatty acids and related	Fatty acids, branched	1.04	0.99	1.16	1.05	0.82	0.95	0.99	0.9	1.16	1.43	0.91	1.02
17-Methyloctadecanoic acid	Complex lipids, fatty acids and related	Fatty acids, branched	1.09	1.14	1.37	1.08	1.02	0.95	1.19	1.07	1.51	1.41	1.1	1.34
dihomo-gamma-Linolenic acid (C20:cis[8,11,14]3)	Complex lipids, fatty acids and related	Fatty acids, poly-unsaturated	1.39	1.41	1.42	1.72	1.96	2.34	1.16	1.11	1.26	1.7	1.75	2.08
Eicosaenoic acid (C20:1) No 02	Complex lipids, fatty acids and related	Fatty acids, mono-unsaturated	0.69	2.45	1.28	0.47	1.06	0.69	0.68	1.18	1.95	2.24	1.46	2.43
3-O-Methylsphingosine (d18:1) (additional: Sphingolipids, erythro-Sphingosine (d18:1), threo-Sphingosine (d18:1))	Complex lipids, fatty acids and related	Sphingolipids	1.03	0.94	0.93	0.85	0.96	0.78	1.06	0.94	1.04	0.85	1.01	1.15
threo-Sphingosine (d18:1) (additional: Sphingolipids)	Complex lipids, fatty acids and related	Sphingolipids	1	0.95	0.94	0.96	0.96	0.85	1.02	0.95	0.91	0.88	0.97	1.16
Docosapentaenoic acid (C22:cis[7,10,13,16,19]5)	Complex lipids, fatty acids and related	Fatty acids, poly-unsaturated	2.06	2.14	2.57	2.22	1.84	1.62	1.73	1.76	1.84	1.94	1.69	1.47
5-O-Methylsphingosine (d18:1) (additional: Sphingolipids, erythro-Sphingosine (d18:1), threo-Sphingosine (d18:1))	Complex lipids, fatty acids and related	Sphingolipids	1.17	1.02	1.09	0.98	1.02	0.8	1.11	0.84	1.11	0.91	1.02	1.15
erythro-Sphingosine (d18:1) (additional: Sphingolipids)	Complex lipids, fatty acids and related	Sphingolipids	1.14	0.95	0.96	0.93	0.96	0.77	1.06	0.88	0.99	0.88	0.97	1.04
Elaidic acid (C18:trans[9]1)	Complex lipids, fatty acids and related	Fatty acids, mono-unsaturated	1.11	1.34	0.88	0.93	0.99	0.91	1.14	1.4	1.05	1.11	1.43	1.45
myo-Inositol, lipid fraction	Complex lipids, fatty acids and related	Glycolipids	1.06	1.09	0.92	1.01	1.08	0.89	1.03	1.04	1.21	0.99	1.02	1.11
Pyruvate (additional: Phosphoenolpyruvate (PEP))	Energy metabolism and related	Glycolysis/Gluconeogenesis	0.71	0.7	0.57	0.82	0.85	0.8	0.79	0.62	0.71	0.8	0.7	1.04
Alanine	Amino acids	Amino acids, neutral	1.05	1.08	1.03	1.09	0.95	1.13	1.01	1.15	1.04	1.15	1.22	1.23
Glycine	Amino acids	Amino acids, neutral	1.41	1.52	1.28	1.07	1.16	1.09	1.17	1.18	1.17	1.1	1.08	1.21
Methionine	Amino acids	Amino acids, S-containing	1.08	1.14	1.19	1.08	1.02	1.05	0.94	1	0.99	1.07	1.04	0.95
5-Oxoproline (additional: Folic acid, Glutamate, Glutamine)	Amino acids related	Amino acid metabolites	1.11	1.02	1	0.94	0.9	0.94	1.24	1.09	1.03	0.92	0.96	1
Cysteine (additional: Cystine)	Amino acids	Amino acids, S-containing	0.84	0.63	0.76	1.22	0.97	0.82	1.13	0.81	1	0.97	1.02	1.14
Citrate	Energy metabolism and related	Citrate cycle	1.08	1.14	1.04	0.83	1.03	1.07	1.1	1.16	1.17	0.94	1.01	1.11
Lysine	Amino acids	Amino acids, basic	0.98	1.05	1.11	1.18	1.29	1.07	1.13	1.36	1.23	1.14	1.19	1.34
myo-Inositol	Carbohydrates and related	Polyols	0.85	1.13	1.09	0.84	1.18	1.31	0.87	1.04	1.11	0.76	1.06	1.17
Sucrose	Carbohydrates and related	Disaccharides	0.83	1.11	1.27	0.89	0.99	1.02	2.42	0.88	0.67	0.63	1.02	0.46
Mannose	Carbohydrates and related	Monosaccharides	1	0.98	0.94	1.04	0.79	0.85	1.2	1.17	1.14	1.23	0.89	1.16
Glucose (additional: Galactose, Gluconic acid, Mannitol)	Carbohydrates and related	Monosaccharides	0.95	0.9	0.73	1.05	0.89	1.02	1.02	0.83	1.03	1.22	0.86	1.23
Glycerol, polar fraction	Complex lipids, fatty acids and related	Lipid precursors	1.04	1.01	0.93	0.88	0.89	0.89	1.07	1.03	0.99	0.87	0.84	1.06
Spermidine	Miscellaneous	Polyamines	0.73	0.94	0.85	0.67	1.19	0.83	0.81	0.96	1.21	0.73	1.07	0.82
Glutamine	Amino acids	Amino acids, basic	1.02	0.96	0.96	1.01	0.92	0.89	0.96	1.11	1.09	1.01	0.87	0.93
Ornithine (additional: Arginine, Citrulline)	Amino acids related	Urea cycle and related	1.02	1.12	1.1	1.21	1.1	1.22	1.02	1.1	1.05	1.29	1.19	1.43
Phosphate (inorganic and from organic phosphates)	Miscellaneous	Miscellaneous	1.14	1.29	1.26	1.15	1.26	1.25	1.12	1.14	0.99	0.94	1.07	1.08
Serine	Amino acids	Amino acids, neutral	1.3	1.53	1.33	1.32	1.26	1.28	1.22	1.23	1.19	1.19	1.22	1.44
Glycerol-3-phosphate, polar fraction	Complex lipids, fatty acids and related	Lipid precursors	0.86	1.31	1.03	0.96	1.21	1.4	0.92	1.21	1.14	1.26	1.07	1.6
Valine	Amino acids	Amino acids, branched chain	0.97	0.99	1.19	1.14	1.02	1.09	0.89	0.99	0.85	1.13	1.09	1.04
Aspartate	Amino acids	Amino acids, acidic	1.05	1.21	1.27	0.95	1.27	1.2	1.06	1	1	0.86	1.16	1.31
Isoleucine	Amino acids	Amino acids, branched chain	1.04	1.02	1.27	1.12	1.03	1.08	0.91	1.05	0.88	1.06	1.05	1.11
Leucine	Amino acids	Amino acids, branched chain	1.04	0.99	1.26	1.13	1.02	1.09	0.9	0.97	0.89	1.02	1.07	1.05
Proline	Amino acids	Amino acids, neutral	1.31	1.31	1.42	1.18	1.22	1.26	1.21	1.22	1.28	1.14	1.27	1.29
Threonic acid	Vitamins, cofactors and related	Ascorbic acid and related	0.86	1.32	0.87	0.81	0.85	0.82	0.93	1.13	0.94	1.05	0.95	0.94
Lactate	Energy metabolism and related	Glycolysis/Gluconeogenesis	0.76	0.63	0.48	0.72	0.7	0.91	0.68	0.56	0.6	0.96	0.65	0.98
Glycolate	Miscellaneous	Miscellaneous	0.96	1.22	0.97	0.97	0.95	0.95	1.17	0.99	0.99	1.07	1.42	0.91
Asparagine	Amino acids	Amino acids, basic	1.18	1.26	1.36	1.12	0.94	0.91	0.95	1.36	1.02	1.09	1.15	1.18
Ascorbic acid (additional: Glucose)	Vitamins, cofactors and related	Ascorbic acid and related	0.98	0.94	0.78	1.09	0.83	1.03	1.07	0.77	0.95	1.03	0.87	1.18
Tyrosine	Amino acids	Amino acids, aromatic	0.9	0.81	0.78	1.02	1.02	1.03	0.8	0.74	0.87	1.1	1.12	1.03
Unknown polar (38000389)	Unknown	Unknown polar	0.72	0.98	0.67	0.82	0.7	1.04	1.19	1.09	0.88	0.86	0.75	1.05
3-Hydroxybutyrate	Energy metabolism and related	Ketone bodies	1.56	1.66	1.83	1.16	1.68	1.43	1.56	1.63	1.39	1.21	1.07	1.06
Ribal (additional: 2'-Deoxyadenosine, 2'-Deoxycytidine, 2'-Deoxyguanosine, 2'-Deoxythymidine, 2'-Deoxyuridine)	Carbohydrates and related	Nucleobase related saccharides	1.13	0.87	1.36	1.14	1.14	1.22	0.91	1.04	1.18	1.25	1.07	0.89
Unknown polar (38000433)	Unknown	Unknown polar	1.14	0.94	1.1	1.01	0.69	0.66	0.9	1.13	1.15	0.96	0.89	1.19
trans-4-Hydroxyproline	Amino acids related	Collagen metabolism	1.32	1.65	1.46	1.04	1.12	1.25	1.27	1.39	1.35	1.1	1.19	1.3
Cytosine (additional: 2'-Deoxycytidine)	Nucleobases and related	Pyrimidine metabolism	1.07	1.1	1.29	0.91	1.21	1.33	0.89	1.05	1.18	1.05	1.14	1.05
Unknown polar (38000449)	Unknown	Unknown polar	0.87	0.99	0.79	0.94	0.8	0.86	1.22	1.14	1.05	0.7	0.89	0.93
1,5-Anhydrosorbitol	Carbohydrates and related	Polyols	1.03	0.73	0.48	0.4	0.21	0.12	1.01	1.09	1.09	0.81	0.28	0.1
Histidine	Amino acids	Amino acids, basic	1.18	1.21	1.22	1.25	1.13	1.08	1.01	1.12	1.1	1.06	1.05	0.92
Uracil	Nucleobases and related	Pyrimidine metabolism	0.92	0.89	1.02	0.72	1.12	1.13	0.9	0.88	1.06	0.76	0.96	0.85
Xylitol	Carbohydrates and related	Polyols	1.57	0.92	1.21	1.11	1.2	1.71	1.28	1.15	1.04	1.88	1.14	1.57
3-Hydroxyindole (additional: 3-Indoxylsulfate)	Amino acids related	Tryptophan metabolism	2.34	1.91	0.74	1.32	1.96	0.83	0.86	1.33	1.09	1.22	1.28	1.31
Glucuronic acid	Carbohydrates and related	Sugar acids	1.09	1.16	1.13	1.09	0.84	0.94	0.99	1.14	1.24	1.29	0.89	1.16
Indole-3-acetic acid	Amino acids related	Tryptophan metabolism	0.48	0.42	0.54	0.78	0.53	0.47	0.83	0.85	0.84	1.11	0.73	0.98
Pseudouridine	Nucleobases and related	Pyrimidine metabolism	1.21	1.75	1.44	1.06	1.43	1.45	1	1.54	1.45	1.05	1.21	1.38
Uric acid	Nucleobases and related	Purine metabolism	0.68	0.86	0.7	0.7	0.93	0.76	0.54	0.9	0.81	0.69	0.77	0.76
scyllo-Inositol	Carbohydrates and related	Polyols	0.9	1.32	1.1	0.67	0.74	0.57	0.9	1.08	1.18	0.76	0.85	0.73
Erythronic acid	Carbohydrates and related	Sugar acids	1.22	1.69	1.46	0.9	1.35	1.37	1	1.06	1.43	0.82	1.15	1.24
Allantoin	Nucleobases and related	Purine metabolism	1.21	1.47	1.52	1.14	1.3	1.24	0.93	1.15	1.31	1.2	1.38	1.32
3-Hydroxyisobutyrate	Amino acids related	Amino acid metabolites	NA	NA	NA	NA	NA	NA	NA	NA	NA	NA	NA	NA
Cystine	Amino acids	Amino acids, S-containing	0.77	0.63	0.46	1.02	1.11	1.05	1.04	0.58	0.94	1.06	0.86	0.85
3-Phosphoglycerate (3-PGA)	Energy metabolism and related	Glycolysis/Gluconeogenesis	0.7	1.13	0.74	0.68	0.76	1.01	0.72	0.98	0.99	0.87	0.71	1.27
2-Hydroxybutyrate	Energy metabolism and related	Energy metabolism, miscellaneous	2.03	1.36	1.42	1.16	1.2	1.28	1.78	1.73	1.37	1.19	1.16	0.93
Ketoleucine	Amino acids related	Amino acid metabolites	0.7	0.64	0.61	0.69	0.7	0.68	0.75	0.65	0.67	0.65	0.63	0.65
Mannosamine	Carbohydrates and related	Aminosugars	0.85	0.73	0.63	1.08	0.92	1.14	0.87	0.92	0.81	1.31	1.02	1.11
Glucosamine	Carbohydrates and related	Aminosugars	0.76	0.73	0.58	1.17	1.02	1.03	0.73	0.78	0.79	1.37	0.99	1.07
Indole-3-lactic acid	Amino acids related	Tryptophan metabolism	0.65	0.58	0.64	0.98	0.69	0.71	0.86	0.86	0.77	0.8	0.84	0.73
Unknown polar (58000010)	Unknown	Unknown polar	0.93	0.85	0.72	0.9	1.07	1.41	0.81	1.04	0.94	0.92	1.17	0.88
Unknown polar (58000014)	Unknown	Unknown polar	1.12	0.75	1.18	1.18	0.79	1.17	1.87	0.8	1.56	0.98	0.93	1.1
Unknown polar (58000017)	Unknown	Unknown polar	0.91	1.32	1.49	1	1.91	1.02	1.03	0.85	0.84	0.93	1.04	2.09
Unknown polar (58000018)	Unknown	Unknown polar	1	0.99	0.98	0.96	0.89	0.99	0.84	1.03	1.03	0.94	0.97	1.04
Hippuric acid	Miscellaneous	Miscellaneous	0.77	1.14	0.55	0.42	0.63	0.5	0.88	0.66	0.45	0.2	0.5	0.97
3-Indoxylsulfate	Amino acids related	Tryptophan metabolism	1.43	1.43	0.74	1.26	1.5	0.63	0.65	1.01	1.14	1.37	1.34	1.34
Succinate	Energy metabolism and related	Citrate cycle	1.04	1.03	0.99	0.96	0.94	0.97	0.98	0.93	1.08	0.97	1.06	1.07
Unknown polar (58000132)	Unknown	Unknown polar	1.02	0.99	0.92	1	1.26	0.96	0.88	1.08	1.11	0.93	1.16	1.1
Unknown polar (58000133)	Unknown	Unknown polar	0.87	0.96	0.89	0.95	1.1	1.04	0.87	1	1.08	0.94	1.01	0.97
Unknown polar (58000140)	Unknown	Unknown polar	0.97	0.96	0.74	0.74	1.27	0.98	0.85	0.93	0.94	0.87	0.75	0.65
Unknown polar (58000141)	Unknown	Unknown polar	1.08	1.31	1.41	0.95	0.97	1.09	1.2	1.4	1.51	0.9	0.85	1.01
Unknown polar (58000142)	Unknown	Unknown polar	0.99	0.82	0.81	0.74	1.03	0.79	1.12	0.77	1.15	1.05	0.86	0.88
Unknown polar (58000143)	Unknown	Unknown polar	1.05	0.84	1.22	1.04	0.84	1.05	1.04	1.1	0.92	1.05	0.84	0.89
Unknown polar (58000144)	Unknown	Unknown polar	0.98	0.98	0.99	0.88	0.97	0.98	0.94	0.92	1.02	1.07	1.09	0.96
Unknown polar (58000145)	Unknown	Unknown polar	0.94	1.06	1.09	0.89	0.85	0.99	0.96	0.91	1	1.07	1.02	0.98
Unknown polar (58000146)	Unknown	Unknown polar	1.09	1.06	1.09	0.95	0.93	0.87	0.84	1.33	1.27	1.02	1.05	0.93
Unknown polar (58000147)	Unknown	Unknown polar	1.19	1.12	1.02	0.99	1.06	0.86	0.94	0.93	1.09	0.84	1.02	1.04
Unknown polar (58000148)	Unknown	Unknown polar	0.92	1.09	0.97	0.94	0.94	0.9	1.01	0.81	0.91	0.8	0.84	1.04
Unknown polar (58000149)	Unknown	Unknown polar	0.87	1.1	1.17	0.84	0.83	1.53	0.82	0.95	1.26	1.26	1.03	1.17
Unknown polar (58000152)	Unknown	Unknown polar	0.97	0.87	0.8	0.79	1.09	0.98	1.01	0.9	1.03	0.84	0.92	0.83
Unknown polar (58000153)	Unknown	Unknown polar	0.93	1.27	1.01	1.02	0.89	0.95	1	0.87	1.16	1.03	1.17	0.95
Unknown polar (58000154)	Unknown	Unknown polar	1.33	1.27	1.25	1.08	0.97	1.13	1.06	1.07	1.19	1.44	0.97	0.87
Unknown polar (58000155)	Unknown	Unknown polar	0.85	1.01	1.22	1.04	0.99	1.08	1.02	0.91	1.09	1.08	1.07	1.29
Unknown polar (58000156)	Unknown	Unknown polar	0.92	0.92	1.07	0.99	1.03	1.12	0.84	0.91	0.82	0.91	0.88	1.14
Unknown polar (58000157)	Unknown	Unknown polar	0.97	1.05	1.21	0.99	1.02	1.08	0.85	1.09	1.07	1.05	0.95	1.01
Unknown polar (58000158)	Unknown	Unknown polar	0.79	1.19	0.97	1.14	1.57	1.33	1.05	0.83	1.34	1.11	1.18	1.28
Unknown polar (58000159)	Unknown	Unknown polar	1.01	0.95	1.16	0.95	0.97	1.03	1.02	0.89	0.88	1.05	0.94	1.04
Unknown polar (58000160)	Unknown	Unknown polar	0.92	0.91	1.06	0.93	0.98	1.19	1.09	1	1.04	0.93	1.19	1.07
Unknown polar (58000161)	Unknown	Unknown polar	0.95	1.03	1	1.04	0.96	0.92	0.88	0.8	0.92	1.07	0.91	1.02
Unknown polar (58000162)	Unknown	Unknown polar	1.15	0.89	1.08	0.94	0.86	1.22	1.09	1.04	1.1	0.94	0.94	1.2
Unknown polar (58000164)	Unknown	Unknown polar	0.92	1.06	0.92	0.99	0.94	0.88	0.74	0.96	1.06	0.94	1.04	0.95
Unknown polar (58000165)	Unknown	Unknown polar	0.93	1.06	1.07	0.86	0.86	0.96	0.77	0.97	0.98	0.95	1.15	0.97
Unknown polar (58000166)	Unknown	Unknown polar	1.07	1.01	1.02	1.09	0.93	0.98	1.17	1.16	0.98	1.14	1.08	1.04
Unknown polar (58000167)	Unknown	Unknown polar	1.04	1.12	0.96	1.79	1.51	1.03	1.16	0.99	1.36	1.59	1.86	1.32
Unknown polar (58000168)	Unknown	Unknown polar	1.08	1.03	1.03	1.04	0.87	1	1.18	1.12	1.11	1.05	0.98	0.96
Unknown polar (58000169)	Unknown	Unknown polar	0.85	1.03	1.07	0.81	0.91	1.29	1.07	0.95	0.9	1.08	0.94	1.12
Unknown polar (58000170)	Unknown	Unknown polar	1.15	0.91	0.82	1.03	1.08	0.95	1.07	1.02	1.18	1.06	1.07	1.07
Unknown polar (58000171)	Unknown	Unknown polar	1.04	1.08	1.12	0.92	0.92	0.95	0.88	1.11	1.02	0.69	0.93	1.04
Unknown polar (58000172)	Unknown	Unknown polar	0.95	1.03	1.12	1.11	0.96	1.05	0.85	1.03	0.89	1	0.91	1.11
Lysophosphatidylcholine (C18:2)	Complex lipids, fatty acids and related	Lysophosphatidylcholines	1.1	1.05	0.86	1.15	1.11	1.08	1.01	1.17	1.3	1.3	1.1	1.27
Lysophosphatidylethanolamine (C22:5)	Complex lipids, fatty acids and related	Lysophosphatidylethanolamines	1.25	1.36	1.11	1.19	1.08	1.19	1.43	1.2	1.39	1.26	1.24	1.11
Lysophosphatidylcholine (C16:0)	Complex lipids, fatty acids and related	Lysophosphatidylcholines	0.98	1	1.04	0.91	0.91	1	1.2	0.99	0.91	0.99	0.87	0.87
Lysophosphatidylcholine (C18:1)	Complex lipids, fatty acids and related	Lysophosphatidylcholines	1.14	1.21	1	1.01	1.07	1.19	1.12	1.15	1.29	1.09	1.27	1.22
Lysophosphatidylcholine (C18:0)	Complex lipids, fatty acids and related	Lysophosphatidylcholines	0.98	0.93	0.96	0.97	1.03	0.98	1.02	0.98	0.97	0.95	1.02	1.09
Sphingomyelin (d18:2,C16:0)	Complex lipids, fatty acids and related	Sphingomyelins	0.92	0.82	1.07	0.87	1.02	1.03	1.37	0.94	1.11	1.41	0.82	0.87
Sphingomyelin (d18:2,C18:0)	Complex lipids, fatty acids and related	Sphingomyelins	0.76	0.84	0.81	0.97	0.74	0.8	1.07	1.25	1.12	0.78	0.71	0.71
Phosphatidylcholine (C16:1,C18:2)	Complex lipids, fatty acids and related	Phosphatidylcholines	1.17	1.48	1.06	1.33	1.08	1.07	1.25	1.23	1.18	1.11	1.16	1.13
Phosphatidylcholine (C16:0,C22:6) (additional: Phosphatidylcholine (C18:2,C20:4))	Complex lipids, fatty acids and related	Phosphatidylcholines	1.49	1.75	1.5	1.48	1.6	1.47	1.39	1.39	1.29	1.3	1.42	1.32
Phosphatidylcholine No 02	Complex lipids, fatty acids and related	Phosphatidylcholines	1.63	1.69	1.62	1.2	1.3	0.95	1.32	1.34	1.29	1.08	1.26	1.25
Phosphatidylcholine (C16:0,C18:2)	Complex lipids, fatty acids and related	Phosphatidylcholines	1.15	1.11	1.19	1.11	1.08	1.15	1	1.12	1.18	1.05	1.12	1.1
Phosphatidylcholine (C18:1,C18:2) (additional: Phosphatidylcholine (C16:0,C20:3))	Complex lipids, fatty acids and related	Phosphatidylcholines	1.14	1.26	1.31	1.21	1.2	1.12	1.06	1.15	1.21	1.14	1.18	1.24
Unknown lipid (68000015)	Unknown	Unknown lipid	1.22	1.1	1.1	1.12	1	1.1	1.07	0.98	0.96	1.08	0.99	1.08
Phosphatidylcholine (C16:0,C16:0)	Complex lipids, fatty acids and related	Phosphatidylcholines	1.24	1.37	1.41	1.09	1.07	1.22	1.09	1.22	1.09	1	1.11	1.18
Unknown lipid (68000017)	Unknown	Unknown lipid	0.88	1.13	1.45	1.01	1.13	1.07	0.99	1.03	1.08	0.93	1.06	1.28
Choline plasmalogen (C18,C20:4)	Complex lipids, fatty acids and related	Plasmalogens	1.35	1.48	1.51	1.1	1.28	1.27	1.07	1.15	0.99	0.89	1.2	1.28
Phosphatidylcholine (C18:0,C20:4)	Complex lipids, fatty acids and related	Phosphatidylcholines	1.07	1.02	0.99	1.07	1.05	1	1.04	1.02	1.02	1.03	1.01	0.99
Unknown lipid (68000020)	Unknown	Unknown lipid	0.94	1.08	1.39	1.14	1.03	0.96	0.97	1.03	1.24	1	1.07	0.94
Sphingomyelin (d18:1,C23:0)	Complex lipids, fatty acids and related	Sphingomyelins	0.94	0.88	0.71	1.12	0.99	0.89	0.88	0.86	0.87	0.79	0.82	1
DAG (C18:1,C18:2)	Complex lipids, fatty acids and related	Diacylglycerols	2.43	2.02	2.19	1.78	1.86	1.79	1.62	1.77	2.02	1.63	1.75	1.3
Ceramide (d18:1,C24:0)	Complex lipids, fatty acids and related	Ceramides	1.03	0.96	1.02	1.17	1.12	0.91	1.01	0.95	1.02	1.03	1.05	1.18
Unknown lipid (68000028)	Unknown	Unknown lipid	3.04	3.26	1.91	2.06	1.58	1.81	2.09	3.6	1.91	2.37	1.74	1.33
TAG (C18:2,C18:2)	Complex lipids, fatty acids and related	Triacylglycerols	7.24	9.41	7.17	2.55	2.38	2.07	6.02	7.17	4.89	2.76	2.36	1.79
TAG (C16:0,C18:2)	Complex lipids, fatty acids and related	Triacylglycerols	7.17	9.51	6.63	1.83	1.46	1.36	5.22	6.54	5.33	1.67	1.34	1.31
TAG (C18:1,C18:2)	Complex lipids, fatty acids and related	Triacylglycerols	8.43	11.04	5.64	2.36	1.59	1.67	6.77	8.31	5.59	2.76	1.9	1.67
Unknown lipid (68000033)	Unknown	Unknown lipid	1.06	1.06	0.9	0.75	0.96	1.09	1.09	0.99	1.05	0.83	0.79	0.92
Unknown lipid (68000034)	Unknown	Unknown lipid	1.22	1.03	0.96	0.94	1.13	0.93	1.24	1.05	1.06	0.98	0.91	0.79
Unknown lipid (68000035)	Unknown	Unknown lipid	1.18	1.19	1.23	1.3	1.13	1.41	1.13	1.35	1.09	1.41	1.31	1.15
Lysophosphatidylcholine (C17:0)	Complex lipids, fatty acids and related	Lysophosphatidylcholines	0.81	1.02	0.94	0.9	1.01	1	1.04	1.04	1.2	1.06	1.05	1.11
Unknown lipid (68000038)	Unknown	Unknown lipid	0.79	0.85	1	0.74	0.9	1.05	1.07	0.99	1.15	1.06	1.06	1.14
Lysophosphatidylcholine (C20:4)	Complex lipids, fatty acids and related	Lysophosphatidylcholines	1.06	1.05	1.04	1.03	1.02	1.04	1.07	1.05	1.07	1.03	1.02	1.02
TAG (C16:0,C16:1)	Complex lipids, fatty acids and related	Triacylglycerols	3.64	3.81	2.65	1.39	1.33	0.83	3.15	3.87	2.93	1.38	1.34	0.98
TAG (C18:2,C18:3)	Complex lipids, fatty acids and related	Triacylglycerols	7.98	6.01	3.32	2.94	2.11	2.06	5.71	5.8	4.41	3.66	1.87	1.9
Unknown lipid (68000045)	Unknown	Unknown lipid	0.48	0.37	0.45	0.36	0.5	0.39	0.5	0.57	0.54	0.35	0.38	0.49
Sphingomyelin (d18:1,C16:0)	Complex lipids, fatty acids and related	Sphingomyelins	1.09	0.95	1	0.98	1.02	0.79	1.17	1	1.21	0.94	0.9	1.02
Unknown lipid (68000047)	Unknown	Unknown lipid	1.15	0.94	1.15	1.15	1.18	1.12	0.97	1	0.95	0.82	1.25	1.09
Phosphatidylcholine (C16:0,C20:5)	Complex lipids, fatty acids and related	Phosphatidylcholines	0.94	1.2	1.17	1.03	1.04	1.11	1.01	1.04	0.98	1.03	1.09	1.09
Phosphatidylcholine (C16:0,C20:4) (additional: Phosphatidylcholine (C18:2,C18:2))	Complex lipids, fatty acids and related	Phosphatidylcholines	1.14	1.25	1.21	1.08	1.04	1	1.03	1.12	1.11	1.05	1.04	1.01
Phosphatidylcholine (C18:0,C18:2)	Complex lipids, fatty acids and related	Phosphatidylcholines	1.1	1.08	1.26	1.15	1.1	1.23	1.1	1.06	1.15	1.01	1.12	1.18
Phosphatidylcholine (C18:0,C18:1)	Complex lipids, fatty acids and related	Phosphatidylcholines	1.07	1.12	1.05	1.22	1.18	1.25	1.1	1.05	1.22	1.19	1.23	1.36
Unknown lipid (68000052)	Unknown	Unknown lipid	1.11	1	1.07	1.08	1.07	0.98	1	0.93	0.99	1.01	0.98	0.98
Phosphatidylcholine (C18:0,C20:3) (additional: Phosphatidylcholine (C20:1,C18:2), Phosphatidylcholine (C20:2,C18:1))	Complex lipids, fatty acids and related	Phosphatidylcholines	1.08	1.01	1.1	1.14	1.06	1.02	1.07	1.09	1.01	1.02	0.98	0.99
Sphingomyelin (d18:1,C24:0)	Complex lipids, fatty acids and related	Sphingomyelins	1.09	1.05	1.08	0.99	0.99	1.2	0.9	0.96	1.01	0.93	1.05	1.17
Phosphatidylcholine (C18:0,C22:6)	Complex lipids, fatty acids and related	Phosphatidylcholines	1.22	1.29	1.29	1.14	1.27	1.33	1.29	1.37	1.3	1.03	1.05	1.09
Unknown lipid (68000056)	Unknown	Unknown lipid	6.07	7.26	3.71	2.75	1.86	1.97	5.39	5.37	5.37	3.01	1.71	1.94
TAG (C16:0,C18:1,C18:3) (additional: TAG (C16:0,C18:2,C18:2), TAG (C16:1,C18:1,C18:2))	Complex lipids, fatty acids and related	Triacylglycerols	11.7	14.83	7.05	2.89	2.1	2.29	10.77	10.83	6.55	2.94	1.93	1.67
TAG (C18:1,C18:2,C18:3) (additional: TAG (C16:0,C18:1,C20:5), TAG (C16:0,C18:2,C20:4))	Unknown	Unknown lipid	6.04	7.85	4.89	2.99	2.04	2.28	4.94	5.15	3.63	2.96	2.13	1.89
Unknown lipid (68000059)	Unknown	Unknown lipid	6.04	7.61	5.2	2.26	1.81	2.3	3.25	3.77	3.63	2.24	2.17	1.61
Unknown lipid (68000060)	Unknown	Unknown lipid	1.12	1.33	1.43	0.96	1.12	1.48	1.32	1.32	1.48	1.16	1.17	1.48
Homovanillic acid (HVA)	Hormones, signal substances and related	Catecholamine catabolites	NA	NA	NA	NA	NA	NA	NA	NA	NA	NA	NA	NA
3,4-Dihydroxyphenylacetic acid (DOPAC)	Hormones, signal substances and related	Catecholamine catabolites	NA	NA	NA	NA	NA	NA	NA	NA	NA	NA	NA	NA
3,4-Dihydroxyphenylglycol (DOPEG)	Hormones, signal substances and related	Catecholamine catabolites	NA	NA	NA	NA	NA	NA	NA	NA	NA	NA	NA	NA
Serotonin (5-HT)	Hormones, signal substances and related	Serotonin and serotonin metabolism	NA	NA	NA	NA	NA	NA	NA	NA	NA	NA	NA	NA
Normetanephrine	Hormones, signal substances and related	Catecholamine catabolites	NA	NA	NA	NA	NA	NA	NA	NA	NA	NA	NA	NA
Metanephrine	Hormones, signal substances and related	Catecholamine catabolites	NA	NA	NA	NA	NA	NA	NA	NA	NA	NA	NA	NA
Dopamine	Hormones, signal substances and related	Catecholamines	NA	NA	NA	NA	NA	NA	NA	NA	NA	NA	NA	NA
Noradrenaline (Norepinephrine)	Hormones, signal substances and related	Catecholamines	NA	NA	NA	NA	NA	NA	NA	NA	NA	NA	NA	NA
Adrenaline (Epinephrine)	Hormones, signal substances and related	Catecholamines	NA	NA	NA	NA	NA	NA	NA	NA	NA	NA	NA	NA
3,4-Dihydroxyphenylalanine (DOPA)	Hormones, signal substances and related	Catecholamine precursors	NA	NA	NA	NA	NA	NA	NA	NA	NA	NA	NA	NA
3-Methoxytyrosine	Hormones, signal substances and related	Catecholamine catabolites	NA	NA	NA	NA	NA	NA	NA	NA	NA	NA	NA	NA
4-Hydroxy-3-methoxyphenylglycol (HMPG)	Hormones, signal substances and related	Catecholamine catabolites	NA	NA	NA	NA	NA	NA	NA	NA	NA	NA	NA	NA
Histamine	Hormones, signal substances and related	Other hormones, signal substances and related	NA	NA	NA	NA	NA	NA	NA	NA	NA	NA	NA	NA
Androstenedione	Hormones, signal substances and related	Steroids and related	NA	NA	NA	NA	NA	NA	NA	NA	NA	NA	NA	NA
Testosterone	Hormones, signal substances and related	Steroids and related	NA	NA	NA	NA	NA	NA	NA	NA	NA	NA	NA	NA
Progesterone	Hormones, signal substances and related	Steroids and related	NA	NA	NA	NA	NA	NA	NA	NA	NA	NA	NA	NA
21-Hydroxyprogesterone (11-Deoxycorticosterone)	Hormones, signal substances and related	Steroids and related	NA	NA	NA	NA	NA	NA	NA	NA	NA	NA	NA	NA
18-Hydroxy-11-deoxycorticosterone	Hormones, signal substances and related	Steroids and related	NA	NA	NA	NA	NA	NA	NA	NA	NA	NA	NA	NA
Corticosterone	Hormones, signal substances and related	Steroids and related	NA	NA	NA	NA	NA	NA	NA	NA	NA	NA	NA	NA

## Sheet: Doxorubicin
Profile name:	Doxorubicin
pValue:	0.05
			Adriamycin hydrochloride (MOA62) HD	Adriamycin hydrochloride (MOA62) HD	Adriamycin hydrochloride (MOA62) HD	Adriamycin hydrochloride (MOA62) HD	Adriamycin hydrochloride (MOA62) HD	Adriamycin hydrochloride (MOA62) HD	Adriamycin hydrochloride (MOA62) LD	Adriamycin hydrochloride (MOA62) LD	Adriamycin hydrochloride (MOA62) LD	Adriamycin hydrochloride (MOA62) LD	Adriamycin hydrochloride (MOA62) LD	Adriamycin hydrochloride (MOA62) LD
Metabolite Name	Class	Subclass	f7	f14	f28	m7	m14	m28	f7	f14	f28	m7	m14	m28
Threonine	Amino acids	Amino acids, neutral	0.97	0.95	1.07	0.88	1.07	1.16	1.08	0.85	0.99	0.92	0.98	0.99
Tryptophan	Amino acids	Amino acids, aromatic	0.83	0.87	0.85	0.9	0.75	0.81	0.91	0.95	1.05	0.88	1.01	0.98
Arginine	Amino acids	Amino acids, basic	1.01	0.95	1.2	1.09	1.15	1.16	0.93	1.1	1.15	0.99	0.96	1.01
Citrulline	Amino acids related	Urea cycle and related	0.82	0.79	0.8	0.7	0.91	0.8	0.94	0.96	0.94	0.92	0.89	0.82
Glutamate	Amino acids	Amino acids, acidic	1.1	1.07	0.79	0.84	1.11	0.89	0.94	1.05	0.99	0.87	0.86	0.84
Phenylalanine	Amino acids	Amino acids, aromatic	0.95	1.04	1.11	0.92	0.97	1.15	0.92	0.96	1.03	0.99	0.91	1
alpha-Tocopherol	Vitamins, cofactors and related	Tocopherols and related	1.09	1.16	1.12	1.23	1.21	1.63	1.07	1.04	1.03	0.98	1.04	0.9
Pantothenic acid	Vitamins, cofactors and related	Acyl-carriers and related	0.95	1.15	1.22	0.89	1.01	1.07	1.33	1.15	1.15	0.9	1.08	1.51
Taurine	Amino acids	Amino acids, S-containing	1.24	1.26	1.24	1.09	0.99	1.39	1.07	1.04	1.25	1.1	1.08	1.51
Malate	Energy metabolism and related	Citrate cycle	0.55	0.67	0.93	0.67	0.98	1.49	0.46	0.79	0.72	0.86	0.86	0.83
Fructose-6-phosphate (additional: Glucose-6-phosphate, myo-Inositol-1-phosphate, myo-Inositol-2-phosphate, myo-Inositol-4-phosphate)	Energy metabolism and related	Glycolysis/Gluconeogenesis	0.93	0.96	0.99	0.91	1.04	1.25	0.75	0.89	1.36	0.89	0.98	1.28
Salicylic acid	Miscellaneous	Miscellaneous	1.15	1.46	0.58	1.02	0.7	0.96	1.37	0.92	1.76	1.25	0.95	0.99
Coenzyme Q9	Vitamins, cofactors and related	Redox-carrier and related	1.98	1.71	2.3	1.69	2.68	2.73	1.3	1.52	1.37	0.94	1.06	0.9
Cholic acid	Complex lipids, fatty acids and related	Bile acids	65.02	78.65	21.22	7.18	66.06	6.61	0.25	17.5	3.14	0.51	1.1	0.16
Creatinine	Amino acids related	Creatine metabolism	0.77	0.95	0.92	0.78	0.76	0.89	0.79	0.87	0.87	0.84	1.02	0.92
Creatine	Amino acids related	Creatine metabolism	1.02	1.1	1.23	0.78	1.06	1.09	1.04	1.08	0.89	0.77	0.88	1.13
Kynurenic acid	Amino acids related	Tryptophan metabolism	0.88	0.91	1.03	0.8	0.68	0.72	0.73	0.75	1.04	0.71	0.89	0.89
Taurocholic acid	Complex lipids, fatty acids and related	Bile acids	NA	NA	NA	NA	NA	0.5	NA	NA	NA	NA	NA	NA
Glycochenodeoxycholic acid (additional: Glycodeoxycholic acid)	Complex lipids, fatty acids and related	Bile acids	NA	NA	NA	NA	NA	0.93	NA	NA	NA	NA	NA	NA
Glycerol, lipid fraction	Complex lipids, fatty acids and related	Fatty alcohols	1.34	1.09	1.06	1.28	1.25	2.1	1.17	1.16	1.21	1.05	1.02	1.07
Palmitic acid (C16:0)	Complex lipids, fatty acids and related	Fatty acids, saturated	1.11	1.1	0.94	1.19	1.48	1.54	1.05	0.96	0.88	1.04	1.07	0.95
Linoleic acid (C18:cis[9,12]2)	Complex lipids, fatty acids and related	Fatty acids, poly-unsaturated	1.06	1.08	1.12	1.23	1.41	1.57	1.03	1.01	1.01	1.13	1.1	0.91
Oleic acid (C18:cis[9]1)	Complex lipids, fatty acids and related	Fatty acids, mono-unsaturated	1.04	1	0.97	0.94	1.08	1.24	1.04	0.95	0.92	0.95	0.98	0.9
Stearic acid (C18:0)	Complex lipids, fatty acids and related	Fatty acids, saturated	1.08	1.02	0.86	1.23	1.41	1.7	1.03	0.93	0.87	0.96	0.95	0.94
Arachidonic acid (C20:cis[5,8,11,14]4)	Complex lipids, fatty acids and related	Fatty acids, poly-unsaturated	1.12	1.05	0.95	1.3	1.45	1.73	1.04	0.91	0.84	0.99	1.07	1
Docosahexaenoic acid (C22:cis[4,7,10,13,16,19]6)	Complex lipids, fatty acids and related	Fatty acids, poly-unsaturated	1.27	1.34	1.41	1.79	2.1	3.08	1.05	1.09	1.14	1.25	0.94	1.04
Cholesterol, total	Complex lipids, fatty acids and related	Cholesterol and related	1.1	1.08	0.96	1.33	1.52	1.63	0.97	0.99	0.86	1.03	1.18	0.97
beta-Sitosterol	Miscellaneous	Diet related	0.96	0.85	0.62	1.25	1.35	1.48	0.99	1.24	0.87	1.09	1	1
Glycerol phosphate, lipid fraction	Complex lipids, fatty acids and related	Phospholipid metabolites	1.1	1.01	1.21	1.3	1.67	2.02	0.9	0.93	0.93	0.82	1.08	0.99
Galactose, lipid fraction	Complex lipids, fatty acids and related	Glycolipids	1.11	0.91	0.83	1.27	1.44	1.66	0.96	0.94	0.81	0.93	1.09	1.13
Lignoceric acid (C24:0)	Complex lipids, fatty acids and related	Fatty acids, saturated	1.15	0.99	1.01	1.38	1.56	2.04	1.07	1.09	0.92	0.92	1.02	1.14
Campesterol	Miscellaneous	Diet related	1.12	0.95	0.66	1.31	1.61	1.84	1.07	1.09	0.93	0.88	1.08	0.84
Hexadecanol	Complex lipids, fatty acids and related	Fatty alcohols	1.14	0.96	0.87	1.32	1.28	1.06	1.07	1.15	0.86	1.28	0.99	0.93
Heneicosanoic acid (C21:0) (additional: Behenic acid (C22:0))	Complex lipids, fatty acids and related	Fatty acids, saturated	0.99	1.33	0.94	1.08	1.05	1.59	1.15	1.13	1.03	0.92	0.97	1.14
Dodecanol	Complex lipids, fatty acids and related	Fatty alcohols	1.36	0.99	0.89	1.27	1.41	1.39	1.02	0.97	0.93	0.81	1.24	0.95
Heptadecanoic acid (C17:0)	Complex lipids, fatty acids and related	Fatty acids, saturated	0.98	1.02	0.94	1.09	1.3	1.58	0.98	0.99	0.89	0.99	1.08	1.1
Eicosanoic acid (C20:0)	Complex lipids, fatty acids and related	Fatty acids, saturated	0.91	1.04	1.6	1.31	1.26	1.51	1.2	0.77	1.21	1.19	1.07	0.84
Tricosanoic acid (C23:0)	Complex lipids, fatty acids and related	Fatty acids, saturated	1.45	0.85	0.9	1.36	1.55	2.14	0.93	0.93	0.95	1.03	0.84	0.98
Phosphate, lipid fraction	Complex lipids, fatty acids and related	Phospholipid metabolites	1.09	1.06	0.96	1.12	1.29	1.51	0.97	0.94	0.9	1.16	1.04	0.93
Myristic acid (C14:0)	Complex lipids, fatty acids and related	Fatty acids, saturated	0.94	0.58	0.95	0.96	1.27	1.32	0.92	0.78	0.84	1.03	1.05	0.75
myo-Inositol-2-phosphate, lipid fraction (myo-Inositolphospholipids)	Complex lipids, fatty acids and related	Phospholipid metabolites	0.72	1.06	0.91	1.89	1.68	2.09	0.79	0.86	0.88	0.66	1.18	1.07
Behenic acid (C22:0)	Complex lipids, fatty acids and related	Fatty acids, saturated	1.35	1.06	1.1	1.72	1.41	2.04	1.09	1.09	1.05	1.05	0.98	0.94
4-Hydroxysphinganine (t18:0, Phytosphingosine), total	Complex lipids, fatty acids and related	Sphingolipids	1.23	0.97	1.01	1.54	1.52	2.61	1.19	1.15	0.97	1.12	1.13	0.99
Nervonic acid (C24:cis[15]1)	Complex lipids, fatty acids and related	Fatty acids, mono-unsaturated	1.01	1.03	1.14	1.68	1.49	2.06	1.13	1.03	0.93	1	1.18	0.98
Urea	Amino acids related	Urea cycle and related	0.94	0.92	0.9	0.77	1.03	0.9	0.75	1.03	0.92	0.88	0.89	0.98
Isopalmitic acid (C16:0)	Complex lipids, fatty acids and related	Fatty acids, saturated	0.75	1.08	0.83	0.92	1.06	1.2	0.84	1.09	0.93	0.9	1.01	1.03
Palmitoleic acid (C16:cis[9]1)	Complex lipids, fatty acids and related	Fatty acids, mono-unsaturated	0.86	0.81	0.87	0.79	1.2	0.97	0.93	0.75	0.92	0.93	0.87	0.68
Unknown lipid (28000473)	Unknown	Unknown lipid	1.41	1.09	1.02	1.15	1.3	1.28	1.13	0.95	1.27	0.77	1.01	0.75
14-Methylhexadecanoic acid	Complex lipids, fatty acids and related	Fatty acids, branched	1.03	1	0.75	0.85	1.04	0.98	0.99	0.82	0.93	0.97	1.03	0.91
gamma-Linolenic acid (C18:cis[6,9,12]3)	Complex lipids, fatty acids and related	Fatty acids, poly-unsaturated	1.02	0.94	0.63	1.55	2.07	2.61	1.1	0.92	0.85	1.12	0.87	0.92
16-Methylheptadecanoic acid	Complex lipids, fatty acids and related	Fatty acids, branched	0.7	0.94	0.76	1.24	1.28	1.1	0.84	0.8	0.71	0.98	0.85	0.83
17-Methyloctadecanoic acid	Complex lipids, fatty acids and related	Fatty acids, branched	0.84	0.74	0.78	1.27	1.2	1.36	0.76	0.73	0.83	1.06	1.17	1.17
dihomo-gamma-Linolenic acid (C20:cis[8,11,14]3)	Complex lipids, fatty acids and related	Fatty acids, poly-unsaturated	1.44	1.11	0.97	1.7	1.82	3.03	1.24	1.11	1.15	0.95	1.04	1.15
Eicosaenoic acid (C20:1) No 02	Complex lipids, fatty acids and related	Fatty acids, mono-unsaturated	1.19	1.55	1.05	1.13	1.36	1.23	0.82	1.3	1.17	0.77	1.29	0.88
3-O-Methylsphingosine (d18:1) (additional: Sphingolipids, erythro-Sphingosine (d18:1), threo-Sphingosine (d18:1))	Complex lipids, fatty acids and related	Sphingolipids	1.44	1.05	1.13	1.94	2.16	2.6	1.24	1.15	0.87	0.96	1.21	0.8
threo-Sphingosine (d18:1) (additional: Sphingolipids)	Complex lipids, fatty acids and related	Sphingolipids	1.45	0.94	1.15	1.91	1.96	2.28	1.21	1.19	0.95	1.05	1.23	0.93
Docosapentaenoic acid (C22:cis[7,10,13,16,19]5)	Complex lipids, fatty acids and related	Fatty acids, poly-unsaturated	1.46	1.07	1.04	1.79	2.21	3.4	1.38	0.98	1.09	1.13	1.38	1.15
5-O-Methylsphingosine (d18:1) (additional: Sphingolipids, erythro-Sphingosine (d18:1), threo-Sphingosine (d18:1))	Complex lipids, fatty acids and related	Sphingolipids	1.54	0.98	1.19	1.86	2.09	2.7	1.16	1.14	0.94	0.93	1.19	1.01
erythro-Sphingosine (d18:1) (additional: Sphingolipids)	Complex lipids, fatty acids and related	Sphingolipids	1.43	1	1.19	1.79	1.92	2.3	1.23	1.13	0.99	1.02	1.18	0.99
Elaidic acid (C18:trans[9]1)	Complex lipids, fatty acids and related	Fatty acids, mono-unsaturated	0.99	1.12	0.95	1.13	1.12	1.38	0.9	0.95	0.96	1.01	1.09	1.05
myo-Inositol, lipid fraction	Complex lipids, fatty acids and related	Glycolipids	1.12	1.02	0.77	1.31	1.36	1.53	1.07	0.93	0.83	0.97	1.07	0.93
Pyruvate (additional: Phosphoenolpyruvate (PEP))	Energy metabolism and related	Glycolysis/Gluconeogenesis	0.75	0.92	0.97	0.73	1.52	1.76	0.56	0.93	0.84	0.6	1.13	1.59
Alanine	Amino acids	Amino acids, neutral	0.76	0.83	1.13	0.87	1	0.96	0.78	0.89	0.9	0.84	0.85	0.83
Glycine	Amino acids	Amino acids, neutral	0.91	0.89	0.94	0.83	0.8	0.73	0.96	1.04	1	0.99	0.96	1.02
Methionine	Amino acids	Amino acids, S-containing	0.92	0.99	1.1	0.97	1.12	1.18	0.99	0.96	0.97	0.94	0.96	1
5-Oxoproline (additional: Folic acid, Glutamate, Glutamine)	Amino acids related	Amino acid metabolites	1	1.1	1.13	0.94	0.96	0.97	1.05	1.03	1.08	0.89	0.92	1.16
Cysteine (additional: Cystine)	Amino acids	Amino acids, S-containing	0.74	0.72	0.98	0.66	0.82	1.12	0.94	1.03	0.89	0.93	0.9	0.87
Citrate	Energy metabolism and related	Citrate cycle	0.86	0.93	0.8	0.9	1.05	0.86	0.96	0.96	0.84	0.91	1.04	0.8
Lysine	Amino acids	Amino acids, basic	0.92	1.07	1.11	0.91	0.92	0.97	0.87	1.13	0.99	0.93	0.85	0.95
myo-Inositol	Carbohydrates and related	Polyols	0.88	0.97	0.82	0.86	0.93	0.86	0.91	1.04	1.04	0.94	0.88	0.8
Sucrose	Carbohydrates and related	Disaccharides	1.9	1.36	0.92	1.12	0.9	1.44	1.56	0.75	1.13	1.45	0.99	1.17
Mannose	Carbohydrates and related	Monosaccharides	1.35	1.31	1.36	1.16	1.29	1.56	0.98	1.07	1.16	1.06	0.97	1.14
Glucose (additional: Galactose, Gluconic acid, Mannitol)	Carbohydrates and related	Monosaccharides	1.17	1.1	1.15	0.92	1.13	1.19	0.95	1.01	1	0.88	0.94	0.73
Glycerol, polar fraction	Complex lipids, fatty acids and related	Lipid precursors	0.86	0.68	0.8	1	1.12	0.8	0.86	0.82	0.72	1.03	0.93	0.86
Spermidine	Miscellaneous	Polyamines	0.78	1.34	0.99	0.92	1.17	0.85	0.55	0.89	0.72	0.85	0.81	0.66
Glutamine	Amino acids	Amino acids, basic	1.03	1.18	1.12	1.15	0.92	1.02	1.09	1.08	1.04	0.91	1.02	1.1
Ornithine (additional: Arginine, Citrulline)	Amino acids related	Urea cycle and related	0.97	0.96	1.13	0.89	0.94	1.2	0.98	1.09	1.07	0.9	0.97	1.2
Phosphate (inorganic and from organic phosphates)	Miscellaneous	Miscellaneous	1.14	1.08	1.41	1.1	1.03	1.16	1.08	1.09	1.44	0.98	0.97	1.31
Serine	Amino acids	Amino acids, neutral	0.89	0.87	1.03	0.89	0.94	0.96	1.03	1.06	0.98	0.95	0.94	0.98
Glycerol-3-phosphate, polar fraction	Complex lipids, fatty acids and related	Lipid precursors	0.88	1.13	1.12	0.88	0.89	1.12	0.76	0.94	1.34	0.97	0.9	1.01
Valine	Amino acids	Amino acids, branched chain	0.95	1.14	1.27	0.99	1.14	1.21	1.09	1.03	1.12	0.95	1	1.12
Aspartate	Amino acids	Amino acids, acidic	1.15	1.14	0.91	0.88	1.01	1.15	1.12	1.09	1.27	1.02	1.06	1.43
Isoleucine	Amino acids	Amino acids, branched chain	0.97	1.21	1.28	0.95	1.14	1.35	1.12	1	1.15	0.88	1	1.14
Leucine	Amino acids	Amino acids, branched chain	1	1.24	1.36	1	1.16	1.4	1.15	1.03	1.1	0.89	1.01	1.21
Proline	Amino acids	Amino acids, neutral	0.91	0.89	1.03	0.9	1	1.07	1.08	1	0.97	0.9	0.93	0.91
Threonic acid	Vitamins, cofactors and related	Ascorbic acid and related	0.76	1.21	0.99	0.65	0.72	0.9	0.79	0.97	1.14	0.63	0.71	0.82
Lactate	Energy metabolism and related	Glycolysis/Gluconeogenesis	0.67	0.79	0.76	0.86	0.98	1.45	0.54	0.89	0.79	0.85	1.01	0.92
Glycolate	Miscellaneous	Miscellaneous	1.1	1.05	0.99	1.04	0.98	0.98	1.04	1.03	0.94	1.3	1.04	0.92
Asparagine	Amino acids	Amino acids, basic	0.81	0.98	1.1	0.89	0.84	0.94	1.08	1.05	1.09	0.88	0.73	0.97
Ascorbic acid (additional: Glucose)	Vitamins, cofactors and related	Ascorbic acid and related	0.99	1.14	1.28	0.96	1.17	1.13	0.82	0.94	1.04	0.91	0.86	0.92
Tyrosine	Amino acids	Amino acids, aromatic	0.81	0.84	0.96	0.78	1.01	0.97	0.9	1	0.93	0.95	0.99	0.91
Unknown polar (38000389)	Unknown	Unknown polar	0.74	0.72	0.92	0.71	1.03	0.76	0.82	0.38	0.95	0.82	1.87	0.49
3-Hydroxybutyrate	Energy metabolism and related	Ketone bodies	0.9	0.88	0.64	0.83	0.82	0.71	0.99	1.06	0.85	1.25	1.15	0.99
Ribal (additional: 2'-Deoxyadenosine, 2'-Deoxycytidine, 2'-Deoxyguanosine, 2'-Deoxythymidine, 2'-Deoxyuridine)	Carbohydrates and related	Nucleobase related saccharides	1.51	1.6	2.11	1.5	1.31	1.61	1.21	0.94	1.19	1.04	1.14	1.3
Unknown polar (38000433)	Unknown	Unknown polar	0.95	1.23	1	1.13	1.01	0.94	1.09	1.15	1.02	1.2	0.84	1.24
trans-4-Hydroxyproline	Amino acids related	Collagen metabolism	0.69	0.76	0.78	0.81	0.78	0.84	0.96	1.04	0.97	0.93	0.95	0.97
Cytosine (additional: 2'-Deoxycytidine)	Nucleobases and related	Pyrimidine metabolism	1.77	1.71	2.05	1.39	1.27	1.69	1.13	0.95	1.35	1.21	1.12	1.23
Unknown polar (38000449)	Unknown	Unknown polar	0.8	0.54	0.85	0.68	0.78	0.85	0.94	0.29	0.68	0.73	1.66	0.49
1,5-Anhydrosorbitol	Carbohydrates and related	Polyols	1.07	1.03	1.04	1.22	1.22	1.25	1.33	1.26	1.11	1.23	1.18	1.12
Histidine	Amino acids	Amino acids, basic	0.94	1.04	1.29	1.04	0.95	1.08	1.08	0.99	1.13	1.09	0.84	1.04
Uracil	Nucleobases and related	Pyrimidine metabolism	1.1	1.13	1.44	1.06	1.02	1.21	0.85	0.93	1.06	1.08	0.89	1.24
Xylitol	Carbohydrates and related	Polyols	0.86	1.21	0.96	0.9	0.8	1.32	1.07	1.23	0.88	0.79	1.01	1.29
3-Hydroxyindole (additional: 3-Indoxylsulfate)	Amino acids related	Tryptophan metabolism	0.71	0.7	0.88	0.56	0.63	0.52	0.65	0.92	0.71	0.74	0.93	1.1
Glucuronic acid	Carbohydrates and related	Sugar acids	1.17	1	0.9	0.84	0.84	0.86	0.79	0.89	0.9	0.82	0.88	1.2
Indole-3-acetic acid	Amino acids related	Tryptophan metabolism	0.96	0.95	0.81	0.64	0.89	0.68	0.92	0.96	0.63	0.81	1.12	0.75
Pseudouridine	Nucleobases and related	Pyrimidine metabolism	0.75	0.76	0.8	0.74	0.85	0.81	0.84	1	0.88	0.84	0.91	0.95
Uric acid	Nucleobases and related	Purine metabolism	0.81	0.8	0.8	0.87	0.91	0.84	0.67	0.71	0.79	0.77	0.99	0.88
scyllo-Inositol	Carbohydrates and related	Polyols	1.14	1.05	0.82	0.79	1.01	0.87	0.87	0.89	0.91	1.18	0.87	0.88
Erythronic acid	Carbohydrates and related	Sugar acids	0.95	0.9	1.03	1.1	0.88	1.09	0.97	0.99	0.99	1.13	1.07	1.03
Allantoin	Nucleobases and related	Purine metabolism	0.83	1.09	1.04	1.06	1.1	0.84	0.89	0.93	0.92	0.91	0.83	0.78
3-Hydroxyisobutyrate	Amino acids related	Amino acid metabolites	NA	NA	NA	NA	NA	NA	NA	NA	NA	NA	NA	NA
Cystine	Amino acids	Amino acids, S-containing	0.8	0.67	1.01	0.92	0.89	1.57	0.89	0.73	0.79	1.09	0.83	0.8
3-Phosphoglycerate (3-PGA)	Energy metabolism and related	Glycolysis/Gluconeogenesis	1.26	1.11	1.37	1.04	1.55	0.91	1.71	1.23	1.45	1.14	1.65	2.09
2-Hydroxybutyrate	Energy metabolism and related	Energy metabolism, miscellaneous	0.9	0.72	0.57	0.95	0.89	0.8	1.06	0.91	0.79	1.16	1.11	0.97
Ketoleucine	Amino acids related	Amino acid metabolites	0.67	0.89	0.71	0.83	0.95	0.73	0.67	0.78	0.68	0.97	0.99	0.78
Mannosamine	Carbohydrates and related	Aminosugars	1.01	0.98	0.99	1.18	1.05	1.16	0.78	0.89	0.92	1.41	0.83	0.94
Glucosamine	Carbohydrates and related	Aminosugars	1.92	0.88	1.35	0.97	1.82	1.72	0.84	1.18	1.11	0.94	1.23	1.4
Indole-3-lactic acid	Amino acids related	Tryptophan metabolism	0.85	0.83	0.8	0.88	0.81	0.9	0.93	0.73	1.01	1.07	0.99	1.05
Unknown polar (58000010)	Unknown	Unknown polar	1.07	1.14	1.3	0.94	1.5	1.22	1.35	1.07	1.31	1.14	0.78	1.31
Unknown polar (58000014)	Unknown	Unknown polar	0.69	0.91	1.26	1.04	0.73	0.96	1.24	1.1	1.2	1.17	1.1	1.02
Unknown polar (58000017)	Unknown	Unknown polar	NA	NA	NA	0.88	1.05	1.22	NA	NA	NA	NA	0.85	1.17
Unknown polar (58000018)	Unknown	Unknown polar	1.06	1	0.87	1.08	0.86	0.92	1.18	0.85	0.92	1.01	0.96	1.04
Hippuric acid	Miscellaneous	Miscellaneous	0.53	0.37	0.69	0.75	0.64	0.22	0.44	0.64	0.53	1.46	0.95	0.85
3-Indoxylsulfate	Amino acids related	Tryptophan metabolism	1.02	1	0.33	0.59	0.68	0.48	0.86	0.59	0.91	0.81	1.24	1.15
Succinate	Energy metabolism and related	Citrate cycle	1.07	0.91	1	0.9	0.93	1.03	0.95	1.04	0.97	0.97	1.02	0.98
Unknown polar (58000132)	Unknown	Unknown polar	0.94	0.87	1.23	0.99	0.87	0.95	0.81	0.91	1	1.11	0.93	0.9
Unknown polar (58000133)	Unknown	Unknown polar	0.99	1.05	0.89	0.74	0.97	0.88	0.95	0.96	0.97	1.09	1.21	1.05
Unknown polar (58000140)	Unknown	Unknown polar	1.09	1.15	1.52	0.97	1.27	0.83	1.25	1.52	1.13	0.97	1.31	1.14
Unknown polar (58000141)	Unknown	Unknown polar	0.99	0.84	0.87	0.96	1.07	0.84	1.19	0.91	0.87	1.1	0.85	1.16
Unknown polar (58000142)	Unknown	Unknown polar	1.11	1.29	1.06	1.35	1.39	1.36	1.08	1.2	0.98	1.5	1.36	1.24
Unknown polar (58000143)	Unknown	Unknown polar	1.24	1.26	1.28	1.06	1.21	1.12	1.28	1.01	1.21	1.02	0.96	0.73
Unknown polar (58000144)	Unknown	Unknown polar	0.91	1	0.92	0.94	0.98	1.01	1.04	0.95	1.12	0.97	1.06	0.96
Unknown polar (58000145)	Unknown	Unknown polar	0.94	0.99	1.02	0.94	0.85	1.11	0.99	1.06	1.06	0.88	1.01	1.08
Unknown polar (58000146)	Unknown	Unknown polar	1.08	1.03	0.8	1	0.97	0.99	1.17	1.05	1.05	1.14	1	0.87
Unknown polar (58000147)	Unknown	Unknown polar	0.83	0.89	0.75	0.95	1	0.75	0.92	0.89	0.88	0.9	0.97	0.7
Unknown polar (58000148)	Unknown	Unknown polar	0.85	0.92	0.86	1.18	0.99	0.98	0.79	1.08	0.76	0.8	1.06	1.09
Unknown polar (58000149)	Unknown	Unknown polar	1.01	1.23	0.88	1.09	0.74	0.98	0.98	1.06	0.96	1.13	1.2	0.95
Unknown polar (58000152)	Unknown	Unknown polar	0.84	0.97	0.81	1.21	0.77	1.09	0.91	0.86	0.83	0.83	0.89	0.87
Unknown polar (58000153)	Unknown	Unknown polar	0.67	0.98	0.95	0.89	0.79	1.05	1.01	0.86	0.96	0.98	0.81	0.74
Unknown polar (58000154)	Unknown	Unknown polar	1.05	0.87	0.75	1.02	0.89	0.99	1.19	1.08	0.99	1.02	0.91	0.94
Unknown polar (58000155)	Unknown	Unknown polar	0.93	0.93	0.75	1.04	0.86	1.12	0.89	0.86	0.95	0.96	1.04	1.04
Unknown polar (58000156)	Unknown	Unknown polar	0.96	0.85	0.84	1.03	0.92	1.06	1.01	0.84	1	1.04	0.96	0.81
Unknown polar (58000157)	Unknown	Unknown polar	0.96	1.12	0.86	0.99	0.8	0.99	1.29	0.87	1.03	1.1	0.99	1.06
Unknown polar (58000158)	Unknown	Unknown polar	0.78	0.72	1.13	0.8	0.94	0.98	0.98	0.73	0.89	0.85	0.92	0.65
Unknown polar (58000159)	Unknown	Unknown polar	0.81	0.93	0.8	1.03	0.83	0.99	0.98	1.06	0.99	1.13	0.98	1.07
Unknown polar (58000160)	Unknown	Unknown polar	1.06	0.83	0.89	0.85	0.82	1.25	0.84	0.81	0.81	1.03	0.86	0.95
Unknown polar (58000161)	Unknown	Unknown polar	1.12	0.88	1	0.91	0.99	1.1	0.93	0.93	0.96	0.98	0.88	0.87
Unknown polar (58000162)	Unknown	Unknown polar	0.98	0.93	0.73	0.93	0.86	1.03	0.91	0.82	0.96	1.01	1.07	1.06
Unknown polar (58000164)	Unknown	Unknown polar	0.87	1.01	0.81	1.06	1.02	1.14	0.83	0.9	0.91	0.96	0.74	1.04
Unknown polar (58000165)	Unknown	Unknown polar	0.71	1.05	0.71	0.99	0.85	0.83	0.96	0.84	0.93	1.05	0.89	0.87
Unknown polar (58000166)	Unknown	Unknown polar	0.8	1.07	1.1	1.13	0.82	1.03	0.86	0.86	1.11	0.85	1.14	0.9
Unknown polar (58000167)	Unknown	Unknown polar	0.91	0.84	0.79	1.03	1.02	1.12	0.84	1.05	0.92	1.01	0.96	0.8
Unknown polar (58000168)	Unknown	Unknown polar	0.85	0.96	0.9	1.01	1.02	1.1	1.13	0.88	0.96	0.89	1.12	1.07
Unknown polar (58000169)	Unknown	Unknown polar	0.99	0.89	0.95	0.79	0.91	1	0.89	1.02	1.06	0.94	1.12	0.92
Unknown polar (58000170)	Unknown	Unknown polar	0.86	0.9	1.11	0.86	1.03	1.02	0.9	1.04	1.25	0.93	0.87	1.29
Unknown polar (58000171)	Unknown	Unknown polar	0.91	1.04	0.91	1	0.93	0.96	1.19	0.86	1.11	1	1.07	1.29
Unknown polar (58000172)	Unknown	Unknown polar	1.02	0.96	0.79	1.11	1.1	1.05	0.92	1.04	0.88	1.2	1.01	1.1
Lysophosphatidylcholine (C18:2)	Complex lipids, fatty acids and related	Lysophosphatidylcholines	1.07	1.14	0.84	1.25	1.05	1.18	0.95	1.07	0.9	1	1.23	0.93
Lysophosphatidylethanolamine (C22:5)	Complex lipids, fatty acids and related	Lysophosphatidylethanolamines	0.95	1.03	0.88	1.18	1.29	1.06	1.06	0.97	0.83	1.17	1.15	1.05
Lysophosphatidylcholine (C16:0)	Complex lipids, fatty acids and related	Lysophosphatidylcholines	0.98	0.99	1.07	1.09	1	0.97	0.92	1.05	0.93	1.02	1.05	1.1
Lysophosphatidylcholine (C18:1)	Complex lipids, fatty acids and related	Lysophosphatidylcholines	0.94	1.03	0.82	1.01	1.01	1	0.99	0.99	0.92	0.9	0.96	0.97
Lysophosphatidylcholine (C18:0)	Complex lipids, fatty acids and related	Lysophosphatidylcholines	1	1	1	1.05	1.1	1.05	0.94	1.05	1	0.95	1.06	1.01
Sphingomyelin (d18:2,C16:0)	Complex lipids, fatty acids and related	Sphingomyelins	1.07	0.91	0.96	1.16	1.45	1.18	1.01	0.97	0.9	0.96	1.17	0.83
Sphingomyelin (d18:2,C18:0)	Complex lipids, fatty acids and related	Sphingomyelins	1.03	1	1.02	1.57	1.51	1.54	1.2	1.11	1.16	1.05	1.15	0.87
Phosphatidylcholine (C16:1,C18:2)	Complex lipids, fatty acids and related	Phosphatidylcholines	1.06	0.88	0.7	1.38	1.28	1.64	1.02	0.92	0.88	0.84	0.98	0.99
Phosphatidylcholine (C16:0,C22:6) (additional: Phosphatidylcholine (C18:2,C20:4))	Complex lipids, fatty acids and related	Phosphatidylcholines	1.09	1.17	1.15	1.17	1.21	1.17	1.04	1.16	1.06	1	1.11	1.1
Phosphatidylcholine No 02	Complex lipids, fatty acids and related	Phosphatidylcholines	0.95	1.13	0.97	1.06	1.14	1.1	1.06	1.03	0.93	0.96	1.1	1.07
Phosphatidylcholine (C16:0,C18:2)	Complex lipids, fatty acids and related	Phosphatidylcholines	1.06	1.04	1.03	1.02	1.03	0.99	1.04	1	1.03	1.01	1.02	1.01
Phosphatidylcholine (C18:1,C18:2) (additional: Phosphatidylcholine (C16:0,C20:3))	Complex lipids, fatty acids and related	Phosphatidylcholines	0.97	1	0.9	1.04	1.04	1.02	0.97	1	0.92	0.98	1.01	1.01
Unknown lipid (68000015)	Unknown	Unknown lipid	0.9	0.78	0.94	1.25	1.15	1.18	1.13	1.09	0.75	1.04	1.2	1.09
Phosphatidylcholine (C16:0,C16:0)	Complex lipids, fatty acids and related	Phosphatidylcholines	0.93	0.96	0.87	0.92	1.14	1.41	0.93	0.84	0.74	0.82	0.96	0.89
Unknown lipid (68000017)	Unknown	Unknown lipid	1.22	1.09	1	1.26	1.14	1.25	1.1	0.83	0.96	1.01	1.14	1.24
Choline plasmalogen (C18,C20:4)	Complex lipids, fatty acids and related	Plasmalogens	0.99	0.97	0.89	1.13	1.5	1.29	1.05	0.88	0.87	0.88	1.04	0.97
Phosphatidylcholine (C18:0,C20:4)	Complex lipids, fatty acids and related	Phosphatidylcholines	1.01	0.99	0.94	1.02	1.01	0.98	0.97	0.98	0.98	1	1.01	0.98
Unknown lipid (68000020)	Unknown	Unknown lipid	1.08	0.99	0.91	1.33	1.37	1.07	0.97	0.8	0.68	0.98	1.1	0.93
Sphingomyelin (d18:1,C23:0)	Complex lipids, fatty acids and related	Sphingomyelins	1.04	0.92	1.04	1.38	1.46	1.36	1.01	0.96	0.98	0.94	1.1	0.95
DAG (C18:1,C18:2)	Complex lipids, fatty acids and related	Diacylglycerols	1.02	1.34	1.36	1.19	1.03	1.13	1.07	1.52	1.35	1.03	0.9	1.07
Ceramide (d18:1,C24:0)	Complex lipids, fatty acids and related	Ceramides	1.3	1.07	1.05	1.43	1.58	1.91	1.2	1.21	0.97	0.87	1.15	0.93
Unknown lipid (68000028)	Unknown	Unknown lipid	0.91	1.6	1.45	1.28	1.52	3.24	1.33	1.74	1.38	1	0.96	1.22
TAG (C18:2,C18:2)	Complex lipids, fatty acids and related	Triacylglycerols	1.19	1.44	2.01	1.43	1.53	1.09	1.37	1.3	1.66	1.4	1.27	1.41
TAG (C16:0,C18:2)	Complex lipids, fatty acids and related	Triacylglycerols	1.3	1.62	2.05	1.46	1.19	0.97	1.49	1.48	2.06	1.18	1.22	1.2
TAG (C18:1,C18:2)	Complex lipids, fatty acids and related	Triacylglycerols	1.08	1.76	1.81	1.38	1.3	1.2	1.19	1.38	1.69	1.34	1.35	1.27
Unknown lipid (68000033)	Unknown	Unknown lipid	0.8	0.91	0.97	0.98	1.08	0.98	0.88	0.84	0.87	0.92	1.14	1.15
Unknown lipid (68000034)	Unknown	Unknown lipid	0.85	1.07	1.09	1.34	1.11	1.11	0.98	0.97	0.88	1.17	1.21	0.88
Unknown lipid (68000035)	Unknown	Unknown lipid	1.03	0.96	1.01	1.08	1.2	1.04	1.04	0.96	1	1	1.04	1.07
Lysophosphatidylcholine (C17:0)	Complex lipids, fatty acids and related	Lysophosphatidylcholines	0.99	1	0.93	1.34	1.29	1.1	0.97	0.97	1	0.98	1.07	1.04
Unknown lipid (68000038)	Unknown	Unknown lipid	1.04	0.95	0.88	1.26	1.15	1.27	0.98	0.91	0.85	1.07	1.27	1.21
Lysophosphatidylcholine (C20:4)	Complex lipids, fatty acids and related	Lysophosphatidylcholines	1.02	0.99	0.92	1.01	0.97	1.02	0.99	1.04	0.96	0.99	1.02	1
TAG (C16:0,C16:1)	Complex lipids, fatty acids and related	Triacylglycerols	1.11	0.76	1.53	1.26	1.52	1.64	1.3	1.61	1.64	0.88	0.93	1
TAG (C18:2,C18:3)	Complex lipids, fatty acids and related	Triacylglycerols	1.36	1.51	1.81	1.88	1.63	1.87	1.63	1.73	1.65	1.36	1.37	1.29
Unknown lipid (68000045)	Unknown	Unknown lipid	0.98	0.92	0.81	1.01	0.98	0.91	0.89	0.81	0.88	0.82	1.07	1
Sphingomyelin (d18:1,C16:0)	Complex lipids, fatty acids and related	Sphingomyelins	1.01	1.02	1.01	1.04	1.03	1.01	1.09	0.95	0.93	0.99	1.02	0.99
Unknown lipid (68000047)	Unknown	Unknown lipid	0.96	1	0.91	1.09	1.27	1.42	1.04	0.95	0.83	0.98	0.94	0.89
Phosphatidylcholine (C16:0,C20:5)	Complex lipids, fatty acids and related	Phosphatidylcholines	1.05	1.1	0.99	1.18	1.26	1.05	1.01	1.08	0.96	1.03	1.07	1.02
Phosphatidylcholine (C16:0,C20:4) (additional: Phosphatidylcholine (C18:2,C18:2))	Complex lipids, fatty acids and related	Phosphatidylcholines	0.96	1.05	0.93	1.04	1	1	0.95	1	0.97	0.99	1.04	1.02
Phosphatidylcholine (C18:0,C18:2)	Complex lipids, fatty acids and related	Phosphatidylcholines	1.08	1.11	1.05	1.03	0.99	0.99	1.01	1.03	0.99	1	1	0.99
Phosphatidylcholine (C18:0,C18:1)	Complex lipids, fatty acids and related	Phosphatidylcholines	1.1	1.11	1.01	1.24	1.23	1.24	0.96	1.09	1	0.92	1.14	0.97
Unknown lipid (68000052)	Unknown	Unknown lipid	1.03	1.01	0.94	1.02	1	0.99	0.98	0.99	0.93	1.02	1	0.97
Phosphatidylcholine (C18:0,C20:3) (additional: Phosphatidylcholine (C20:1,C18:2), Phosphatidylcholine (C20:2,C18:1))	Complex lipids, fatty acids and related	Phosphatidylcholines	1.02	1.03	0.87	1.08	1.04	1.08	0.91	1	0.98	0.99	1.03	0.97
Sphingomyelin (d18:1,C24:0)	Complex lipids, fatty acids and related	Sphingomyelins	1.13	1.19	0.98	1.21	1.19	1.12	1.09	1.06	1	0.96	1.05	0.97
Phosphatidylcholine (C18:0,C22:6)	Complex lipids, fatty acids and related	Phosphatidylcholines	1.09	1.11	1.25	1.21	1.38	1.47	0.97	1.14	1.08	0.96	1.08	0.97
Unknown lipid (68000056)	Unknown	Unknown lipid	0.96	1.39	0.88	1.45	1.56	1.24	1.36	2.01	1.83	1.47	1.15	0.99
TAG (C16:0,C18:1,C18:3) (additional: TAG (C16:0,C18:2,C18:2), TAG (C16:1,C18:1,C18:2))	Complex lipids, fatty acids and related	Triacylglycerols	1.37	1.91	1.56	1.19	1.3	0.93	2.33	1.89	2.29	1.2	1.01	1.06
TAG (C18:1,C18:2,C18:3) (additional: TAG (C16:0,C18:1,C20:5), TAG (C16:0,C18:2,C20:4))	Unknown	Unknown lipid	1.27	1.72	1.88	1.15	1.12	1.02	1.62	1.35	1.61	1.12	1.03	1.19
Unknown lipid (68000059)	Unknown	Unknown lipid	1.08	1.57	1.9	1.63	1.35	1.7	1.33	1.42	1.53	1.16	1.33	1.35
Unknown lipid (68000060)	Unknown	Unknown lipid	1.18	1.05	0.87	1.28	1.39	1.15	1.09	1.11	0.86	0.83	1.26	1.09
Homovanillic acid (HVA)	Hormones, signal substances and related	Catecholamine catabolites	0.81	0.97	0.78	1.02	0.96	0.73	0.78	0.78	0.86	0.85	1.05	0.76
3,4-Dihydroxyphenylacetic acid (DOPAC)	Hormones, signal substances and related	Catecholamine catabolites	0.96	0.8	1	1.19	1.04	0.73	1.03	1.25	0.98	1.13	0.99	0.77
3,4-Dihydroxyphenylglycol (DOPEG)	Hormones, signal substances and related	Catecholamine catabolites	1	1.03	1.1	1.1	1.09	1.07	0.96	1	0.82	1.01	1.09	0.95
Serotonin (5-HT)	Hormones, signal substances and related	Serotonin and serotonin metabolism	0.71	0.43	0.74	1.06	1.59	1.42	1.15	1.03	0.56	1.61	1.61	1.48
Normetanephrine	Hormones, signal substances and related	Catecholamine catabolites	1.43	1.29	1.57	1.35	1.5	1.27	1.2	1.13	1.07	1.41	1.25	1.18
Metanephrine	Hormones, signal substances and related	Catecholamine catabolites	0.9	0.96	0.83	1.2	1.1	1.02	0.88	1	0.94	1.28	1.2	1
Dopamine	Hormones, signal substances and related	Catecholamines	1.05	1.05	0.94	0.99	1	1.02	0.92	1.01	1.1	0.94	0.99	0.99
Noradrenaline (Norepinephrine)	Hormones, signal substances and related	Catecholamines	0.85	0.87	0.91	0.78	0.92	0.76	0.83	0.89	0.93	1.32	0.83	1.14
Adrenaline (Epinephrine)	Hormones, signal substances and related	Catecholamines	0.59	0.86	0.45	0.78	0.85	0.39	0.86	1.18	0.87	1.31	0.87	0.42
3,4-Dihydroxyphenylalanine (DOPA)	Hormones, signal substances and related	Catecholamine precursors	0.84	0.85	1.16	0.81	0.85	0.9	1.06	0.84	0.92	0.9	0.84	0.83
3-Methoxytyrosine	Hormones, signal substances and related	Catecholamine catabolites	0.9	0.78	0.78	1.2	1.01	1.23	1.13	0.84	0.89	1.03	0.95	1.17
4-Hydroxy-3-methoxyphenylglycol (HMPG)	Hormones, signal substances and related	Catecholamine catabolites	1.04	0.97	1.05	1.41	1.2	1.13	0.97	1	0.97	1.34	1.22	1.04
Histamine	Hormones, signal substances and related	Other hormones, signal substances and related	1.24	1.63	0.93	1.35	1.23	0.84	0.74	0.84	0.78	0.99	1.7	2.12
Androstenedione	Hormones, signal substances and related	Steroids and related	1.41	1.28	0.49	1.26	1.06	0.58	1.01	0.9	1.03	1.48	2.76	0.43
Testosterone	Hormones, signal substances and related	Steroids and related	0.71	1.01	1.12	1.23	1.41	0.48	0.95	1.03	1.28	2.58	2.05	1.24
Progesterone	Hormones, signal substances and related	Steroids and related	0.44	0.8	0.66	1.72	3.56	0.52	0.53	1.09	0.5	1.82	1.07	0.32
21-Hydroxyprogesterone (11-Deoxycorticosterone)	Hormones, signal substances and related	Steroids and related	1.08	1.2	0.67	2.03	3.37	0.53	0.5	0.82	0.24	2.92	1.6	0.53
18-Hydroxy-11-deoxycorticosterone	Hormones, signal substances and related	Steroids and related	0.93	1.03	0.87	2.64	2.8	0.41	0.57	1.27	0.35	2.47	2.12	0.33
Corticosterone	Hormones, signal substances and related	Steroids and related	0.86	1.28	0.8	2.28	2.14	0.45	0.58	1.19	0.38	2.28	1.57	0.45

## Sheet: Captopril
Profile name:	Captopril
pValue:	0.05
			Captopril (MOA68) HD	Captopril (MOA68) HD	Captopril (MOA68) HD	Captopril (MOA68) HD	Captopril (MOA68) HD	Captopril (MOA68) HD	Captopril (MOA68) LD	Captopril (MOA68) LD	Captopril (MOA68) LD	Captopril (MOA68) LD	Captopril (MOA68) LD	Captopril (MOA68) LD
Metabolite Name	Class	Subclass	f7	f14	f28	m7	m14	m28	f7	f14	f28	m7	m14	m28
Threonine	Amino acids	Amino acids, neutral	0.93	1.01	0.95	1	0.88	0.9	0.95	1.11	1.05	0.9	0.98	0.99
Tryptophan	Amino acids	Amino acids, aromatic	0.9	0.94	0.79	1.08	1.14	0.99	0.96	1.1	1.01	1.15	0.95	1.22
Arginine	Amino acids	Amino acids, basic	0.96	0.96	0.93	0.99	1.03	1.11	1.03	0.99	1	1.02	0.92	1.1
Citrulline	Amino acids related	Urea cycle and related	0.9	1.06	0.93	0.92	0.96	0.99	0.94	0.99	0.92	0.98	1.05	0.96
Glutamate	Amino acids	Amino acids, acidic	0.9	1.26	0.92	1.03	1.18	0.94	0.96	1.06	0.96	0.99	0.94	0.91
Phenylalanine	Amino acids	Amino acids, aromatic	0.9	0.97	0.93	0.98	1	0.95	0.91	0.92	1.04	1	0.97	1.15
alpha-Tocopherol	Vitamins, cofactors and related	Tocopherols and related	0.88	1.02	0.94	0.9	0.78	0.97	1.08	1.11	1	0.87	0.79	0.8
Pantothenic acid	Vitamins, cofactors and related	Acyl-carriers and related	0.72	1.1	0.96	1.21	1.1	1.61	0.82	0.84	1.07	1.14	1.01	1.24
Taurine	Amino acids	Amino acids, S-containing	0.75	1.36	1.39	1.25	0.94	0.91	0.82	1.25	1.2	1.41	0.98	1.37
Malate	Energy metabolism and related	Citrate cycle	0.93	0.69	0.67	0.71	0.83	1.06	0.91	0.85	0.82	0.91	0.79	1.25
Fructose-6-phosphate (additional: Glucose-6-phosphate, myo-Inositol-1-phosphate, myo-Inositol-2-phosphate, myo-Inositol-4-phosphate)	Energy metabolism and related	Glycolysis/Gluconeogenesis	1.47	1.71	1.25	1.75	0.9	0.94	0.96	1.16	1.31	1.35	1.01	1.21
Salicylic acid	Miscellaneous	Miscellaneous	0.65	0.67	0.55	0.87	1.52	1.09	0.6	1.32	0.92	0.57	0.95	1.07
Coenzyme Q9	Vitamins, cofactors and related	Redox-carrier and related	0.92	1.09	1.02	0.94	0.87	0.95	0.98	1.15	0.91	0.81	0.97	0.71
Cholic acid	Complex lipids, fatty acids and related	Bile acids	1.18	1.67	5.51	3.02	1.46	0.62	4.18	1.2	0.39	2.39	0.58	6.43
Creatinine	Amino acids related	Creatine metabolism	0.77	1.23	1.01	1.1	1.08	0.84	0.87	0.98	0.96	1.06	1.03	0.94
Creatine	Amino acids related	Creatine metabolism	1.13	1.18	1.33	1.16	1.06	1.31	1.1	1.18	1.26	1.21	1.23	1.39
Kynurenic acid	Amino acids related	Tryptophan metabolism	0.53	1	1.12	1.64	1.45	1.08	1.21	1.14	1.66	1.09	1.21	1.62
Taurocholic acid	Complex lipids, fatty acids and related	Bile acids	0.58	0.79	1.81	1.12	0.88	0.96	0.62	1.02	0.72	0.74	1.31	0.9
Glycochenodeoxycholic acid (additional: Glycodeoxycholic acid)	Complex lipids, fatty acids and related	Bile acids	1.49	4.58	1.24	2.42	1.25	3.37	1.54	0.57	3.15	0.73	1.29	1.1
Glycerol, lipid fraction	Complex lipids, fatty acids and related	Fatty alcohols	0.82	1.23	1.09	0.9	0.55	0.86	0.89	1.06	0.92	0.74	0.58	0.5
Palmitic acid (C16:0)	Complex lipids, fatty acids and related	Fatty acids, saturated	0.85	1.19	1.08	0.9	0.69	0.87	1.04	1.19	0.97	0.86	0.82	0.77
Linoleic acid (C18:cis[9,12]2)	Complex lipids, fatty acids and related	Fatty acids, poly-unsaturated	0.82	1.29	1.09	1.04	0.73	0.89	1.07	1.33	0.95	0.73	0.74	0.69
Oleic acid (C18:cis[9]1)	Complex lipids, fatty acids and related	Fatty acids, mono-unsaturated	1.04	1.2	1.12	0.95	0.76	0.98	0.98	1.13	0.87	0.91	0.9	0.84
Stearic acid (C18:0)	Complex lipids, fatty acids and related	Fatty acids, saturated	1.01	1.01	1.07	0.92	0.8	1	1.08	1.18	1.17	0.82	0.79	0.84
Arachidonic acid (C20:cis[5,8,11,14]4)	Complex lipids, fatty acids and related	Fatty acids, poly-unsaturated	0.92	1.04	1.01	0.88	0.84	0.9	0.99	1.14	1.03	0.81	0.82	0.85
Docosahexaenoic acid (C22:cis[4,7,10,13,16,19]6)	Complex lipids, fatty acids and related	Fatty acids, poly-unsaturated	1.03	0.95	0.98	0.88	0.67	0.86	1.35	1.4	1.4	0.71	0.68	0.74
Cholesterol, total	Complex lipids, fatty acids and related	Cholesterol and related	0.89	1.02	1.05	0.92	0.93	0.99	0.98	1.2	1.02	0.8	0.88	0.93
beta-Sitosterol	Miscellaneous	Diet related	1.07	0.96	1	0.69	0.53	0.58	1.32	1.18	1.25	0.72	0.69	0.76
Glycerol phosphate, lipid fraction	Complex lipids, fatty acids and related	Phospholipid metabolites	1.01	1.08	1.05	1	0.79	1	1.13	1.21	1.18	0.94	0.77	0.88
Galactose, lipid fraction	Complex lipids, fatty acids and related	Glycolipids	1.06	1.17	1.05	0.85	0.91	0.96	1	1.4	0.95	0.73	0.9	0.99
Lignoceric acid (C24:0)	Complex lipids, fatty acids and related	Fatty acids, saturated	0.91	0.95	0.87	1.03	0.81	1.04	1.14	1.2	0.99	0.86	0.85	0.83
Campesterol	Miscellaneous	Diet related	0.97	0.98	1	0.68	0.52	0.68	1.23	1.38	1.2	0.69	0.73	0.74
Hexadecanol	Complex lipids, fatty acids and related	Fatty alcohols	1.32	1.12	1.39	1.01	1.16	0.92	1.41	0.97	1	1.11	1.12	1.01
Heneicosanoic acid (C21:0) (additional: Behenic acid (C22:0))	Complex lipids, fatty acids and related	Fatty acids, saturated	1.14	1.04	1.04	1.12	1.1	0.99	1.15	0.99	0.97	0.89	0.86	0.93
Dodecanol	Complex lipids, fatty acids and related	Fatty alcohols	0.79	1.22	1.03	0.85	0.9	0.85	1.14	1.17	0.96	0.86	0.71	0.74
Heptadecanoic acid (C17:0)	Complex lipids, fatty acids and related	Fatty acids, saturated	0.95	1.2	1.06	1.02	1	0.84	1.22	1.17	0.9	0.79	0.82	0.79
Eicosanoic acid (C20:0)	Complex lipids, fatty acids and related	Fatty acids, saturated	0.93	0.85	0.9	1.18	0.87	0.9	1.07	0.9	1.13	0.87	0.96	0.85
Tricosanoic acid (C23:0)	Complex lipids, fatty acids and related	Fatty acids, saturated	0.93	0.9	0.86	1.04	0.9	1.03	1.04	1.01	1.06	0.91	0.78	0.83
Phosphate, lipid fraction	Complex lipids, fatty acids and related	Phospholipid metabolites	1.02	1.07	1.06	0.93	0.89	1.05	1.11	1.11	1.05	0.92	0.9	0.91
Myristic acid (C14:0)	Complex lipids, fatty acids and related	Fatty acids, saturated	0.83	1.16	0.98	0.8	0.65	1.15	0.94	1.14	0.87	0.89	0.9	1.09
myo-Inositol-2-phosphate, lipid fraction (myo-Inositolphospholipids)	Complex lipids, fatty acids and related	Phospholipid metabolites	0.94	1.17	0.98	1.18	0.69	0.96	1.2	1.18	1.27	1.03	0.87	0.83
Behenic acid (C22:0)	Complex lipids, fatty acids and related	Fatty acids, saturated	1.02	0.91	0.92	0.92	0.91	0.96	1.16	1.05	1.09	0.75	0.7	0.88
4-Hydroxysphinganine (t18:0, Phytosphingosine), total	Complex lipids, fatty acids and related	Sphingolipids	1.04	1.17	1.11	0.96	1.03	0.77	1.3	1.18	1.14	0.83	0.88	0.79
Nervonic acid (C24:cis[15]1)	Complex lipids, fatty acids and related	Fatty acids, mono-unsaturated	1.13	1.05	0.77	1.12	1.33	1.03	1.21	1.18	0.89	0.9	1.27	0.93
Urea	Amino acids related	Urea cycle and related	1.12	1.17	0.92	0.94	0.99	0.96	0.97	1	0.94	1.05	1.2	1.09
Isopalmitic acid (C16:0)	Complex lipids, fatty acids and related	Fatty acids, saturated	1.01	0.95	1.04	0.78	0.64	0.83	1.26	0.99	0.97	0.89	0.78	0.55
Palmitoleic acid (C16:cis[9]1)	Complex lipids, fatty acids and related	Fatty acids, mono-unsaturated	0.92	1.4	1.1	0.9	0.51	0.94	1.1	1.09	0.87	1.07	0.99	0.89
Unknown lipid (28000473)	Unknown	Unknown lipid	0.85	0.76	0.9	0.92	0.82	1.02	1.1	0.96	0.65	0.66	0.76	0.97
14-Methylhexadecanoic acid	Complex lipids, fatty acids and related	Fatty acids, branched	1.16	0.89	0.94	0.93	1.05	1.02	0.79	0.79	0.95	0.97	1.08	0.9
gamma-Linolenic acid (C18:cis[6,9,12]3)	Complex lipids, fatty acids and related	Fatty acids, poly-unsaturated	0.85	1.2	1.15	0.61	0.51	0.65	0.95	1.02	0.87	0.43	0.61	0.51
16-Methylheptadecanoic acid	Complex lipids, fatty acids and related	Fatty acids, branched	0.87	1.24	1.1	0.62	0.53	0.78	0.79	1.17	1.27	0.62	0.65	0.57
17-Methyloctadecanoic acid	Complex lipids, fatty acids and related	Fatty acids, branched	0.94	0.94	1.27	0.9	0.76	0.88	1.06	1.07	1.14	0.74	0.69	0.66
dihomo-gamma-Linolenic acid (C20:cis[8,11,14]3)	Complex lipids, fatty acids and related	Fatty acids, poly-unsaturated	0.58	1.19	0.95	0.95	0.65	0.88	0.63	1.14	1	0.99	0.68	0.61
Eicosaenoic acid (C20:1) No 02	Complex lipids, fatty acids and related	Fatty acids, mono-unsaturated	0.95	0.92	1.24	0.68	0.61	0.8	0.89	0.81	1.06	0.65	0.93	0.78
3-O-Methylsphingosine (d18:1) (additional: Sphingolipids, erythro-Sphingosine (d18:1), threo-Sphingosine (d18:1))	Complex lipids, fatty acids and related	Sphingolipids	1.06	0.94	0.98	1	0.84	0.98	1.17	1.08	1.05	0.84	0.82	0.9
threo-Sphingosine (d18:1) (additional: Sphingolipids)	Complex lipids, fatty acids and related	Sphingolipids	0.84	1.12	0.91	1.03	0.88	1.07	1.01	1.18	1.03	0.93	0.82	0.9
Docosapentaenoic acid (C22:cis[7,10,13,16,19]5)	Complex lipids, fatty acids and related	Fatty acids, poly-unsaturated	0.83	1.01	0.82	0.82	0.56	0.76	1.08	1.37	1.13	0.68	0.76	0.55
5-O-Methylsphingosine (d18:1) (additional: Sphingolipids, erythro-Sphingosine (d18:1), threo-Sphingosine (d18:1))	Complex lipids, fatty acids and related	Sphingolipids	1.02	0.96	1.01	0.91	0.77	1.01	1.21	1.1	1.09	0.75	0.73	0.88
erythro-Sphingosine (d18:1) (additional: Sphingolipids)	Complex lipids, fatty acids and related	Sphingolipids	1	0.97	0.94	0.94	0.84	0.98	1.18	1.17	1.12	0.83	0.76	0.86
Elaidic acid (C18:trans[9]1)	Complex lipids, fatty acids and related	Fatty acids, mono-unsaturated	0.95	1.18	1.22	0.92	0.88	0.84	1.03	1.23	1.11	1.05	0.92	0.99
myo-Inositol, lipid fraction	Complex lipids, fatty acids and related	Glycolipids	0.91	1.06	1.03	1.01	0.83	1.02	1.17	1.16	1.09	0.89	0.86	0.94
Pyruvate (additional: Phosphoenolpyruvate (PEP))	Energy metabolism and related	Glycolysis/Gluconeogenesis	1.38	0.8	0.83	0.9	0.67	1.19	0.72	0.73	0.94	0.56	0.83	1
Alanine	Amino acids	Amino acids, neutral	0.92	0.98	1.05	1.05	0.93	1.01	0.89	1.08	0.95	0.89	1.01	1.09
Glycine	Amino acids	Amino acids, neutral	0.9	0.93	0.98	0.98	0.77	0.92	0.87	0.95	0.92	1.01	1.02	0.99
Methionine	Amino acids	Amino acids, S-containing	0.94	0.93	1	1.04	0.92	1.08	0.93	1	1.05	1.01	1.02	1.07
5-Oxoproline (additional: Folic acid, Glutamate, Glutamine)	Amino acids related	Amino acid metabolites	1.02	1.02	1.01	1.07	0.95	1.06	1.05	1.05	1.08	1.05	0.97	1.04
Cysteine (additional: Cystine)	Amino acids	Amino acids, S-containing	0.89	0.66	0.79	0.59	0.77	0.72	0.91	0.86	0.71	0.62	0.8	0.69
Citrate	Energy metabolism and related	Citrate cycle	0.94	0.95	0.88	0.91	0.76	0.96	0.94	0.9	0.87	0.91	0.91	0.91
Lysine	Amino acids	Amino acids, basic	1.07	0.85	1.02	1.05	0.97	1.06	0.95	1.07	1.19	0.95	0.84	1.08
myo-Inositol	Carbohydrates and related	Polyols	0.86	1.08	0.99	0.81	0.82	1.11	0.78	0.92	0.82	1.02	0.95	1.15
Sucrose	Carbohydrates and related	Disaccharides	0.64	0.58	0.63	1.1	0.61	1.29	0.67	0.8	0.59	0.75	0.88	0.82
Mannose	Carbohydrates and related	Monosaccharides	1	0.99	0.88	1.04	0.97	1.04	1.06	0.96	1.01	0.81	0.9	1.02
Glucose (additional: Galactose, Gluconic acid, Mannitol)	Carbohydrates and related	Monosaccharides	0.99	0.93	0.92	0.8	1.01	1.14	0.9	1.04	0.84	0.8	1.07	0.99
Glycerol, polar fraction	Complex lipids, fatty acids and related	Lipid precursors	1.02	0.87	1	1.14	0.99	1.12	1.16	0.91	0.9	1.14	0.94	1.06
Spermidine	Miscellaneous	Polyamines	1.09	1.11	0.85	1.29	0.96	1.05	0.86	1.04	0.88	1.25	1.19	1.2
Glutamine	Amino acids	Amino acids, basic	1.13	0.94	1.14	1.12	0.82	1.05	1.08	1.23	1.29	0.96	0.87	1.12
Ornithine (additional: Arginine, Citrulline)	Amino acids related	Urea cycle and related	1.01	0.95	1.06	1.03	0.98	1.12	0.84	1.03	1.19	0.91	0.86	1.24
Phosphate (inorganic and from organic phosphates)	Miscellaneous	Miscellaneous	1.14	1.03	1.04	1.07	0.94	1.12	0.9	0.92	1.26	0.95	0.95	1.02
Serine	Amino acids	Amino acids, neutral	0.98	1.04	1.03	1.07	0.96	1.12	1.1	1.16	1.03	0.96	0.97	1.09
Glycerol-3-phosphate, polar fraction	Complex lipids, fatty acids and related	Lipid precursors	1.11	1.24	1.54	1.28	0.97	1.29	1.01	1.27	1.86	1.41	0.99	1.83
Valine	Amino acids	Amino acids, branched chain	1.11	0.97	1.02	0.95	1.02	1	0.97	0.98	1.08	1	1.04	1.15
Aspartate	Amino acids	Amino acids, acidic	1.36	1.23	1.13	1.32	0.95	1.29	0.89	1.14	1.23	1.17	0.81	1.71
Isoleucine	Amino acids	Amino acids, branched chain	1.03	1.03	1.09	0.99	0.96	0.94	0.99	0.96	1.18	0.97	1.07	1.17
Leucine	Amino acids	Amino acids, branched chain	1.03	1.12	1.12	0.97	0.96	0.98	0.97	0.96	1.23	0.97	1.05	1.27
Proline	Amino acids	Amino acids, neutral	0.94	1.09	1.13	1.07	1.02	1.09	0.96	1.04	1	0.9	1.06	1.02
Threonic acid	Vitamins, cofactors and related	Ascorbic acid and related	0.85	1.12	1.03	1.37	1.27	1.14	1.28	0.99	1.36	1.08	1.03	1.52
Lactate	Energy metabolism and related	Glycolysis/Gluconeogenesis	1.52	0.76	1.06	0.95	0.93	0.96	0.8	0.71	1	0.78	1.18	1.15
Glycolate	Miscellaneous	Miscellaneous	1.01	1.02	0.79	0.89	1.02	1.03	0.98	0.94	0.93	0.91	1	1.05
Asparagine	Amino acids	Amino acids, basic	1.04	1.01	1.18	0.99	1.13	1.15	0.97	1.08	1.04	0.9	1	1.11
Ascorbic acid (additional: Glucose)	Vitamins, cofactors and related	Ascorbic acid and related	0.91	1.03	0.95	0.9	1.05	0.88	0.88	1.12	0.81	0.85	1.15	1.05
Tyrosine	Amino acids	Amino acids, aromatic	0.95	0.95	0.87	0.98	1	1.02	0.92	0.91	0.89	0.95	0.99	0.99
Unknown polar (38000389)	Unknown	Unknown polar	0.65	1.18	1.03	0.72	0.38	0.86	0.77	1.27	0.98	1.82	0.51	1.26
3-Hydroxybutyrate	Energy metabolism and related	Ketone bodies	0.95	1.11	1.1	1.17	0.83	0.92	1.1	0.95	0.8	1.05	0.83	0.74
Ribal (additional: 2'-Deoxyadenosine, 2'-Deoxycytidine, 2'-Deoxyguanosine, 2'-Deoxythymidine, 2'-Deoxyuridine)	Carbohydrates and related	Nucleobase related saccharides	1.05	1.01	0.98	0.98	0.89	0.81	0.8	0.88	0.93	0.89	0.95	0.99
Unknown polar (38000433)	Unknown	Unknown polar	1.09	0.88	0.86	1.03	0.93	0.9	1.06	0.86	1.03	1.05	0.99	1.1
trans-4-Hydroxyproline	Amino acids related	Collagen metabolism	0.99	0.99	1.06	1.04	0.84	1.03	0.79	0.8	0.91	0.99	0.85	0.92
Cytosine (additional: 2'-Deoxycytidine)	Nucleobases and related	Pyrimidine metabolism	0.79	1.05	0.96	0.94	0.76	0.98	0.83	0.84	0.97	0.82	0.96	0.96
Unknown polar (38000449)	Unknown	Unknown polar	0.53	1.22	1.05	0.75	0.41	0.91	0.73	1.31	0.94	2.3	1.13	1.4
1,5-Anhydrosorbitol	Carbohydrates and related	Polyols	1.09	0.99	1.16	1.37	1.48	1.35	1.17	1.05	1.14	1.07	1.26	1.17
Histidine	Amino acids	Amino acids, basic	1.11	0.97	1.16	1.07	0.94	1.06	1	1.1	1.32	0.88	0.99	1.26
Uracil	Nucleobases and related	Pyrimidine metabolism	0.91	1.02	1.17	1.03	0.94	0.93	0.8	1.09	1.13	1	1.1	1.33
Xylitol	Carbohydrates and related	Polyols	0.67	1.17	1.31	1.28	0.94	1.42	0.97	1.34	0.97	1.09	0.95	0.93
3-Hydroxyindole (additional: 3-Indoxylsulfate)	Amino acids related	Tryptophan metabolism	1.43	1.35	1.21	1.35	1.32	1.09	1.52	1.44	1.36	1.04	1.34	0.7
Glucuronic acid	Carbohydrates and related	Sugar acids	0.79	0.97	0.87	1.23	1.04	1.06	1.35	1.2	1.29	0.88	0.89	1.16
Indole-3-acetic acid	Amino acids related	Tryptophan metabolism	1.29	0.75	0.44	0.91	1.11	0.9	1.71	1.09	0.83	0.85	0.77	0.58
Pseudouridine	Nucleobases and related	Pyrimidine metabolism	0.98	1.14	0.93	1.03	1.03	0.91	0.96	0.88	1.11	1.07	0.99	0.94
Uric acid	Nucleobases and related	Purine metabolism	0.98	1.15	1.22	1.76	1.24	1.27	0.89	0.9	1.24	1.47	1.24	1.7
scyllo-Inositol	Carbohydrates and related	Polyols	0.89	0.97	0.92	0.94	0.88	1.2	0.82	1.08	0.83	1.21	1.26	1.21
Erythronic acid	Carbohydrates and related	Sugar acids	0.9	0.93	1.13	1.1	1.19	1.04	0.94	0.85	0.82	1.15	1.1	1.08
Allantoin	Nucleobases and related	Purine metabolism	0.95	1.04	0.96	0.98	1.31	1.21	0.86	0.83	0.99	1	1.1	1.02
3-Hydroxyisobutyrate	Amino acids related	Amino acid metabolites	NA	NA	NA	NA	NA	NA	NA	NA	NA	NA	NA	NA
Cystine	Amino acids	Amino acids, S-containing	0.84	0.62	0.8	0.84	0.7	0.85	0.9	0.76	0.59	1	1.27	0.53
3-Phosphoglycerate (3-PGA)	Energy metabolism and related	Glycolysis/Gluconeogenesis	0.8	1.04	1.14	1.38	0.81	1.19	1.05	1.56	0.91	1.27	0.88	2.39
2-Hydroxybutyrate	Energy metabolism and related	Energy metabolism, miscellaneous	1.32	1.24	1.31	1.02	0.99	0.94	1.32	1.06	1.39	1.23	0.92	1.19
Ketoleucine	Amino acids related	Amino acid metabolites	0.92	0.87	0.98	1.09	0.99	0.98	0.86	0.83	1.21	0.89	1.1	1.18
Mannosamine	Carbohydrates and related	Aminosugars	1.66	0.69	1.04	0.89	0.89	0.87	1.29	1.35	0.93	0.86	0.82	1.11
Glucosamine	Carbohydrates and related	Aminosugars	1.22	0.4	1.06	0.92	1.49	1	1.77	1.45	1.01	1.01	0.91	1.21
Indole-3-lactic acid	Amino acids related	Tryptophan metabolism	0.9	1.07	0.97	1	0.93	0.9	1.04	1.12	1.17	1.13	0.95	1.25
Unknown polar (58000010)	Unknown	Unknown polar	0.95	1.2	1.56	0.94	0.87	1.13	0.91	1.26	1	0.88	1	2.07
Unknown polar (58000014)	Unknown	Unknown polar	1.04	0.6	1	1.32	1.49	0.66	1.27	1.21	0.64	1.12	0.74	0.94
Unknown polar (58000017)	Unknown	Unknown polar	NA	0.52	1.4	0.83	0.67	1.7	NA	NA	1	1.29	0.42	NA
Unknown polar (58000018)	Unknown	Unknown polar	1.09	1.09	0.95	0.9	0.94	0.9	0.88	1.1	0.97	0.96	0.88	1.01
Hippuric acid	Miscellaneous	Miscellaneous	0.36	1.25	0.17	0.28	1.37	0.54	0.43	0.9	0.32	0.61	1.15	0.74
3-Indoxylsulfate	Amino acids related	Tryptophan metabolism	1.65	1.2	1.21	1.25	1.29	1.18	1.7	1.43	1.48	1.37	0.46	0.84
Succinate	Energy metabolism and related	Citrate cycle	0.95	1.03	1.01	1.05	0.9	1.01	1.06	1.01	1.08	1.07	0.88	0.92
Unknown polar (58000132)	Unknown	Unknown polar	0.95	1.14	0.95	0.93	1	1.17	1	0.92	1.34	1.05	0.98	1.25
Unknown polar (58000133)	Unknown	Unknown polar	0.97	0.86	0.91	0.97	0.85	1	0.97	1.11	0.9	0.81	1.04	0.87
Unknown polar (58000140)	Unknown	Unknown polar	0.79	0.77	0.76	0.85	0.83	0.91	1.05	1.33	0.58	0.79	0.82	0.93
Unknown polar (58000141)	Unknown	Unknown polar	0.81	1.02	1.04	0.95	1.04	1	0.99	1.07	0.96	1.02	0.98	0.78
Unknown polar (58000142)	Unknown	Unknown polar	1.02	0.96	1.12	1.09	0.9	0.98	1.03	1.01	0.98	1.07	0.95	0.98
Unknown polar (58000143)	Unknown	Unknown polar	0.88	1.01	0.97	0.9	0.85	1.14	0.87	0.98	0.93	0.92	1	1.06
Unknown polar (58000144)	Unknown	Unknown polar	0.96	0.89	0.93	0.81	1.04	1.11	1.02	1.14	1.05	0.93	0.96	1.02
Unknown polar (58000145)	Unknown	Unknown polar	0.93	0.81	1.02	0.72	0.96	1.13	0.91	1.01	1.02	1.11	0.92	0.95
Unknown polar (58000146)	Unknown	Unknown polar	0.99	1.01	1.09	0.92	1	0.84	0.97	0.92	1.14	0.88	1.11	1.09
Unknown polar (58000147)	Unknown	Unknown polar	0.83	1.05	1.09	0.89	1.07	1.07	1.05	0.95	1.26	0.96	1.06	1.1
Unknown polar (58000148)	Unknown	Unknown polar	1.34	0.8	0.78	0.92	0.88	1.04	0.89	1	1.02	1.1	0.65	1.05
Unknown polar (58000149)	Unknown	Unknown polar	0.83	0.82	1.03	0.83	0.99	0.81	0.93	1.13	1.08	1.05	1.13	0.83
Unknown polar (58000152)	Unknown	Unknown polar	0.99	0.92	0.81	0.87	0.81	1.09	0.85	0.91	0.71	0.98	0.84	0.89
Unknown polar (58000153)	Unknown	Unknown polar	1.02	0.85	1.07	1.01	1	0.89	0.95	1.36	0.98	1.06	1.04	1.11
Unknown polar (58000154)	Unknown	Unknown polar	0.86	1.03	0.96	0.97	0.97	0.91	0.99	0.98	0.86	0.91	0.92	0.88
Unknown polar (58000155)	Unknown	Unknown polar	0.91	0.87	1.01	0.81	0.99	1.04	1	1.22	1.24	0.88	1.06	0.96
Unknown polar (58000156)	Unknown	Unknown polar	1.03	0.79	1.17	1.02	1.04	0.97	0.77	1.14	0.93	0.82	1.5	0.9
Unknown polar (58000157)	Unknown	Unknown polar	0.93	0.88	1.1	1.01	0.98	0.88	1.11	1.04	0.94	1.13	1	0.97
Unknown polar (58000158)	Unknown	Unknown polar	0.75	1.33	0.81	1.33	1.27	1.33	0.93	1.17	1.11	1.8	1.07	1.4
Unknown polar (58000159)	Unknown	Unknown polar	0.99	1.02	1.1	1.07	1.03	0.88	1.09	0.9	1.01	1.05	1.15	1.1
Unknown polar (58000160)	Unknown	Unknown polar	0.84	1.12	1.03	0.84	1.01	0.99	1.11	0.9	0.82	1.02	0.93	1.1
Unknown polar (58000161)	Unknown	Unknown polar	0.94	1.07	1.01	1.15	1.02	0.97	1.08	1.09	1.03	0.95	1.3	0.89
Unknown polar (58000162)	Unknown	Unknown polar	0.73	1.06	0.95	1.02	1.09	1.08	1.04	1.05	1.03	1	1.13	0.99
Unknown polar (58000164)	Unknown	Unknown polar	0.93	0.94	0.99	0.92	1.19	0.91	0.92	0.86	0.88	0.9	0.97	1.09
Unknown polar (58000165)	Unknown	Unknown polar	0.94	0.71	1.05	0.92	1.1	1.04	1.09	1.16	1.01	1.08	1.15	1.01
Unknown polar (58000166)	Unknown	Unknown polar	0.86	1.2	1.03	0.73	1.17	1.15	1	0.98	0.83	0.78	1.26	0.81
Unknown polar (58000167)	Unknown	Unknown polar	0.9	1.1	1.01	1.13	1.13	1.31	0.95	0.98	1	1.05	1.03	0.96
Unknown polar (58000168)	Unknown	Unknown polar	1.02	1.21	1.06	1.06	1.04	1.08	1.02	1.35	1.1	0.97	1.1	1.29
Unknown polar (58000169)	Unknown	Unknown polar	0.8	1.04	1.03	0.96	1.01	0.79	0.97	1.29	1.01	0.77	0.8	1.3
Unknown polar (58000170)	Unknown	Unknown polar	1.04	0.8	1.16	0.94	0.86	1.06	1.28	1.26	0.97	0.96	0.96	0.96
Unknown polar (58000171)	Unknown	Unknown polar	0.86	0.9	0.87	0.85	0.87	1.23	1.13	1.19	0.9	0.75	0.91	0.79
Unknown polar (58000172)	Unknown	Unknown polar	0.97	1.15	0.94	0.96	1.07	0.96	1.06	0.99	1.16	1.01	1.09	0.98
Lysophosphatidylcholine (C18:2)	Complex lipids, fatty acids and related	Lysophosphatidylcholines	1.07	0.99	0.99	1.07	1.2	1.09	1.13	1.04	1.08	1.02	0.98	1.1
Lysophosphatidylethanolamine (C22:5)	Complex lipids, fatty acids and related	Lysophosphatidylethanolamines	1.07	1	1.17	0.94	0.84	1.14	0.82	1.39	1.04	0.91	0.96	0.98
Lysophosphatidylcholine (C16:0)	Complex lipids, fatty acids and related	Lysophosphatidylcholines	0.88	1.09	1.13	1.08	0.97	1	1.02	1.07	1.06	1.05	1.06	1.14
Lysophosphatidylcholine (C18:1)	Complex lipids, fatty acids and related	Lysophosphatidylcholines	0.98	1.03	1.09	1.08	0.92	0.99	1	1.1	1.11	0.85	1.05	0.95
Lysophosphatidylcholine (C18:0)	Complex lipids, fatty acids and related	Lysophosphatidylcholines	0.99	1.01	0.99	1.02	1.01	1.02	0.97	1	1.04	1.01	0.99	1.02
Sphingomyelin (d18:2,C16:0)	Complex lipids, fatty acids and related	Sphingomyelins	0.89	0.98	1.02	1.05	0.84	0.99	0.99	1.04	0.89	1.01	0.92	0.88
Sphingomyelin (d18:2,C18:0)	Complex lipids, fatty acids and related	Sphingomyelins	0.98	1.14	0.81	1.07	0.94	1.11	0.98	1.04	0.79	0.87	0.98	1.12
Phosphatidylcholine (C16:1,C18:2)	Complex lipids, fatty acids and related	Phosphatidylcholines	0.87	1.29	1.04	1.14	0.78	0.95	1.07	0.92	0.9	0.96	0.8	1.02
Phosphatidylcholine (C16:0,C22:6) (additional: Phosphatidylcholine (C18:2,C20:4))	Complex lipids, fatty acids and related	Phosphatidylcholines	1.05	0.99	0.96	0.99	0.97	0.99	1.07	1.06	1.02	0.95	0.96	0.93
Phosphatidylcholine No 02	Complex lipids, fatty acids and related	Phosphatidylcholines	0.98	1.04	1	0.9	0.88	0.92	1.09	1.03	1	0.83	0.93	0.85
Phosphatidylcholine (C16:0,C18:2)	Complex lipids, fatty acids and related	Phosphatidylcholines	0.97	1	0.99	1.01	1.01	1	0.97	1.01	0.97	1.01	1.01	1.01
Phosphatidylcholine (C18:1,C18:2) (additional: Phosphatidylcholine (C16:0,C20:3))	Complex lipids, fatty acids and related	Phosphatidylcholines	0.92	1.04	1.01	0.95	0.9	0.99	0.95	1.01	0.98	0.89	0.88	0.94
Unknown lipid (68000015)	Unknown	Unknown lipid	0.98	1.04	1.08	0.89	0.98	1.11	0.87	1.03	0.96	0.94	1.02	0.91
Phosphatidylcholine (C16:0,C16:0)	Complex lipids, fatty acids and related	Phosphatidylcholines	1.03	1.11	1.13	1.1	0.99	0.96	1.1	0.99	1.12	0.99	1.01	1.02
Unknown lipid (68000017)	Unknown	Unknown lipid	0.86	1.06	1.02	1.12	0.95	0.85	1.03	1.03	1.11	0.83	0.79	0.78
Choline plasmalogen (C18,C20:4)	Complex lipids, fatty acids and related	Plasmalogens	1.09	1	1.07	0.93	0.95	0.99	1.01	0.91	0.88	0.91	1.02	0.9
Phosphatidylcholine (C18:0,C20:4)	Complex lipids, fatty acids and related	Phosphatidylcholines	1	1.01	1	1.01	1.02	1.02	0.99	1.01	1.01	0.99	1.02	1.02
Unknown lipid (68000020)	Unknown	Unknown lipid	0.87	1.05	0.99	0.93	0.83	0.8	1.01	0.88	0.9	0.89	0.66	0.82
Sphingomyelin (d18:1,C23:0)	Complex lipids, fatty acids and related	Sphingomyelins	0.97	1.09	1.08	0.98	0.91	1.01	1.05	1	0.92	0.82	0.85	0.94
DAG (C18:1,C18:2)	Complex lipids, fatty acids and related	Diacylglycerols	0.79	1.79	1.36	0.99	0.66	0.85	0.96	1.19	1.09	0.67	0.79	0.52
Ceramide (d18:1,C24:0)	Complex lipids, fatty acids and related	Ceramides	1.03	1.26	1.08	0.94	0.83	1.1	1.21	1.19	1.13	0.67	0.77	0.72
Unknown lipid (68000028)	Unknown	Unknown lipid	0.97	1.3	1.27	0.95	0.4	0.72	1.17	1.27	0.71	0.59	0.47	0.41
TAG (C18:2,C18:2)	Complex lipids, fatty acids and related	Triacylglycerols	0.68	2.27	1.38	0.94	0.6	0.78	0.91	1.48	1	0.69	0.56	0.43
TAG (C16:0,C18:2)	Complex lipids, fatty acids and related	Triacylglycerols	0.6	2.16	1.42	0.85	0.66	0.89	1.13	1.27	1.16	0.71	0.66	0.68
TAG (C18:1,C18:2)	Complex lipids, fatty acids and related	Triacylglycerols	0.64	2.27	1.28	0.91	0.63	0.77	0.8	1.51	0.7	0.73	0.68	0.41
Unknown lipid (68000033)	Unknown	Unknown lipid	1.23	1.22	1.24	1.16	1.18	1.18	1.28	0.98	1.21	1.16	1.14	1.17
Unknown lipid (68000034)	Unknown	Unknown lipid	1.26	1.1	1.07	1.03	1.02	0.89	1.22	0.92	1.13	1.06	1.06	1.14
Unknown lipid (68000035)	Unknown	Unknown lipid	0.95	1.07	1.07	0.95	0.83	0.88	1.03	1.01	0.96	0.88	0.87	0.84
Lysophosphatidylcholine (C17:0)	Complex lipids, fatty acids and related	Lysophosphatidylcholines	1.07	0.98	1.09	0.96	0.88	0.94	1.07	1.12	1.2	0.94	0.93	0.96
Unknown lipid (68000038)	Unknown	Unknown lipid	1.11	1.07	0.93	0.92	0.95	0.89	1.04	1.12	1.28	0.86	0.81	0.87
Lysophosphatidylcholine (C20:4)	Complex lipids, fatty acids and related	Lysophosphatidylcholines	0.99	0.97	0.97	0.96	0.98	0.99	1.03	0.98	0.99	0.94	0.97	0.98
TAG (C16:0,C16:1)	Complex lipids, fatty acids and related	Triacylglycerols	0.63	2.01	1.14	0.8	0.54	0.8	0.91	1.46	1.05	0.82	0.61	0.44
TAG (C18:2,C18:3)	Complex lipids, fatty acids and related	Triacylglycerols	1.14	1.86	1.07	0.91	0.4	0.57	0.77	1.62	0.56	0.53	0.41	0.29
Unknown lipid (68000045)	Unknown	Unknown lipid	0.98	0.87	0.88	0.95	1.4	0.99	0.92	0.94	0.92	1.14	1.03	1.37
Sphingomyelin (d18:1,C16:0)	Complex lipids, fatty acids and related	Sphingomyelins	0.92	1.03	0.97	0.97	0.97	0.97	1.01	1.02	1.01	0.96	0.99	0.97
Unknown lipid (68000047)	Unknown	Unknown lipid	0.9	1.01	1	0.95	0.9	0.96	0.99	1.06	0.95	0.95	0.93	0.99
Phosphatidylcholine (C16:0,C20:5)	Complex lipids, fatty acids and related	Phosphatidylcholines	0.98	1.08	1.04	1.02	1.08	1.04	0.98	0.98	1.06	1	1.05	1.04
Phosphatidylcholine (C16:0,C20:4) (additional: Phosphatidylcholine (C18:2,C18:2))	Complex lipids, fatty acids and related	Phosphatidylcholines	0.99	0.99	0.98	0.98	0.99	1.02	0.98	0.98	1.02	0.98	1	1.01
Phosphatidylcholine (C18:0,C18:2)	Complex lipids, fatty acids and related	Phosphatidylcholines	0.99	0.99	1.02	1	0.99	1	1	1.01	0.98	0.96	0.99	0.99
Phosphatidylcholine (C18:0,C18:1)	Complex lipids, fatty acids and related	Phosphatidylcholines	1.02	1.02	1.11	1.04	0.98	0.99	1.05	1.02	1.04	0.89	0.93	0.9
Unknown lipid (68000052)	Unknown	Unknown lipid	0.98	1.01	1	0.99	0.99	0.98	1.01	0.99	1.01	0.97	1	0.98
Phosphatidylcholine (C18:0,C20:3) (additional: Phosphatidylcholine (C20:1,C18:2), Phosphatidylcholine (C20:2,C18:1))	Complex lipids, fatty acids and related	Phosphatidylcholines	0.96	0.96	0.95	0.89	0.9	0.9	1	0.99	0.91	0.85	0.91	0.87
Sphingomyelin (d18:1,C24:0)	Complex lipids, fatty acids and related	Sphingomyelins	0.77	0.97	0.97	0.86	0.86	0.91	0.89	1.01	0.98	0.8	0.84	0.85
Phosphatidylcholine (C18:0,C22:6)	Complex lipids, fatty acids and related	Phosphatidylcholines	1	0.98	0.95	0.93	0.89	0.9	1.05	1.06	1	0.96	0.92	0.91
Unknown lipid (68000056)	Unknown	Unknown lipid	1.78	3.18	1.04	0.99	0.34	0.67	1.78	1.36	0.59	0.5	0.32	0.3
TAG (C16:0,C18:1,C18:3) (additional: TAG (C16:0,C18:2,C18:2), TAG (C16:1,C18:1,C18:2))	Complex lipids, fatty acids and related	Triacylglycerols	0.88	2.07	1.75	0.88	0.49	0.84	0.7	2.16	0.87	0.65	0.56	0.42
TAG (C18:1,C18:2,C18:3) (additional: TAG (C16:0,C18:1,C20:5), TAG (C16:0,C18:2,C20:4))	Unknown	Unknown lipid	0.94	1.73	1.41	0.7	0.59	0.8	1.28	1.96	1.03	0.6	0.51	0.39
Unknown lipid (68000059)	Unknown	Unknown lipid	1.25	1.36	1.28	0.77	0.66	0.76	0.95	1.27	0.87	0.45	0.5	0.5
Unknown lipid (68000060)	Unknown	Unknown lipid	0.99	1.16	1.1	1.04	0.99	1.16	1.07	1.45	1.27	0.93	1.17	1.08
Homovanillic acid (HVA)	Hormones, signal substances and related	Catecholamine catabolites	1.13	2.12	0.95	0.89	0.63	0.62	1.09	0.96	0.91	0.85	1.1	0.99
3,4-Dihydroxyphenylacetic acid (DOPAC)	Hormones, signal substances and related	Catecholamine catabolites	0.94	1.42	0.89	0.83	0.76	0.85	1.04	1.09	0.87	0.92	1.42	1.37
3,4-Dihydroxyphenylglycol (DOPEG)	Hormones, signal substances and related	Catecholamine catabolites	0.97	1.03	1.05	0.73	0.92	0.9	1.09	1.07	1.16	0.87	0.86	0.8
Serotonin (5-HT)	Hormones, signal substances and related	Serotonin and serotonin metabolism	0.64	0.63	1.12	0.96	0.47	0.6	0.54	0.84	0.75	0.88	1.05	1.3
Normetanephrine	Hormones, signal substances and related	Catecholamine catabolites	1.19	1.08	0.84	0.9	0.89	0.73	1.21	1.04	0.97	0.99	0.85	0.83
Metanephrine	Hormones, signal substances and related	Catecholamine catabolites	1.22	0.88	0.83	0.81	0.7	0.76	1.18	0.95	0.86	0.97	0.92	0.86
Dopamine	Hormones, signal substances and related	Catecholamines	0.95	1.04	1.05	1	1	1	1.08	0.9	0.92	0.96	1.05	1.01
Noradrenaline (Norepinephrine)	Hormones, signal substances and related	Catecholamines	1.03	1.17	0.69	1.38	0.79	0.79	1.07	1.03	0.99	1.29	0.77	0.85
Adrenaline (Epinephrine)	Hormones, signal substances and related	Catecholamines	1.25	1.27	0.28	1.52	0.83	0.87	1.38	0.61	0.64	1.39	0.81	1.44
3,4-Dihydroxyphenylalanine (DOPA)	Hormones, signal substances and related	Catecholamine precursors	0.98	1.03	0.79	0.85	0.97	0.93	1.03	1	1.01	0.9	0.88	0.99
3-Methoxytyrosine	Hormones, signal substances and related	Catecholamine catabolites	1.16	0.97	1.02	0.86	0.74	0.87	0.99	0.99	0.92	0.79	0.85	0.83
4-Hydroxy-3-methoxyphenylglycol (HMPG)	Hormones, signal substances and related	Catecholamine catabolites	1.23	1.56	1.04	1.07	0.91	0.86	1.05	1.14	0.97	1.07	0.88	0.85
Histamine	Hormones, signal substances and related	Other hormones, signal substances and related	0.73	0.93	0.81	1.42	0.54	0.74	0.48	0.95	1.37	1.75	0.53	1.48
Androstenedione	Hormones, signal substances and related	Steroids and related	0.84	5.64	1.03	1.12	0.66	1.1	1.02	2.52	1.31	1.8	1.2	2.08
Testosterone	Hormones, signal substances and related	Steroids and related	1.21	1.34	1.43	0.99	0.75	0.56	0.89	1.09	0.8	1.36	1.06	1.41
Progesterone	Hormones, signal substances and related	Steroids and related	0.89	0.48	0.25	1.59	4.54	1.05	0.9	0.55	0.82	1.31	3.61	0.35
21-Hydroxyprogesterone (11-Deoxycorticosterone)	Hormones, signal substances and related	Steroids and related	1.17	0.53	0.21	2.2	3.78	0.66	2.27	1.52	0.06	0.96	3.47	0.3
18-Hydroxy-11-deoxycorticosterone	Hormones, signal substances and related	Steroids and related	1.33	1.21	0.4	1.23	1.68	0.75	1.53	0.99	0.17	0.45	2.61	0.34
Corticosterone	Hormones, signal substances and related	Steroids and related	1.13	1.09	0.49	1.4	2.44	0.88	1.43	1.15	0.21	0.85	2.56	0.43

## Sheet: Lisinopril
Profile name:	Lisinopril
pValue:	0.05
			Lisinopril (MOA45) HD	Lisinopril (MOA45) HD	Lisinopril (MOA45) HD	Lisinopril (MOA45) HD	Lisinopril (MOA45) HD	Lisinopril (MOA45) HD	Lisinopril (MOA45) LD	Lisinopril (MOA45) LD	Lisinopril (MOA45) LD	Lisinopril (MOA45) LD	Lisinopril (MOA45) LD	Lisinopril (MOA45) LD
Metabolite	Class	Subclass	f7	f14	f28	m7	m14	m28	f7	f14	f28	m7	m14	m28
Threonine	Amino acids	Amino acids, neutral	1.21	1.43	1.17	0.99	1.15	1.12	1.26	1.24	1.06	1.06	1.01	1.23
Tryptophan	Amino acids	Amino acids, aromatic	0.86	0.81	0.93	0.93	0.87	0.95	1.03	0.84	0.91	1.05	0.77	1.04
Arginine	Amino acids	Amino acids, basic	0.88	0.96	1.09	0.91	0.79	1.01	0.92	0.98	1.07	1.16	0.94	1.06
Citrulline	Amino acids related	Urea cycle and related	0.88	1.08	0.93	1.01	0.96	0.96	1.09	1.1	0.81	0.97	0.87	0.91
Glutamate	Amino acids	Amino acids, acidic	0.96	0.97	0.83	0.92	1	0.91	0.91	0.93	1.08	0.85	0.92	0.8
Phenylalanine	Amino acids	Amino acids, aromatic	0.83	0.95	1.05	0.98	1.09	1	0.97	1.11	1	1.05	1.12	0.93
alpha-Tocopherol	Vitamins, cofactors and related	Tocopherols and related	1.16	0.95	0.98	1.1	1.24	1.12	0.96	0.82	0.98	0.81	1.01	1.03
Pantothenic acid	Vitamins, cofactors and related	Acyl-carriers and related	0.93	0.93	1.07	1.14	0.85	1.14	1.47	0.81	1.01	0.91	0.96	1.07
Taurine	Amino acids	Amino acids, S-containing	0.8	0.72	0.71	0.79	0.99	1.03	0.91	0.81	0.81	0.94	1.03	1.03
Malate	Energy metabolism and related	Citrate cycle	0.69	0.56	0.72	0.75	0.6	0.65	0.92	0.75	0.71	0.73	0.81	0.73
Fructose-6-phosphate (additional: Glucose-6-phosphate, myo-Inositol-1-phosphate, myo-Inositol-2-phosphate, myo-Inositol-4-phosphate)	Energy metabolism and related	Glycolysis/Gluconeogenesis	1.17	0.78	1.42	0.95	0.86	1.91	0.94	0.65	1.18	0.9	0.98	1.23
Salicylic acid	Miscellaneous	Miscellaneous	0.91	0.93	0.96	1.49	1.26	1.05	0.93	0.71	0.89	1.28	0.99	0.91
Coenzyme Q9	Vitamins, cofactors and related	Redox-carrier and related	1.03	1.38	1.38	0.97	1.19	1.17	0.85	1.16	1.1	0.92	1.07	1.18
Cholic acid	Complex lipids, fatty acids and related	Bile acids	2.38	0.38	0.11	6.84	0.6	0.04	0.61	3.15	0.64	0.28	0.11	0.22
Creatinine	Amino acids related	Creatine metabolism	1.02	1.2	0.84	1.13	1.29	1.47	0.88	1.07	0.89	1.09	1.17	1.21
Creatine	Amino acids related	Creatine metabolism	0.92	0.96	0.98	0.95	1.07	1.05	0.97	0.96	1.05	1.36	1.1	1.48
Kynurenic acid	Amino acids related	Tryptophan metabolism	0.92	1.16	1.27	0.9	0.87	0.84	0.72	1.04	1.1	0.7	0.87	0.82
Taurocholic acid	Complex lipids, fatty acids and related	Bile acids	NA	NA	NA	NA	NA	NA	NA	NA	NA	NA	NA	NA
Glycochenodeoxycholic acid (additional: Glycodeoxycholic acid)	Complex lipids, fatty acids and related	Bile acids	NA	NA	NA	NA	NA	NA	NA	NA	NA	NA	NA	NA
Glycerol, lipid fraction	Complex lipids, fatty acids and related	Fatty alcohols	1.17	1.42	1.15	0.91	1.11	0.98	1.02	0.93	1.01	0.66	0.91	0.78
Palmitic acid (C16:0)	Complex lipids, fatty acids and related	Fatty acids, saturated	1.17	1.18	1	1.03	1.07	0.91	0.91	0.97	0.99	0.77	0.85	0.82
Linoleic acid (C18:cis[9,12]2)	Complex lipids, fatty acids and related	Fatty acids, poly-unsaturated	1.05	1.09	0.98	1.05	1.07	1.02	0.84	0.89	0.93	0.81	0.83	0.91
Oleic acid (C18:cis[9]1)	Complex lipids, fatty acids and related	Fatty acids, mono-unsaturated	0.94	1.06	0.95	1.09	1.11	1.03	0.91	1.04	0.98	0.87	0.97	0.86
Stearic acid (C18:0)	Complex lipids, fatty acids and related	Fatty acids, saturated	1.24	1.1	1.04	1.03	1.14	1.1	0.85	1.01	0.96	0.78	0.89	0.93
Arachidonic acid (C20:cis[5,8,11,14]4)	Complex lipids, fatty acids and related	Fatty acids, poly-unsaturated	1.19	1.08	1.07	1.02	1.15	1.06	0.83	1.05	0.94	0.78	0.8	0.91
Docosahexaenoic acid (C22:cis[4,7,10,13,16,19]6)	Complex lipids, fatty acids and related	Fatty acids, poly-unsaturated	1.41	1.25	1.23	1.03	1.27	1.2	1.18	1.07	0.91	0.74	0.78	0.94
Cholesterol, total	Complex lipids, fatty acids and related	Cholesterol and related	1.02	1.04	1.03	1.13	1.23	1.11	0.8	0.97	0.91	0.84	0.92	0.99
beta-Sitosterol	Miscellaneous	Diet related	1.13	0.95	0.95	0.9	0.95	1	0.72	0.74	0.78	0.79	0.75	0.75
Glycerol phosphate, lipid fraction	Complex lipids, fatty acids and related	Phospholipid metabolites	1.2	1.19	1.05	1.06	0.99	1.06	0.77	0.96	1.08	0.79	0.81	0.99
Galactose, lipid fraction	Complex lipids, fatty acids and related	Glycolipids	1.05	1.03	1.22	1.03	1.24	1.06	0.87	1.23	1.19	0.87	1	1.03
Lignoceric acid (C24:0)	Complex lipids, fatty acids and related	Fatty acids, saturated	1.1	0.9	1.05	1.07	1.2	1.32	0.77	0.79	0.96	0.96	1.09	1.03
Campesterol	Miscellaneous	Diet related	1	0.94	0.96	0.92	1	1.08	0.72	0.75	0.78	0.86	0.89	0.86
Hexadecanol	Complex lipids, fatty acids and related	Fatty alcohols	1.14	1.02	0.93	0.96	0.88	0.96	0.94	1.22	0.92	0.87	1.09	0.9
Heneicosanoic acid (C21:0) (additional: Behenic acid (C22:0))	Complex lipids, fatty acids and related	Fatty acids, saturated	1.04	1.12	1.04	1.08	1.05	1.06	0.91	1.03	1.11	1.02	0.96	1.06
Dodecanol	Complex lipids, fatty acids and related	Fatty alcohols	1.09	1.14	1.23	1.22	1.26	1.07	0.87	0.99	0.92	0.81	0.92	1.2
Heptadecanoic acid (C17:0)	Complex lipids, fatty acids and related	Fatty acids, saturated	1.16	1.05	0.98	1.09	0.97	1.12	0.99	1	0.88	0.92	0.82	0.91
Eicosanoic acid (C20:0)	Complex lipids, fatty acids and related	Fatty acids, saturated	1.08	1.16	0.97	0.98	1.52	1.27	0.92	1.07	0.95	0.76	1.02	0.77
Tricosanoic acid (C23:0)	Complex lipids, fatty acids and related	Fatty acids, saturated	1.25	0.98	1.2	1.06	1.23	1.3	0.87	1.04	1.1	1	1.13	0.79
Phosphate, lipid fraction	Complex lipids, fatty acids and related	Phospholipid metabolites	1.32	1.11	0.92	1.01	1.18	0.99	0.9	0.99	0.95	0.96	0.95	0.98
Myristic acid (C14:0)	Complex lipids, fatty acids and related	Fatty acids, saturated	1.01	1.22	0.87	1.19	1.2	1.03	0.99	1.03	0.97	0.68	0.9	0.89
myo-Inositol-2-phosphate, lipid fraction (myo-Inositolphospholipids)	Complex lipids, fatty acids and related	Phospholipid metabolites	1	1.52	1.05	1.19	1.15	1.59	0.57	0.91	1.38	0.84	0.93	1.37
Behenic acid (C22:0)	Complex lipids, fatty acids and related	Fatty acids, saturated	1.13	0.93	0.9	1.14	1.16	1.2	0.88	0.88	0.88	0.87	0.99	0.9
4-Hydroxysphinganine (t18:0, Phytosphingosine), total	Complex lipids, fatty acids and related	Sphingolipids	1.12	1.18	1.09	1.15	1.48	1.57	0.8	1	0.9	0.97	1.02	1.15
Nervonic acid (C24:cis[15]1)	Complex lipids, fatty acids and related	Fatty acids, mono-unsaturated	1.21	0.93	0.96	1.04	1.5	1.18	0.98	1.08	1	0.71	0.92	0.79
Urea	Amino acids related	Urea cycle and related	1.15	1.22	1	1.25	1.87	1.88	0.95	1.05	0.87	1.04	0.99	0.98
Isopalmitic acid (C16:0)	Complex lipids, fatty acids and related	Fatty acids, saturated	1.12	1.48	1.07	1.22	0.99	0.82	0.87	0.99	0.84	0.95	0.94	0.93
Palmitoleic acid (C16:cis[9]1)	Complex lipids, fatty acids and related	Fatty acids, mono-unsaturated	0.91	1.06	0.97	1.13	1.33	0.71	0.78	0.97	1.02	0.83	0.97	0.59
Unknown lipid (28000473)	Unknown	Unknown lipid	0.96	0.95	0.85	0.9	1.13	1	0.6	0.62	0.67	0.9	0.89	0.71
14-Methylhexadecanoic acid	Complex lipids, fatty acids and related	Fatty acids, branched	1	1.05	0.84	1.16	0.89	1.24	1.16	0.98	0.95	1.07	1.01	1.06
gamma-Linolenic acid (C18:cis[6,9,12]3)	Complex lipids, fatty acids and related	Fatty acids, poly-unsaturated	1.02	1.25	0.85	1.2	1.23	1.18	0.81	0.88	0.78	0.75	0.7	0.76
16-Methylheptadecanoic acid	Complex lipids, fatty acids and related	Fatty acids, branched	1.05	1.07	0.82	1.02	1.04	0.98	1.03	0.95	0.94	0.88	0.94	1.06
17-Methyloctadecanoic acid	Complex lipids, fatty acids and related	Fatty acids, branched	0.99	1.18	0.88	1.05	1.11	1	0.88	1.02	0.83	0.92	1.04	0.95
dihomo-gamma-Linolenic acid (C20:cis[8,11,14]3)	Complex lipids, fatty acids and related	Fatty acids, poly-unsaturated	0.8	0.99	0.87	0.86	1.01	0.65	0.81	0.58	0.97	0.66	1.08	0.62
Eicosaenoic acid (C20:1) No 02	Complex lipids, fatty acids and related	Fatty acids, mono-unsaturated	1.18	1.19	1.77	1.7	0.89	1.37	0.45	1.02	0.71	1.49	1.39	0.88
3-O-Methylsphingosine (d18:1) (additional: Sphingolipids, erythro-Sphingosine (d18:1), threo-Sphingosine (d18:1))	Complex lipids, fatty acids and related	Sphingolipids	1.16	1	1.06	1.05	1.51	1.5	0.8	1.06	1	0.83	1.03	1.19
threo-Sphingosine (d18:1) (additional: Sphingolipids)	Complex lipids, fatty acids and related	Sphingolipids	1.11	0.85	0.92	1.07	1.52	1.48	0.94	1	0.93	0.81	0.93	1.04
Docosapentaenoic acid (C22:cis[7,10,13,16,19]5)	Complex lipids, fatty acids and related	Fatty acids, poly-unsaturated	1.59	1.26	1.33	1.03	1.03	1.18	1.07	0.79	1.02	0.82	0.76	0.79
5-O-Methylsphingosine (d18:1) (additional: Sphingolipids, erythro-Sphingosine (d18:1), threo-Sphingosine (d18:1))	Complex lipids, fatty acids and related	Sphingolipids	1.19	0.85	1.06	1.03	1.46	1.41	0.8	0.92	0.99	0.88	0.89	1.06
erythro-Sphingosine (d18:1) (additional: Sphingolipids)	Complex lipids, fatty acids and related	Sphingolipids	1.09	0.85	1.04	1.11	1.47	1.4	0.81	0.95	0.95	0.87	0.98	1.1
Elaidic acid (C18:trans[9]1)	Complex lipids, fatty acids and related	Fatty acids, mono-unsaturated	1.07	1.1	0.99	1.21	1.03	0.96	0.73	0.92	0.87	1.02	0.95	0.87
myo-Inositol, lipid fraction	Complex lipids, fatty acids and related	Glycolipids	1.31	1.33	1.1	1.01	1.15	1.15	1.01	1.15	1.1	0.87	1.02	0.99
Pyruvate (additional: Phosphoenolpyruvate (PEP))	Energy metabolism and related	Glycolysis/Gluconeogenesis	0.91	1.34	1.02	1.14	1.41	1.12	0.98	1.36	0.92	1.1	1.24	0.93
Alanine	Amino acids	Amino acids, neutral	0.95	1.09	0.92	0.96	1.14	1.13	1	0.99	0.82	0.93	1.2	0.93
Glycine	Amino acids	Amino acids, neutral	1.1	1.12	1.08	1.21	1.25	1.29	0.94	1.09	0.95	1.13	1.17	1.06
Methionine	Amino acids	Amino acids, S-containing	0.98	1.09	1.1	1.08	0.95	1.13	0.93	0.98	1.02	0.97	1.12	1.04
5-Oxoproline (additional: Folic acid, Glutamate, Glutamine)	Amino acids related	Amino acid metabolites	0.98	1	1	0.91	0.97	0.99	0.98	0.89	1.04	1.01	0.94	1.01
Cysteine (additional: Cystine)	Amino acids	Amino acids, S-containing	0.78	0.89	0.71	0.91	0.8	0.75	0.87	0.92	0.85	1.18	0.78	1
Citrate	Energy metabolism and related	Citrate cycle	0.94	0.97	0.89	1.01	0.97	1.03	0.81	0.97	0.95	0.9	0.95	0.9
Lysine	Amino acids	Amino acids, basic	1.12	1.15	1.15	0.92	1.13	1.23	1.33	1.34	1	1.02	1.04	1.12
myo-Inositol	Carbohydrates and related	Polyols	0.72	0.95	0.84	0.95	1.1	1.29	0.71	0.75	0.76	0.86	1.01	1.03
Sucrose	Carbohydrates and related	Disaccharides	0.67	0.8	0.85	1.58	1.2	1.39	0.67	0.82	1.07	1.24	3.65	1.21
Mannose	Carbohydrates and related	Monosaccharides	1.14	1.08	1.03	0.97	0.98	0.96	0.96	1.04	1.06	1	0.97	0.92
Glucose (additional: Galactose, Gluconic acid, Mannitol)	Carbohydrates and related	Monosaccharides	1.04	0.9	0.92	0.94	1.03	0.91	0.89	0.93	0.99	0.98	0.93	0.93
Glycerol, polar fraction	Complex lipids, fatty acids and related	Lipid precursors	0.79	0.91	0.96	1.07	1.02	0.9	0.88	0.8	1.08	0.91	1.13	0.78
Spermidine	Miscellaneous	Polyamines	0.85	0.88	1.2	0.9	0.77	0.87	0.79	1.23	0.95	0.88	0.89	0.96
Glutamine	Amino acids	Amino acids, basic	1.12	0.89	1.05	0.95	0.89	0.97	0.88	1.12	0.92	0.84	1.16	1.01
Ornithine (additional: Arginine, Citrulline)	Amino acids related	Urea cycle and related	1.1	1.14	1.08	1.1	1.09	0.99	0.94	1.14	1.06	0.99	1.03	0.96
Phosphate (inorganic and from organic phosphates)	Miscellaneous	Miscellaneous	0.92	1.02	0.99	0.94	1.01	1.04	0.93	0.96	0.99	0.91	1.06	0.95
Serine	Amino acids	Amino acids, neutral	1.15	1.16	1.09	1.12	1.08	1.15	1.06	1.1	1.09	1	1.08	1.08
Glycerol-3-phosphate, polar fraction	Complex lipids, fatty acids and related	Lipid precursors	1.05	0.99	1.17	0.99	0.97	1.14	0.84	1.04	0.9	1.07	1.36	1.13
Valine	Amino acids	Amino acids, branched chain	0.97	0.98	1.08	0.97	0.96	0.89	0.97	0.98	1.03	0.98	0.99	0.97
Aspartate	Amino acids	Amino acids, acidic	0.91	0.93	0.85	1.03	0.87	1.08	0.83	0.86	0.98	0.88	0.95	0.94
Isoleucine	Amino acids	Amino acids, branched chain	0.97	0.94	1.11	0.97	0.87	0.85	1.01	0.96	1.01	0.95	0.98	0.93
Leucine	Amino acids	Amino acids, branched chain	0.97	0.91	1.04	0.95	0.92	0.84	1.03	0.95	0.96	0.93	0.96	0.94
Proline	Amino acids	Amino acids, neutral	1.1	1.18	1.16	1.01	1.03	1.14	1.1	1.16	1	0.99	1.08	1.05
Threonic acid	Vitamins, cofactors and related	Ascorbic acid and related	0.97	0.91	0.93	0.88	0.9	1.2	0.84	0.82	0.94	0.84	1.24	0.84
Lactate	Energy metabolism and related	Glycolysis/Gluconeogenesis	0.44	0.52	0.47	0.64	0.74	0.64	0.49	0.6	0.6	0.75	0.86	0.78
Glycolate	Miscellaneous	Miscellaneous	1.07	1.2	0.9	1.02	0.93	0.98	0.9	1.19	0.94	1.01	1.53	1.03
Asparagine	Amino acids	Amino acids, basic	1.03	1.08	1.18	0.96	1.11	1.15	0.96	0.89	1.01	1.13	0.96	1.11
Ascorbic acid (additional: Glucose)	Vitamins, cofactors and related	Ascorbic acid and related	1.08	0.97	0.91	0.81	0.98	1.07	0.93	0.91	1.04	0.84	1	0.93
Tyrosine	Amino acids	Amino acids, aromatic	0.9	0.84	0.87	1.11	1.12	1.06	0.78	0.99	0.99	1.08	1.12	1.13
Unknown polar (38000389)	Unknown	Unknown polar	0.56	0.73	0.59	1.1	2.13	1.05	0.36	0.77	0.94	0.72	1.05	1.15
3-Hydroxybutyrate	Energy metabolism and related	Ketone bodies	1.15	0.95	1.06	1.26	1.27	1.12	0.98	1.03	1.2	1.29	1.21	1.22
Ribal (additional: 2'-Deoxyadenosine, 2'-Deoxycytidine, 2'-Deoxyguanosine, 2'-Deoxythymidine, 2'-Deoxyuridine)	Carbohydrates and related	Nucleobase related saccharides	1.02	0.96	1.04	0.89	0.88	0.95	0.98	0.94	1.03	0.94	1.05	1.25
Unknown polar (38000433)	Unknown	Unknown polar	0.92	1.09	1.28	0.79	0.97	1.05	0.69	1.24	1.3	1.08	0.97	1.32
trans-4-Hydroxyproline	Amino acids related	Collagen metabolism	1.03	1.24	1.08	1.18	1.32	1.47	1.02	1.04	0.93	1.05	1.08	1.02
Cytosine (additional: 2'-Deoxycytidine)	Nucleobases and related	Pyrimidine metabolism	0.97	1.03	0.98	0.97	0.89	1	0.96	1.06	1.12	0.91	1.01	1.08
Unknown polar (38000449)	Unknown	Unknown polar	0.64	0.74	0.84	1.38	2.94	1.1	0.33	0.82	1.1	0.82	1.12	1.18
1,5-Anhydrosorbitol	Carbohydrates and related	Polyols	1.31	1.13	1.04	1.22	1.2	1.53	1.17	1.06	1.32	0.91	0.95	1.03
Histidine	Amino acids	Amino acids, basic	1.1	0.94	1.15	0.95	0.98	1.04	0.99	1.28	0.94	0.94	0.92	1.01
Uracil	Nucleobases and related	Pyrimidine metabolism	1.05	0.84	1.01	0.89	1.02	1.07	1.01	0.93	1.05	0.89	1.17	1.14
Xylitol	Carbohydrates and related	Polyols	1.57	1.02	0.73	1.06	1.34	1.47	1.3	0.86	0.7	0.77	0.91	0.95
3-Hydroxyindole (additional: 3-Indoxylsulfate)	Amino acids related	Tryptophan metabolism	1.68	2.1	1.64	1.58	1.55	2.5	1.1	1.39	0.92	1.47	0.85	1.06
Glucuronic acid	Carbohydrates and related	Sugar acids	1.26	0.96	0.74	0.87	0.85	1.13	0.8	0.94	0.84	0.73	0.95	0.85
Indole-3-acetic acid	Amino acids related	Tryptophan metabolism	1.12	1.39	0.97	1.18	0.81	0.92	0.79	1.1	0.62	1.35	0.87	0.99
Pseudouridine	Nucleobases and related	Pyrimidine metabolism	1.11	1.12	0.94	0.96	1.29	1.35	1	1.03	0.89	0.91	1	0.93
Uric acid	Nucleobases and related	Purine metabolism	0.95	0.53	0.76	0.75	0.67	0.84	0.73	0.74	0.84	0.78	1.02	0.98
scyllo-Inositol	Carbohydrates and related	Polyols	1.06	1.08	1.06	0.95	1.01	1.49	0.77	0.73	0.93	1.06	1.27	1.15
Erythronic acid	Carbohydrates and related	Sugar acids	0.93	1.18	1.01	1.22	1.4	1.48	0.87	0.89	0.87	1.16	1.21	0.84
Allantoin	Nucleobases and related	Purine metabolism	1.05	1.07	0.95	1.12	1.16	1.39	0.89	0.99	1.02	1.18	1.04	0.96
3-Hydroxyisobutyrate	Amino acids related	Amino acid metabolites	NA	NA	NA	NA	NA	NA	NA	NA	NA	NA	NA	NA
Cystine	Amino acids	Amino acids, S-containing	0.69	0.88	0.85	0.83	0.8	0.71	0.72	1.19	0.84	1.69	0.79	0.94
3-Phosphoglycerate (3-PGA)	Energy metabolism and related	Glycolysis/Gluconeogenesis	0.74	0.68	0.7	0.6	0.67	0.77	0.8	0.98	0.56	0.69	0.73	0.66
2-Hydroxybutyrate	Energy metabolism and related	Energy metabolism, miscellaneous	1.25	1.02	0.97	1.04	0.99	0.97	0.91	1.15	1.05	1.21	0.98	1.27
Ketoleucine	Amino acids related	Amino acid metabolites	0.94	0.83	0.87	0.7	0.91	0.79	0.9	0.96	0.96	0.86	1.13	0.91
Mannosamine	Carbohydrates and related	Aminosugars	1.28	0.86	0.74	0.85	0.81	0.67	0.9	1.82	0.93	0.8	0.95	0.57
Glucosamine	Carbohydrates and related	Aminosugars	1.08	0.86	0.77	0.8	1.4	0.89	0.89	2.06	0.89	1.02	1.13	0.96
Indole-3-lactic acid	Amino acids related	Tryptophan metabolism	1	0.79	1.05	0.83	0.81	0.83	1.11	0.98	1.13	0.96	0.9	0.99
Unknown polar (58000010)	Unknown	Unknown polar	0.76	0.92	0.8	1.09	0.9	1.09	0.44	0.64	0.52	0.78	1.33	0.82
Unknown polar (58000014)	Unknown	Unknown polar	NA	NA	0.3	0.76	0.72	0.92	NA	NA	0.36	0.99	0.75	1.25
Unknown polar (58000017)	Unknown	Unknown polar	0.42	0.44	0.72	1.99	0.74	1.12	0.42	0.8	1.35	1.12	1.15	1
Unknown polar (58000018)	Unknown	Unknown polar	0.89	1.02	0.73	1.07	0.83	0.98	0.8	0.96	1.07	0.94	0.87	1.03
Hippuric acid	Miscellaneous	Miscellaneous	0.69	0.53	0.81	2.29	2.74	0.73	1.54	0.75	0.32	1	1.13	0.53
3-Indoxylsulfate	Amino acids related	Tryptophan metabolism	1.24	2.12	1.57	2.65	1.92	1.21	1.03	1.24	0.71	1.53	0.92	0.71
Succinate	Energy metabolism and related	Citrate cycle	1.05	1.08	0.99	1.06	1.02	0.97	0.96	0.93	1.04	1	0.88	1.08
Unknown polar (58000132)	Unknown	Unknown polar	1.19	0.97	0.92	0.64	0.95	1.07	0.97	1.11	0.89	0.98	1.29	1.27
Unknown polar (58000133)	Unknown	Unknown polar	0.84	1.07	0.87	0.94	1.53	0.9	1.04	1.05	1.42	0.96	1.22	0.86
Unknown polar (58000140)	Unknown	Unknown polar	1.11	1.09	0.9	0.9	1.03	0.84	0.91	1.04	1.55	1.02	1.08	1.35
Unknown polar (58000141)	Unknown	Unknown polar	0.99	0.9	1.12	1.51	1.02	0.93	0.89	0.77	1.28	1.25	1.36	1.06
Unknown polar (58000142)	Unknown	Unknown polar	0.66	0.96	1.03	1.18	1.32	0.83	0.88	0.71	1.04	0.8	1.05	1.03
Unknown polar (58000143)	Unknown	Unknown polar	1.27	1.07	0.84	1.18	1.21	1.29	1.05	1.23	0.96	0.97	0.93	1.06
Unknown polar (58000144)	Unknown	Unknown polar	0.75	0.96	1.33	1.23	0.96	0.8	1.13	1.16	1.16	0.97	1	1
Unknown polar (58000145)	Unknown	Unknown polar	0.76	0.71	0.92	1.36	0.87	0.94	0.93	1.05	1.12	1.04	0.85	0.95
Unknown polar (58000146)	Unknown	Unknown polar	1	0.88	0.95	1.01	1.07	0.98	1.12	1.03	0.87	1.1	1.01	1.23
Unknown polar (58000147)	Unknown	Unknown polar	0.76	0.94	0.8	1.6	1.01	1.05	0.98	0.82	1.33	1.18	0.7	1.29
Unknown polar (58000148)	Unknown	Unknown polar	0.87	0.99	1	0.8	0.93	1.06	0.9	1.37	0.88	0.82	0.92	1.06
Unknown polar (58000149)	Unknown	Unknown polar	1.2	0.72	0.88	1.38	1.08	0.94	0.88	1.21	0.82	1.42	0.85	0.92
Unknown polar (58000152)	Unknown	Unknown polar	0.99	0.72	1.09	0.92	0.96	0.85	0.92	1.08	1	0.89	1.35	0.84
Unknown polar (58000153)	Unknown	Unknown polar	0.99	0.99	1.3	0.83	1.13	0.99	1.07	0.97	1.08	0.95	0.88	0.97
Unknown polar (58000154)	Unknown	Unknown polar	1.18	0.81	1.5	0.88	0.97	0.92	1.4	1.17	0.9	1.23	0.71	1.21
Unknown polar (58000155)	Unknown	Unknown polar	1.03	1.1	1.1	0.82	0.9	0.95	1.08	1.14	1.45	1.21	1.02	0.93
Unknown polar (58000156)	Unknown	Unknown polar	0.97	0.99	1.47	1.05	1.42	0.78	0.96	1.33	1.14	1.11	1.14	0.94
Unknown polar (58000157)	Unknown	Unknown polar	1.11	1	1.3	1.25	0.86	1	1.19	0.97	1.01	1.08	0.77	1.16
Unknown polar (58000158)	Unknown	Unknown polar	1.02	0.87	1.03	1.29	1.2	1.43	0.51	0.41	1.61	1.2	1.43	1.25
Unknown polar (58000159)	Unknown	Unknown polar	0.92	0.94	1	1.13	1.09	1.16	0.97	0.96	0.85	0.9	0.95	0.98
Unknown polar (58000160)	Unknown	Unknown polar	0.93	1.28	1.02	1.07	1.05	1.03	0.79	0.81	1.04	1.22	0.87	1.44
Unknown polar (58000161)	Unknown	Unknown polar	1.04	1.06	1.09	1.03	1.14	0.89	0.99	1.04	0.92	0.99	1.53	0.96
Unknown polar (58000162)	Unknown	Unknown polar	1.58	0.94	1.11	1.11	1.28	0.92	1.29	1.01	1.47	1.02	0.98	1.1
Unknown polar (58000164)	Unknown	Unknown polar	1.21	0.96	1.25	1.19	0.82	1.04	1.02	0.93	1.05	1.13	0.93	1.27
Unknown polar (58000165)	Unknown	Unknown polar	0.91	0.95	1.15	1.16	0.94	1.01	0.96	1.03	1.04	1.11	0.99	1.16
Unknown polar (58000166)	Unknown	Unknown polar	0.94	1.04	1.05	0.87	0.77	0.97	0.87	0.85	1.09	0.81	0.82	1.35
Unknown polar (58000167)	Unknown	Unknown polar	0.88	1.03	0.85	1.05	1	0.88	1.08	0.91	0.91	1.03	1.14	0.96
Unknown polar (58000168)	Unknown	Unknown polar	1.09	1.39	1.27	1.05	0.9	0.92	1.32	0.93	1.19	1.03	0.96	0.88
Unknown polar (58000169)	Unknown	Unknown polar	1.22	0.81	1.4	1.14	1.19	1.06	0.77	0.99	1.35	0.83	0.87	0.99
Unknown polar (58000170)	Unknown	Unknown polar	1.06	0.67	0.78	0.76	0.95	0.94	1.14	0.74	0.68	0.98	0.76	1.09
Unknown polar (58000171)	Unknown	Unknown polar	1.09	1.29	0.78	1.23	0.97	1.12	1.07	0.99	1	0.98	0.84	0.95
Unknown polar (58000172)	Unknown	Unknown polar	0.91	0.92	1.53	0.85	0.95	1.21	0.86	1.06	1.17	1	0.84	1
Lysophosphatidylcholine (C18:2)	Complex lipids, fatty acids and related	Lysophosphatidylcholines	0.9	0.86	0.93	1.12	1.01	0.99	0.84	0.86	1.01	1.04	0.94	0.96
Lysophosphatidylethanolamine (C22:5)	Complex lipids, fatty acids and related	Lysophosphatidylethanolamines	1.05	0.91	0.97	0.99	1.08	0.91	1	0.91	1.01	1.05	0.83	0.97
Lysophosphatidylcholine (C16:0)	Complex lipids, fatty acids and related	Lysophosphatidylcholines	1.01	1	1.08	1.06	1.14	1.08	0.97	0.94	1.02	0.94	1.1	1.07
Lysophosphatidylcholine (C18:1)	Complex lipids, fatty acids and related	Lysophosphatidylcholines	1.01	0.78	1.1	1.01	0.95	0.89	0.93	0.72	1.13	1	0.93	0.77
Lysophosphatidylcholine (C18:0)	Complex lipids, fatty acids and related	Lysophosphatidylcholines	1	1.04	1.02	1.02	1.02	1.03	1	1	1.01	0.99	0.98	1.03
Sphingomyelin (d18:2,C16:0)	Complex lipids, fatty acids and related	Sphingomyelins	0.9	1.05	1.12	1.21	1.38	1.13	0.94	0.98	1.06	1	0.83	0.96
Sphingomyelin (d18:2,C18:0)	Complex lipids, fatty acids and related	Sphingomyelins	1.28	1.01	1.04	1.12	1.1	1.12	0.96	1.01	1.13	0.91	0.97	1.1
Phosphatidylcholine (C16:1,C18:2)	Complex lipids, fatty acids and related	Phosphatidylcholines	0.89	1.07	0.92	1.2	1.12	0.95	0.88	0.92	1.16	0.76	1.01	0.85
Phosphatidylcholine (C16:0,C22:6) (additional: Phosphatidylcholine (C18:2,C20:4))	Complex lipids, fatty acids and related	Phosphatidylcholines	1.03	1.02	1.03	1.01	1.02	1.04	1.01	1	1.03	0.94	0.95	1.01
Phosphatidylcholine No 02	Complex lipids, fatty acids and related	Phosphatidylcholines	1.28	1.04	0.73	0.95	1.34	1.29	0.79	0.79	1.12	0.74	1.09	1.14
Phosphatidylcholine (C16:0,C18:2)	Complex lipids, fatty acids and related	Phosphatidylcholines	0.99	1	1.01	1.02	1	0.99	1.01	0.98	0.99	1	1	0.99
Phosphatidylcholine (C18:1,C18:2) (additional: Phosphatidylcholine (C16:0,C20:3))	Complex lipids, fatty acids and related	Phosphatidylcholines	1.04	0.98	1.12	1.12	0.91	0.97	1.02	1.15	0.9	0.89	1.1	0.8
Unknown lipid (68000015)	Unknown	Unknown lipid	1	0.97	0.99	1.07	1.27	1.11	0.96	0.82	1.01	1.16	1.19	1.28
Phosphatidylcholine (C16:0,C16:0)	Complex lipids, fatty acids and related	Phosphatidylcholines	1.02	0.93	0.95	1.08	1.09	1.23	0.93	0.92	0.99	0.95	0.94	1.03
Unknown lipid (68000017)	Unknown	Unknown lipid	1.22	0.93	0.79	0.94	0.9	1.1	0.99	0.88	0.96	1.04	0.77	0.92
Choline plasmalogen (C18,C20:4)	Complex lipids, fatty acids and related	Plasmalogens	0.98	1.04	1.06	1.15	1.03	0.99	0.9	0.99	0.94	0.98	1.1	1.04
Phosphatidylcholine (C18:0,C20:4)	Complex lipids, fatty acids and related	Phosphatidylcholines	0.99	1	0.99	0.98	0.98	1	0.98	1	0.98	0.99	1.01	0.99
Unknown lipid (68000020)	Unknown	Unknown lipid	1.13	1.03	1.24	0.93	0.98	0.96	1.01	1.01	1.01	0.84	0.93	0.95
Sphingomyelin (d18:1,C23:0)	Complex lipids, fatty acids and related	Sphingomyelins	0.93	0.89	0.98	1.13	1.07	1.17	0.96	0.97	0.98	0.96	1.07	1.03
DAG (C18:1,C18:2)	Complex lipids, fatty acids and related	Diacylglycerols	1.12	1.55	1.41	0.98	1.15	0.86	0.97	0.93	1.14	0.77	0.91	0.77
Ceramide (d18:1,C24:0)	Complex lipids, fatty acids and related	Ceramides	1.08	0.79	1.02	1.22	1.19	1.24	0.76	0.72	0.85	0.92	0.93	0.98
Unknown lipid (68000028)	Unknown	Unknown lipid	0.93	1.85	1.24	1.22	1.41	1.28	0.97	1.03	1.05	0.7	0.86	0.79
TAG (C18:2,C18:2)	Complex lipids, fatty acids and related	Triacylglycerols	1.45	1.64	1.1	0.91	1.21	0.99	1.08	1.05	0.91	0.72	0.9	0.59
TAG (C16:0,C18:2)	Complex lipids, fatty acids and related	Triacylglycerols	1.37	1.74	1.39	0.97	0.97	0.97	1.04	1.17	1.37	0.81	0.92	0.86
TAG (C18:1,C18:2)	Complex lipids, fatty acids and related	Triacylglycerols	1.32	1.83	1.43	1.09	1.34	1.2	0.94	1.56	1.09	0.83	0.95	0.73
Unknown lipid (68000033)	Unknown	Unknown lipid	1.21	1.03	0.93	0.89	1.14	1.03	1.14	1.02	1.27	0.99	1.17	1.15
Unknown lipid (68000034)	Unknown	Unknown lipid	0.96	1.06	1.14	1.12	0.98	0.96	1.05	1.1	1.13	1	1.06	0.99
Unknown lipid (68000035)	Unknown	Unknown lipid	1.02	1.03	1.03	0.99	1.01	1.01	0.98	1.01	1.01	0.98	0.98	0.98
Lysophosphatidylcholine (C17:0)	Complex lipids, fatty acids and related	Lysophosphatidylcholines	1.18	1.16	1.29	1.02	0.98	0.9	1.03	0.95	1.05	0.99	0.97	0.89
Unknown lipid (68000038)	Unknown	Unknown lipid	0.91	1	1.09	1.02	1.05	0.99	1.02	1.05	0.91	1.04	1.02	0.97
Lysophosphatidylcholine (C20:4)	Complex lipids, fatty acids and related	Lysophosphatidylcholines	1.01	1	0.99	1.02	0.98	0.97	0.97	1	0.97	0.97	0.97	0.99
TAG (C16:0,C16:1)	Complex lipids, fatty acids and related	Triacylglycerols	0.97	1.45	1.15	1.03	1.29	0.88	1.02	1.18	1.29	0.57	0.67	0.51
TAG (C18:2,C18:3)	Complex lipids, fatty acids and related	Triacylglycerols	1.28	1.99	1.22	1.15	0.98	0.95	0.97	1.23	1.09	0.64	0.82	0.68
Unknown lipid (68000045)	Unknown	Unknown lipid	1.33	1.08	1.13	1.02	0.9	1.15	1.21	1.21	1.3	1.54	1.04	1.3
Sphingomyelin (d18:1,C16:0)	Complex lipids, fatty acids and related	Sphingomyelins	1	1.06	1.07	1.06	1.02	1.09	0.99	1.04	1.01	0.98	1.02	1.05
Unknown lipid (68000047)	Unknown	Unknown lipid	0.96	0.99	0.96	1.12	1.1	1.21	0.9	0.95	0.97	1.02	1	1.11
Phosphatidylcholine (C16:0,C20:5)	Complex lipids, fatty acids and related	Phosphatidylcholines	0.97	0.95	0.95	1.03	1.05	1.04	1.04	0.95	0.99	0.93	1.01	1.01
Phosphatidylcholine (C16:0,C20:4) (additional: Phosphatidylcholine (C18:2,C18:2))	Complex lipids, fatty acids and related	Phosphatidylcholines	1.01	1	0.99	0.99	1	1.01	1	0.99	0.99	1.01	1.02	1
Phosphatidylcholine (C18:0,C18:2)	Complex lipids, fatty acids and related	Phosphatidylcholines	0.99	1	0.99	1.01	1	1	1	1	0.98	1	1	1
Phosphatidylcholine (C18:0,C18:1)	Complex lipids, fatty acids and related	Phosphatidylcholines	0.97	0.96	0.9	0.97	1.07	1.12	1.04	1.01	0.9	0.85	0.85	0.86
Unknown lipid (68000052)	Unknown	Unknown lipid	0.99	0.98	0.99	1	1.01	1	1	1	1	0.96	1.02	1
Phosphatidylcholine (C18:0,C20:3) (additional: Phosphatidylcholine (C20:1,C18:2), Phosphatidylcholine (C20:2,C18:1))	Complex lipids, fatty acids and related	Phosphatidylcholines	1.05	1	1	0.98	1.03	1.04	0.98	0.96	1	0.98	0.95	1.01
Sphingomyelin (d18:1,C24:0)	Complex lipids, fatty acids and related	Sphingomyelins	1.01	0.99	0.95	1.05	1.04	1.02	0.97	0.96	1	0.96	1.05	1.02
Phosphatidylcholine (C18:0,C22:6)	Complex lipids, fatty acids and related	Phosphatidylcholines	1.03	1.05	1.06	1.06	1.07	1.1	1.02	1.06	1.01	0.97	0.93	1.08
Unknown lipid (68000056)	Unknown	Unknown lipid	1.8	1.75	1.24	1.03	1.62	1.17	1.23	1.32	0.83	0.78	1	0.61
TAG (C16:0,C18:1,C18:3) (additional: TAG (C16:0,C18:2,C18:2), TAG (C16:1,C18:1,C18:2))	Complex lipids, fatty acids and related	Triacylglycerols	1.55	1.8	1.47	0.83	1.06	0.7	0.72	2.03	0.88	0.81	0.97	0.61
TAG (C18:1,C18:2,C18:3) (additional: TAG (C16:0,C18:1,C20:5), TAG (C16:0,C18:2,C20:4))	Unknown	Unknown lipid	1.44	1.73	1.01	0.91	1.15	0.95	1.06	1.03	0.86	0.78	0.95	0.61
Unknown lipid (68000059)	Unknown	Unknown lipid	1.21	1.28	1.19	0.96	1.15	1.1	1	1.04	1.08	0.67	0.93	0.87
Unknown lipid (68000060)	Unknown	Unknown lipid	1.15	1.03	1.17	1.16	0.93	1.05	0.98	0.79	1.04	0.92	0.8	0.93
Homovanillic acid (HVA)	Hormones, signal substances and related	Catecholamine catabolites	0.65	0.76	0.71	1.08	1.4	1.37	0.65	0.8	0.88	0.84	1.23	0.87
3,4-Dihydroxyphenylacetic acid (DOPAC)	Hormones, signal substances and related	Catecholamine catabolites	0.82	0.73	0.72	0.93	0.87	0.83	0.75	0.87	1.02	0.86	1.14	1.04
3,4-Dihydroxyphenylglycol (DOPEG)	Hormones, signal substances and related	Catecholamine catabolites	0.94	1.03	0.75	0.99	0.97	1.08	1.06	1.03	0.93	0.91	1.23	1.21
Serotonin (5-HT)	Hormones, signal substances and related	Serotonin and serotonin metabolism	2.41	1.67	1.02	0.57	1.95	1.8	1.01	0.45	0.87	0.21	1.4	0.66
Normetanephrine	Hormones, signal substances and related	Catecholamine catabolites	1.06	0.75	0.84	1.14	0.93	1.14	1.27	0.97	0.82	1.13	1.09	1.37
Metanephrine	Hormones, signal substances and related	Catecholamine catabolites	0.94	0.92	1.01	0.96	0.92	0.75	0.99	0.99	0.97	1	1.63	1.28
Dopamine	Hormones, signal substances and related	Catecholamines	0.95	0.98	0.89	1	1.13	0.94	0.96	1.16	1.09	1.09	1.04	1.01
Noradrenaline (Norepinephrine)	Hormones, signal substances and related	Catecholamines	1.3	0.89	0.98	0.95	1	0.88	0.97	0.7	0.79	0.92	1.94	1.04
Adrenaline (Epinephrine)	Hormones, signal substances and related	Catecholamines	0.77	0.68	3.06	2.51	0.57	0.31	0.83	0.6	1.43	1.3	0.94	1.33
3,4-Dihydroxyphenylalanine (DOPA)	Hormones, signal substances and related	Catecholamine precursors	1.07	0.82	0.87	1.02	1.16	0.94	1.02	0.82	0.82	1.03	1.08	0.89
3-Methoxytyrosine	Hormones, signal substances and related	Catecholamine catabolites	1.1	1.14	1.16	1.38	1.14	1.19	0.96	0.99	1.2	1.09	1.08	1.1
4-Hydroxy-3-methoxyphenylglycol (HMPG)	Hormones, signal substances and related	Catecholamine catabolites	1.1	1.06	1.06	1	1.1	1.09	1.14	1.05	1.21	1.12	1.19	1.21
Histamine	Hormones, signal substances and related	Other hormones, signal substances and related	1.38	0.81	1.03	1.62	1.18	1.33	1.33	0.89	0.96	1.13	1.99	1.02
Androstenedione	Hormones, signal substances and related	Steroids and related	1.46	1.06	0.77	0.57	0.66	0.18	0.8	1.04	0.6	0.31	0.6	0.21
Testosterone	Hormones, signal substances and related	Steroids and related	0.47	0.76	0.13	0.33	0.57	0.19	0.08	0.29	0.49	0.2	0.5	0.2
Progesterone	Hormones, signal substances and related	Steroids and related	1.09	2.84	1.4	4.12	3.72	5.5	0.91	3.35	0.41	6.17	7.29	2.68
21-Hydroxyprogesterone (11-Deoxycorticosterone)	Hormones, signal substances and related	Steroids and related	1.81	1.87	1.34	2.53	1.29	1.65	2.76	2.4	1.11	3.07	3.37	0.91
18-Hydroxy-11-deoxycorticosterone	Hormones, signal substances and related	Steroids and related	1.23	2.03	1.08	1.9	1.34	1.52	1.67	1.78	1.09	2.34	2.1	1.3
Corticosterone	Hormones, signal substances and related	Steroids and related	1.5	1.72	0.92	2.4	1.54	1.54	1.61	1.85	1.14	2.33	2.29	1.37

## Sheet: Legend
Statistical quantities	Explanation
Ratio	median metabolite change relative to control
Metabolite Name	Explanation
Additional	Quantitation can be disturbed by metabolites exhibiting identical analytical characteristics with respect to quantitation method. Literature data and/or comparison with alternative methods (e.g. LC-MS / GC-MS) suggest that disturbing metabolite is present at minor levels only.
Coloring of ratios, p-values, t-values:
ratio > 1 & p-value < 0.05
ratio < 1 & p-value < 0.05
